# Supplementary material for: Extraordinary diversity among members of the large gene family, 185/333, from the purple sea urchin, Strongylocentrotus purpuratus
Source: PubMed Central journal article supplement (PMC1988830; doi:10.1186/1471-2199-8-68), 2007-08-15
Supplement: 1471-2199-8-68-S1.pdf [file 1471-2199-8-68-S1.pdf]

Additional File 1: Characteristics of the 171 cloned and sequenced genes. The clone number, source animal, Genbank accession number and size are shown, in addition to the element pattern for both the cDNA-based and repeat-based alignments, intron type, Ex15/Er10 element subtype, and location of the stop codon.

| Animal | Sequence | Genbank<br>Acc. # | Gene (Nt) | Intron (Nt) | ORF (Nt) | ORF (aa) | cDNA<br>Pattern              | RBA<br>Pattern                    | Intron<br>Type | 10/15<br>Subtype | 25 stop |
|--------|----------|-------------------|-----------|-------------|----------|----------|------------------------------|-----------------------------------|----------------|------------------|---------|
| 2      | 2-002    | EF607673          | 1542      | 411         | 1131     | 377      | <i>D1</i>                    | <i>rD1/6/7</i>                    | $\alpha$       | d                | b       |
| 2      | 2-005    | EF607674          | 1544      | 413         | 1131     | 377      | <i>D7</i>                    | <i>rD1/6/7</i>                    | $\alpha$       | d                | c       |
| 2      | 2-006    | EF607675          | 1440      | 414         | 1026     | 342      | <i>F1</i>                    | <i>rF1/2</i>                      | $\beta$        | f                | b       |
| 2      | 2-007    | EF607676          | 1542      | 411         | 1131     | 377      | <i>D1</i>                    | <i>rD1/6/7</i>                    | $\alpha$       | d                | b       |
| 2      | 2-008    | EF607677          | 1542      | 411         | 1131     | 377      | <i>D1</i>                    | <i>rD1/6/7</i>                    | $\alpha$       | d                | b       |
| 2      | 2-009    | EF607678          | 1440      | 414         | 1026     | 342      | <i>F1</i>                    | <i>rF1/2</i>                      | $\beta$        | f                | b       |
| 2      | 2-010    | EF607679          | 1440      | 414         | 1026     | 342      | <i>F1</i>                    | <i>rF1/2</i>                      | $\beta$        | f                | b       |
| 2      | 2-011    | EF607688          | 1333      | 406         | 927      | 309      | <i>E3<math>\delta</math></i> | <i>rE2/3<math>\delta</math>/7</i> | $\delta$       | e                | a       |
| 2      | 2-012    | EF607697          | 1318      | 406         | 912      | 304      | <i>E2</i>                    | <i>rE2/3<math>\delta</math>/7</i> | $\delta$       | e                | a       |
| 2      | 2-013    | EF607698          | 1544      | 413         | 1131     | 377      | <i>D1</i>                    | <i>rD1/6/7</i>                    | $\alpha$       | d                | b       |
| 2      | 2-015    | EF607699          | 1335      | 405         | 930      | 310      | <i>E8</i>                    | <i>rE2/3<math>\delta</math>/7</i> | $\delta$       | e                | b       |
| 2      | 2-017    | EF607700          | 1338      | 411         | 927      | 309      | <i>E3<math>\alpha</math></i> | <i>rE3<math>\alpha</math></i>     | $\alpha$       | e                | a       |
| 2      | 2-018    | EF607701          | 1543      | 412         | 1131     | 377      | <i>D1</i>                    | <i>rD1/6/7</i>                    | $\alpha$       | d                | b       |
| 2      | 2-019    | EF607702          | 1318      | 406         | 912      | 304      | <i>E2</i>                    | <i>rE2/3<math>\delta</math>/7</i> | $\delta$       | e                | a       |
| 2      | 2-020    | EF607703          | 1318      | 406         | 912      | 304      | <i>E2</i>                    | <i>rE2/3<math>\delta</math>/7</i> | $\delta$       | e                | a       |
| 2      | 2-021    | EF607704          | 1542      | 411         | 1131     | 377      | <i>D1</i>                    | <i>rD1/6/7</i>                    | $\alpha$       | d                | b       |
| 2      | 2-022    | EF607705          | 1542      | 411         | 1131     | 377      | <i>D1</i>                    | <i>rD1/6/7</i>                    | $\alpha$       | d                | b       |
| 2      | 2-023    | EF607706          | 1542      | 411         | 1131     | 377      | <i>D1</i>                    | <i>rD1/6/7</i>                    | $\alpha$       | d                | b       |
| 2      | 2-024    | EF607707          | 1544      | 413         | 1131     | 377      | <i>D1</i>                    | <i>rD1/6/7</i>                    | $\alpha$       | d                | b       |
| 2      | 2-025    | EF607708          | 1318      | 406         | 912      | 304      | <i>E2</i>                    | <i>rE2/3<math>\delta</math>/7</i> | $\delta$       | e                | a       |
| 2      | 2-026    | EF607709          | 1544      | 413         | 1131     | 377      | <i>D1</i>                    | <i>rD1/6/7</i>                    | $\alpha$       | d                | b       |
| 2      | 2-027    | EF607710          | 1542      | 411         | 1131     | 377      | <i>D1</i>                    | <i>rD1/6/7</i>                    | $\alpha$       | d                | b       |
| 2      | 2-028    | EF607711          | 1542      | 411         | 1131     | 377      | <i>D1</i>                    | <i>rD1/6/7</i>                    | $\alpha$       | d                | b       |
| 2      | 2-029    | EF607712          | 1335      | 405         | 930      | 310      | <i>E2</i>                    | <i>rE2/3<math>\delta</math>/7</i> | $\delta$       | e                | a       |
| 2      | 2-031    | EF607713          | 1335      | 405         | 930      | 310      | <i>E8</i>                    | <i>rE2/3<math>\delta</math>/7</i> | $\delta$       | e                | b       |
| 2      | 2-032    | EF607714          | 1543      | 412         | 1131     | 377      | <i>D1</i>                    | <i>rD1/6/7</i>                    | $\alpha$       | d                | b       |
| 2      | 2-033    | EF607715          | 1318      | 406         | 912      | 304      | <i>E2</i>                    | <i>rE2/3<math>\delta</math>/7</i> | $\delta$       | e                | a       |
| 2      | 2-034    | EF607716          | 1894      | 412         | 1482     | 494      | <i>A1</i>                    | <i>rA1</i>                        | $\gamma$       | a                | b       |
| 2      | 2-035    | EF607717          | 1333      | 406         | 927      | 309      | <i>E3<math>\delta</math></i> | <i>rE2/3<math>\delta</math>/7</i> | $\delta$       | e                | a       |
| 2      | 2-036    | EF607718          | 1894      | 412         | 1482     | 494      | <i>A1</i>                    | <i>rA1</i>                        | $\gamma$       | a                | b       |

| Animal | Sequence | Genbank<br>Acc. # | Gene (Nt) | Intron (Nt) | ORF (Nt) | ORF (aa) | cDNA<br>Pattern | RBA<br>Pattern  | Intron<br>Type | 10/15<br>Subtype | 25 stop |
|--------|----------|-------------------|-----------|-------------|----------|----------|-----------------|-----------------|----------------|------------------|---------|
| 2      | 2-037    | EF607719          | 1333      | 406         | 927      | 309      | <i>E3δ</i>      | <i>rE2/3δ/7</i> | δ              | e                | a       |
| 2      | 2-038    | EF607720          | 1542      | 411         | 1131     | 377      | <i>D1</i>       | <i>rD1/6/7</i>  | α              | d                | b       |
| 2      | 2-039    | EF607721          | 1542      | 411         | 1131     | 377      | <i>D1</i>       | <i>rD1/6/7</i>  | α              | d                | b       |
| 2      | 2-040    | EF607722          | 1440      | 414         | 1026     | 342      | <i>F1</i>       | <i>rF1/2</i>    | β              | f                | b       |
| 2      | 2-041    | EF607723          | 1231      | 406         | 825      | 275      | <i>01δ</i>      | <i>r01δ/2</i>   | δ              | 0                | b       |
| 2      | 2-047    | EF607724          | 1333      | 406         | 927      | 309      | <i>E3δ</i>      | <i>rE2/3δ/7</i> | δ              | e                | a       |
| 2      | 2-048    | EF607725          | 1542      | 411         | 1131     | 377      | <i>D1</i>       | <i>rD1/6/7</i>  | α              | d                | b       |
| 2      | 2-049    | EF607726          | 1228      | 406         | 822      | 274      | <i>01δ</i>      | <i>r01δ/8</i>   | δ              | 0                | b       |
| 2      | 2-050    | EF607727          | 1228      | 406         | 822      | 274      | <i>08</i>       | <i>r01δ/8</i>   | δ              | 0                | a       |
| 2      | 2-052    | EF607728          | 1544      | 413         | 1131     | 377      | <i>D1</i>       | <i>rD1/6/7</i>  | α              | d                | b       |
| 2      | 2-055    | EF607729          | 1433      | 407         | 1026     | 342      | <i>B3α</i>      | <i>rB3α</i>     | α              | b                | b       |
| 2      | 2-056    | EF607730          | 1541      | 410         | 1131     | 377      | <i>D1</i>       | <i>rD1/6/7</i>  | α              | d                | b       |
| 2      | 2-057    | EF607731          | 1543      | 412         | 1131     | 377      | <i>D1</i>       | <i>rD1/6/7</i>  | α              | d                | b       |
| 2      | 2-059    | EF607732          | 1231      | 406         | 825      | 275      | <i>01δ</i>      | <i>r01δ/2</i>   | δ              | 0                | b       |
| 2      | 2-061    | EF607733          | 1398      | 411         | 987      | 329      | <i>E6</i>       | <i>rE6</i>      | α              | e                | a       |
| 2      | 2-063    | EF607734          | 1335      | 405         | 930      | 310      | <i>E2</i>       | <i>rE2/3δ/7</i> | δ              | e                | a       |
| 2      | 2-064    | EF607735          | 1542      | 411         | 1131     | 377      | <i>D1</i>       | <i>rD1/6/7</i>  | α              | d                | b       |
| 2      | 2-065    | EF607736          | 1246      | 406         | 840      | 280      | <i>01δ</i>      | <i>r01δ/2</i>   | δ              | 0                | b       |
| 2      | 2-066    | EF607737          | 1434      | 414         | 1020     | 340      | <i>F2</i>       | <i>rF1/2</i>    | β              | f                | b       |
| 2      | 2-067    | EF607738          | 1333      | 406         | 927      | 309      | <i>E3δ</i>      | <i>rE2/3δ/7</i> | δ              | e                | a       |
| 2      | 2-069    | EF607739          | 1231      | 406         | 825      | 275      | <i>01δ</i>      | <i>r01δ/2</i>   | δ              | 0                | b       |
| 2      | 2-070    | EF607740          | 1543      | 412         | 1131     | 377      | <i>D1</i>       | <i>rD1/6/7</i>  | α              | d                | b       |
| 2      | 2-071    | EF607741          | 1318      | 406         | 912      | 304      | <i>E2</i>       | <i>rE2/3δ/7</i> | δ              | e                | a       |
| 2      | 2-073    | EF607742          | 1327      | 406         | 921      | 307      | <i>E7</i>       | <i>rE2/3δ/7</i> | δ              | e                | b       |
| 2      | 2-076    | EF607743          | 1543      | 412         | 1131     | 377      | <i>D1</i>       | <i>rD1/6/7</i>  | α              | d                | b       |
| 2      | 2-077    | EF607744          | 1542      | 411         | 1131     | 377      | <i>D1</i>       | <i>rD1/6/7</i>  | α              | d                | b       |
| 2      | 2-079    | EF607745          | 1542      | 411         | 1131     | 377      | <i>D1</i>       | <i>rD1/6/7</i>  | α              | d                | b       |
| 2      | 2-080    | EF607746          | 1544      | 413         | 1131     | 377      | <i>D1</i>       | <i>rD1/6/7</i>  | α              | d                | b       |
| 2      | 2-081    | EF607747          | 1440      | 414         | 1026     | 342      | <i>F1</i>       | <i>rF1/2</i>    | β              | f                | b       |
| 2      | 2-082    | EF607748          | 1543      | 412         | 1131     | 377      | <i>D1</i>       | <i>rD1/6/7</i>  | α              | d                | b       |
| 2      | 2-083    | EF607749          | 1231      | 406         | 825      | 275      | <i>01δ</i>      | <i>r01δ/2</i>   | δ              | 0                | b       |

| Animal | Sequence | Genbank<br>Acc. # | Gene (Nt) | Intron (Nt) | ORF (Nt) | ORF (aa) | cDNA<br>Pattern | RBA<br>Pattern  | Intron<br>Type | 10/15<br>Subtype | 25 stop |
|--------|----------|-------------------|-----------|-------------|----------|----------|-----------------|-----------------|----------------|------------------|---------|
| 2      | 2-084    | EF607750          | 1231      | 406         | 825      | 275      | <i>01δ</i>      | <i>r01δ/2</i>   | δ              | 0                | b       |
| 2      | 2-089    | EF607751          | 1318      | 406         | 912      | 304      | <i>E2</i>       | <i>rE2/3δ/7</i> | δ              | e                | a       |
| 2      | 2-090    | EF607752          | 1335      | 405         | 930      | 310      | <i>E9</i>       | <i>rE2/3δ/7</i> | δ              | e                | c       |
| 2      | 2-091    | EF607753          | 1329      | 405         | 924      | 308      | <i>E9</i>       | <i>rE2/3δ/7</i> | δ              | e                | c       |
| 2      | 2-093    | EF607754          | 1440      | 414         | 1026     | 342      | <i>F1</i>       | <i>rF1/2</i>    | β              | f                | b       |
| 2      | 2-094    | EF607755          | 1335      | 405         | 930      | 310      | <i>E2</i>       | <i>rE2/3δ/7</i> | δ              | e                | a       |
| 2      | 2-095    | EF607756          | 1321      | 406         | 915      | 305      | <i>E2</i>       | <i>rE2/3δ/7</i> | δ              | e                | a       |
| 2      | 2-096    | EF607757          | 1440      | 414         | 1026     | 342      | <i>F1</i>       | <i>rF1/2</i>    | β              | f                | b       |
| 2      | 2-098    | EF607758          | 1544      | 413         | 1131     | 377      | <i>D1</i>       | <i>rD1/6/7</i>  | α              | d                | b       |
| 2      | 2-099    | EF607759          | 1318      | 406         | 912      | 304      | <i>E2</i>       | <i>rE2/3δ/7</i> | δ              | e                | a       |
| 2      | 2-101    | EF607680          | 1541      | 410         | 1131     | 377      | <i>D1</i>       | <i>rD1/6/7</i>  | α              | d                | b       |
| 2      | 2-102    | EF607681          | 1542      | 411         | 1131     | 377      | <i>D1</i>       | <i>rD1/6/7</i>  | α              | d                | b       |
| 2      | 2-103    | EF607682          | 1440      | 414         | 1026     | 342      | <i>F1</i>       | <i>rF1/2</i>    | β              | f                | b       |
| 2      | 2-104    | EF607683          | 1433      | 407         | 1026     | 342      | <i>B3α</i>      | <i>rB3α</i>     | α              | b                | b       |
| 2      | 2-105    | EF607684          | 1335      | 405         | 930      | 310      | <i>E2</i>       | <i>rE2/3δ/7</i> | δ              | e                | a       |
| 2      | 2-106    | EF607685          | 1543      | 412         | 1131     | 377      | <i>D1</i>       | <i>rD1/6/7</i>  | α              | d                | b       |
| 2      | 2-107    | EF607686          | 1334      | 407         | 927      | 309      | <i>E3δ</i>      | <i>rE2/3δ/7</i> | δ              | e                | a       |
| 2      | 2-109    | EF607687          | 1545      | 411         | 1134     | 378      | <i>D1</i>       | <i>rD1/6/7</i>  | α              | d                | b       |
| 2      | 2-110    | EF607689          | 1440      | 414         | 1026     | 342      | <i>F1</i>       | <i>rF1/2</i>    | β              | f                | b       |
| 2      | 2-111    | EF607690          | 1542      | 411         | 1131     | 377      | <i>D1</i>       | <i>rD1/6/7</i>  | α              | d                | b       |
| 2      | 2-112    | EF607691          | 1335      | 405         | 930      | 310      | <i>E2</i>       | <i>rE2/3δ/7</i> | δ              | e                | a       |
| 2      | 2-114    | EF607692          | 1318      | 406         | 912      | 304      | <i>E2</i>       | <i>rE2/3δ/7</i> | δ              | e                | a       |
| 2      | 2-115    | EF607693          | 1543      | 412         | 1131     | 377      | <i>D1</i>       | <i>rD1/6/7</i>  | α              | d                | b       |
| 2      | 2-116    | EF607694          | 1231      | 406         | 825      | 275      | <i>01δ</i>      | <i>r01δ/8</i>   | δ              | 0                | b       |
| 2      | 2-118    | EF607695          | 1318      | 406         | 912      | 304      | <i>E2</i>       | <i>rE2/3δ/7</i> | δ              | e                | a       |
| 2      | 2-119    | EF607696          | 1318      | 406         | 912      | 304      | <i>E2</i>       | <i>rE2/3δ/7</i> | δ              | e                | a       |
| 4      | 4-1501   | EF607760          | 1541      | 410         | 1131     | 377      | <i>D1</i>       | <i>rD1/6/7</i>  | α              | d                | b       |
| 4      | 4-1503   | EF607761          | 1227      | 405         | 822      | 274      | <i>01δ</i>      | <i>r01δ/2</i>   | δ              | 0                | b       |
| 4      | 4-1508   | EF607762          | 1227      | 405         | 822      | 274      | <i>01δ</i>      | <i>r01δ/2</i>   | δ              | 0                | b       |
| 4      | 4-1511   | EF607763          | 1550      | 410         | 1140     | 380      | <i>D6</i>       | <i>rD1/6/7</i>  | α              | d                | b       |
| 4      | 4-1513   | EF607764          | 1227      | 405         | 822      | 274      | <i>01δ</i>      | <i>r01δ/8</i>   | δ              | 0                | b       |

| Animal | Sequence | Genbank<br>Acc. # | Gene (Nt) | Intron (Nt) | ORF (Nt) | ORF (aa) | cDNA<br>Pattern | RBA<br>Pattern       | Intron<br>Type | 10/15<br>Subtype | 25 stop |
|--------|----------|-------------------|-----------|-------------|----------|----------|-----------------|----------------------|----------------|------------------|---------|
| 4      | 4-1515   | EF607765          | 1547      | 410         | 1137     | 379      | <i>D1</i>       | <i>rD1/6/7</i>       | $\alpha$       | d                | b       |
| 4      | 4-1516   | EF607766          | 1481      | 410         | 1071     | 357      | <i>C3</i>       | <i>rC3</i>           | $\alpha$       | c                | b       |
| 4      | 4-1517   | EF607767          | 1227      | 405         | 822      | 274      | <i>01\delta</i> | <i>r01\delta/8</i>   | $\delta$       | 0                | b       |
| 4      | 4-1518   | EF607768          | 1227      | 405         | 822      | 274      | <i>01\delta</i> | <i>r01\delta/8</i>   | $\delta$       | 0                | b       |
| 4      | 4-1520   | EF607769          | 1333      | 406         | 927      | 309      | <i>E3\delta</i> | <i>rE2/3\delta/7</i> | $\delta$       | e                | a       |
| 4      | 4-1521   | EF607770          | 1458      | 414         | 1044     | 348      | <i>B3\beta</i>  | <i>rB3\beta</i>      | $\beta$        | b                | b       |
| 4      | 4-1523   | EF607771          | 1550      | 410         | 1140     | 380      | <i>D1</i>       | <i>rD1/6/7</i>       | $\alpha$       | d                | b       |
| 4      | 4-1527   | EF607772          | 1227      | 405         | 822      | 274      | <i>01\delta</i> | <i>r01\delta/8</i>   | $\delta$       | 0                | b       |
| 4      | 4-1528   | EF607773          | 1414      | 409         | 1005     | 335      | <i>E10</i>      | <i>rE10</i>          | $\gamma$       | e                | a       |
| 4      | 4-1530   | EF607774          | 1545      | 411         | 1134     | 378      | <i>D1</i>       | <i>rD1/6/7</i>       | $\alpha$       | d                | b       |
| 4      | 4-1531   | EF607775          | 1333      | 406         | 927      | 309      | <i>E3\delta</i> | <i>rE2/3\delta/7</i> | $\delta$       | e                | a       |
| 4      | 4-1532   | EF607776          | 1334      | 407         | 927      | 309      | <i>E3\delta</i> | <i>rE2/3\delta/7</i> | $\delta$       | e                | a       |
| 4      | 4-1533   | EF607777          | 1333      | 406         | 927      | 309      | <i>E3\delta</i> | <i>rE2/3\delta/7</i> | $\delta$       | e                | a       |
| 4      | 4-1534   | EF607778          | 1458      | 414         | 1044     | 348      | <i>B3\beta</i>  | <i>rB3\beta</i>      | $\beta$        | b                | b       |
| 4      | 4-1535   | EF607779          | 1227      | 405         | 822      | 274      | <i>01\delta</i> | <i>r01\delta/2</i>   | $\delta$       | 0                | b       |
| 4      | 4-1536   | EF607780          | 1310      | 410         | 900      | 300      | <i>C5</i>       | <i>rC5</i>           | $\alpha$       | c                | b       |
| 4      | 4-1538   | EF607781          | 1551      | 411         | 1140     | 380      | <i>D1</i>       | <i>rD1/6/7</i>       | $\alpha$       | d                | b       |
| 4      | 4-1541   | EF607782          | 1541      | 410         | 1131     | 377      | <i>D1</i>       | <i>rD1/6/7</i>       | $\alpha$       | d                | b       |
| 4      | 4-1542   | EF607783          | 1333      | 406         | 927      | 309      | <i>E3\delta</i> | <i>rE2/3\delta/7</i> | $\delta$       | e                | a       |
| 4      | 4-1543   | EF607784          | 1544      | 410         | 1134     | 378      | <i>D1</i>       | <i>rD1/6/7</i>       | $\alpha$       | d                | b       |
| 4      | 4-1544   | EF607785          | 1481      | 410         | 1071     | 357      | <i>C3</i>       | <i>rC3</i>           | $\alpha$       | c                | b       |
| 4      | 4-1545   | EF607786          | 1556      | 410         | 1146     | 382      | <i>C2</i>       | <i>rC2</i>           | $\alpha$       | c                | b       |
| 4      | 4-1547   | EF607787          | 1227      | 405         | 822      | 274      | <i>01\delta</i> | <i>r01\delta/8</i>   | $\delta$       | 0                | b       |
| 4      | 4-1548   | EF607788          | 1458      | 414         | 1044     | 348      | <i>B3\beta</i>  | <i>rB3\beta</i>      | $\beta$        | b                | b       |
| 4      | 4-1550   | EF607789          | 1336      | 406         | 930      | 310      | <i>E2</i>       | <i>rE2/3\delta/7</i> | $\delta$       | e                | a       |
| 4      | 4-2410   | EF607790          | 1542      | 411         | 1131     | 377      | <i>D1</i>       | <i>rD1/6/7</i>       | $\alpha$       | d                | b       |
| 4      | 4-2412   | EF607791          | 1541      | 410         | 1131     | 377      | <i>D1</i>       | <i>rD1/6/7</i>       | $\alpha$       | d                | b       |
| 4      | 4-2415   | EF607792          | 1458      | 414         | 1044     | 348      | <i>B3\beta</i>  | <i>rB3\beta</i>      | $\beta$        | b                | b       |
| 4      | 4-2449   | EF607793          | 1541      | 410         | 1131     | 377      | <i>D1</i>       | <i>rD1/6/7</i>       | $\alpha$       | d                | b       |
| 10     | 10-001   | EF607621          | 1446      | 402         | 1044     | 348      | <i>B3\beta</i>  | <i>rB3\beta</i>      | $\beta$        | b                | b       |
| 10     | 10-002   | EF607622          | 1446      | 402         | 1044     | 348      | <i>B3\beta</i>  | <i>rB3\beta</i>      | $\beta$        | b                | b       |

| Animal | Sequence | Genbank<br>Acc. # | Gene (Nt) | Intron (Nt) | ORF (Nt) | ORF (aa) | cDNA<br>Pattern | RBA<br>Pattern  | Intron<br>Type | 10/15<br>Subtype | 25 stop |
|--------|----------|-------------------|-----------|-------------|----------|----------|-----------------|-----------------|----------------|------------------|---------|
| 10     | 10-003   | EF607623          | 1228      | 406         | 822      | 274      | <i>01δ</i>      | <i>r01δ/2</i>   | δ              | 0                | b       |
| 10     | 10-004   | EF607624          | 1446      | 387         | 1059     | 353      | <i>D5</i>       | <i>rD5</i>      | ε              | d                | b       |
| 10     | 10-005   | EF607625          | 1446      | 387         | 1059     | 353      | <i>D5</i>       | <i>rD5</i>      | ε              | d                | b       |
| 10     | 10-006   | EF607626          | 1541      | 410         | 1131     | 377      | <i>D1</i>       | <i>rD1/6/7</i>  | α              | d                | b       |
| 10     | 10-007   | EF607627          | 1329      | 387         | 942      | 314      | <i>B6</i>       | <i>rB6</i>      | ε              | b                | b       |
| 10     | 10-008   | EF607628          | 1337      | 407         | 930      | 310      | <i>E2</i>       | <i>rE2/3δ/7</i> | δ              | e                | a       |
| 10     | 10-010   | EF607629          | 1891      | 409         | 1482     | 494      | <i>G2</i>       | <i>rG2</i>      | γ              | g                | b       |
| 10     | 10-011   | EF607630          | 1440      | 402         | 1038     | 346      | <i>B5</i>       | <i>rB3β</i>     | β              | b                | b       |
| 10     | 10-012   | EF607631          | 1446      | 402         | 1044     | 348      | <i>B3β</i>      | <i>rB3β</i>     | β              | b                | b       |
| 10     | 10-013   | EF607632          | 1474      | 409         | 1065     | 355      | <i>G3</i>       | <i>rG3</i>      | γ              | g                | b       |
| 10     | 10-014   | EF607633          | 1541      | 410         | 1131     | 377      | <i>D1</i>       | <i>rD1/6/7</i>  | α              | d                | b       |
| 10     | 10-015   | EF607634          | 1540      | 409         | 1131     | 377      | <i>D1</i>       | <i>rD1/6/7</i>  | α              | d                | b       |
| 10     | 10-017   | EF607635          | 1448      | 407         | 1041     | 347      | <i>B3α</i>      | <i>rB3α</i>     | α              | b                | b       |
| 10     | 10-018   | EF607636          | 1329      | 387         | 942      | 314      | <i>B6</i>       | <i>rB6</i>      | ε              | b                | b       |
| 10     | 10-019   | EF607637          | 1519      | 409         | 1110     | 370      | <i>B2</i>       | <i>rB2</i>      | α              | b                | b       |
| 10     | 10-020   | EF607638          | 1337      | 407         | 930      | 310      | <i>E2</i>       | <i>rE2/3δ/7</i> | δ              | e                | a       |
| 10     | 10-021   | EF607639          | 1541      | 410         | 1131     | 377      | <i>D1</i>       | <i>rD1/6/7</i>  | α              | d                | b       |
| 10     | 10-022   | EF607640          | 1541      | 410         | 1131     | 377      | <i>D1</i>       | <i>rD1/6/7</i>  | α              | d                | b       |
| 10     | 10-024   | EF607641          | 1546      | 409         | 1137     | 379      | <i>D6</i>       | <i>rD1/6/7</i>  | α              | d                | b       |
| 10     | 10-025   | EF607642          | 1228      | 406         | 822      | 274      | <i>01ε</i>      | <i>r01ε</i>     | δ              | 0                | b       |
| 10     | 10-026   | EF607643          | 1337      | 407         | 930      | 310      | <i>E2</i>       | <i>rE2/3δ/7</i> | δ              | e                | a       |
| 10     | 10-027   | EF607644          | 1337      | 407         | 930      | 310      | <i>E2</i>       | <i>rE2/3δ/7</i> | δ              | e                | a       |
| 10     | 10-028   | EF607645          | 1206      | 381         | 825      | 275      | <i>01ε</i>      | <i>r01ε</i>     | ε              | 0                | b       |
| 10     | 10-029   | EF607646          | 1228      | 406         | 822      | 274      | <i>01δ</i>      | <i>r01δ/8</i>   | δ              | 0                | b       |
| 10     | 10-030   | EF607647          | 1228      | 406         | 822      | 274      | <i>01δ</i>      | <i>r01δ/8</i>   | δ              | 0                | b       |
| 10     | 10-031   | EF607648          | 1451      | 407         | 1044     | 348      | <i>B3α</i>      | <i>rB3α</i>     | α              | b                | b       |
| 10     | 10-032   | EF607649          | 1228      | 406         | 822      | 274      | <i>01δ</i>      | <i>r01δ/8</i>   | δ              | 0                | b       |
| 10     | 10-034   | EF607650          | 1228      | 406         | 822      | 274      | <i>01δ</i>      | <i>r01δ/8</i>   | δ              | 0                | b       |
| 10     | 10-035   | EF607651          | 1478      | 410         | 1068     | 356      | <i>C3</i>       | <i>rC3</i>      | α              | c                | b       |
| 10     | 10-037   | EF607652          | 1227      | 405         | 822      | 274      | <i>01δ</i>      | <i>r01δ/8</i>   | δ              | 0                | b       |
| 10     | 10-038   | EF607653          | 1228      | 406         | 822      | 274      | <i>01δ</i>      | <i>r01δ/8</i>   | δ              | 0                | b       |

| Animal | Sequence | Genbank<br>Acc. # | Gene (Nt) | Intron (Nt) | ORF (Nt) | ORF (aa) | cDNA<br>Pattern | RBA<br>Pattern | Intron<br>Type | 10/15<br>Subtype | 25 stop |
|--------|----------|-------------------|-----------|-------------|----------|----------|-----------------|----------------|----------------|------------------|---------|
| 10     | 10-039   | EF607654          | 1446      | 402         | 1044     | 348      | <i>B3β</i>      | <i>rB3β</i>    | β              | b                | b       |
| 10     | 10-040   | EF607655          | 1433      | 407         | 1026     | 342      | <i>B3α</i>      | <i>rB3α</i>    | α              | b                | b       |
| 10     | 10-042   | EF607656          | 1446      | 402         | 1044     | 348      | <i>B8</i>       | <i>rB3β</i>    | β              | b                | c       |
| 10     | 10-043   | EF607657          | 1446      | 402         | 1044     | 348      | <i>B8</i>       | <i>rB3β</i>    | β              | b                | c       |
| 10     | 10-045   | EF607658          | 1541      | 410         | 1131     | 377      | <i>D1</i>       | <i>rD1/6/7</i> | α              | d                | b       |
| 10     | 10-046   | EF607659          | 1228      | 406         | 822      | 274      | <i>01δ</i>      | <i>r01δ/8</i>  | δ              | 0                | b       |
| 10     | 10-048   | EF607660          | 1228      | 406         | 822      | 274      | <i>01δ</i>      | <i>r01δ/8</i>  | δ              | 0                | b       |
| 10     | 10-049   | EF607661          | 1541      | 410         | 1131     | 377      | <i>D1</i>       | <i>rD1/6/7</i> | α              | d                | b       |
| 10     | 10-050   | EF607662          | 1478      | 410         | 1068     | 356      | <i>C3</i>       | <i>rC3</i>     | α              | c                | b       |
| 10     | 10-051   | EF607663          | 1451      | 410         | 1041     | 347      | <i>B3α</i>      | <i>rB3α</i>    | α              | b                | b       |
| 10     | 10-052   | EF607664          | 1232      | 410         | 822      | 274      | <i>01α</i>      | <i>r01α</i>    | α              | 0                | b       |
| 10     | 10-053   | EF607665          | 1228      | 406         | 822      | 274      | <i>01δ</i>      | <i>r01δ/8</i>  | δ              | 0                | b       |
| 10     | 10-054   | EF607666          | 1349      | 410         | 939      | 313      | <i>B7</i>       | <i>rB7</i>     | α              | b                | b       |
| 10     | 10-055   | EF607667          | 1547      | 410         | 1137     | 379      | <i>D1</i>       | <i>rD1/6/7</i> | α              | d                | b       |
| 10     | 10-056   | EF607668          | 1541      | 410         | 1131     | 377      | <i>D1</i>       | <i>rD1/6/7</i> | α              | d                | b       |
| 10     | 10-057   | EF607669          | 1541      | 410         | 1131     | 377      | <i>D1</i>       | <i>rD1/6/7</i> | α              | d                | b       |
| 10     | 10-058   | EF607670          | 1228      | 406         | 822      | 274      | <i>01δ</i>      | <i>r01δ/8</i>  | δ              | 0                | b       |
