# Supplementary material for: Extraordinary diversity among members of the large gene family, 185/333, from the purple sea urchin, Strongylocentrotus purpuratus
Source: PubMed Central journal article supplement (PMC1988830; doi:10.1186/1471-2199-8-68), 2007-08-15
Supplement: 1471-2199-8-68-S2.pdf [file 1471-2199-8-68-S2.pdf]

**Additional File 2: cDNA-based nucleotide alignment of the gene sequences.** Element borders are indicated by vertical black lines, and are labeled above the sequence. Repeats are indicated by shaded boxes, which each different color (red = type 1; blue = type 2; green = type 3; yellow = type 4; and purple = type 5). Stop codons are shown in red boxes. The conserved splice signals are indicated by blue boxes. Conserved stretches in the alignment (minimum of 8 nt long, with a maximum average entropy of 0.02 and maximum entropy per position of 0.2) are indicated by green boxes above the alignment. Sites that are polymorphic in five of the eight sets are shown by red arrows; positions polymorphic in four of the eight sets are indicated by orange arrows.



















|        | 730    | 740             | 750   | 760  | 770                                          | 780   | 790             | 800   | 810             | 820                | 830                 | 840                   | 850                 | 860          | 870             | 880             | 890             | 900         |     |     |
|--------|--------|-----------------|-------|------|----------------------------------------------|-------|-----------------|-------|-----------------|--------------------|---------------------|-----------------------|---------------------|--------------|-----------------|-----------------|-----------------|-------------|-----|-----|
| 2-05   | ...Ex5 |                 |       |      |                                              |       |                 | Ex6   |                 |                    |                     |                       |                     |              | Ex7...          |                 |                 |             |     |     |
| 2-05   |        |                 |       |      |                                              |       |                 | AGGTT | CGATGGACCTGGATT | TTGGT              | CCCC                | GGAGATGGATGGACGGAGACA | AAAAATGGCGTCCGATGGG | TGGAAGCAGATT | CGACGGACCTGGATT | TTGGTGGCTCC     | AG              | 784         |     |     |
| 2-06   |        |                 |       |      |                                              |       |                 |       |                 |                    |                     |                       |                     |              |                 | AGATT           | CGACGGACCTGGATT | TTGGTGGCTCC | AG  | 713 |
| 2-07   |        |                 |       |      |                                              |       |                 | AGGTT | CGATGGACCTGGATT | TTGGT              | CCCC                | GGAGATGGATGGACGGAGACA | AAAAATGGCGTCCGATGGG | TGGAAGCAGATT | CGACGGACCTGGATT | TTGGTGGCTCC     | AG              | 782         |     |     |
| 2-08   |        |                 |       |      |                                              |       |                 | AGGTT | CGATGGACCTGGATT | TTGGT              | CCCC                | GGAGATGGATGGACGGAGACA | AAAAATGGCGTCCGATGGG | TGGAAGCAGATT | CGACGGACCTGGATT | TTGGTGGCTCC     | AG              | 782         |     |     |
| 2-09   |        |                 |       |      |                                              |       |                 |       |                 |                    |                     |                       |                     |              |                 | AGATT           | CGACGGACCTGGATT | TTGGTGGCTCC | AG  | 713 |
| 2-11   |        |                 |       |      |                                              |       |                 |       |                 |                    |                     |                       |                     |              |                 | AGATT           | CGACGGACCTGGATT | TTGGTGGCTCC | AG  | 702 |
| 2-12   |        |                 |       |      |                                              |       |                 |       |                 |                    |                     |                       |                     |              |                 | AGATT           | CGACGGACCTGGATT | TTGGTGGCTCC | AG  | 702 |
| 2-15   |        |                 |       |      |                                              |       |                 |       |                 |                    |                     |                       |                     |              |                 | AGATT           | CGACGGACCTGGATT | TTGGTGGCTCC | AG  | 704 |
| 2-17   |        |                 |       |      |                                              |       |                 |       |                 |                    |                     |                       |                     |              |                 | AGGTT           | CGATGGACCTGGATT | TTGGTGGCTCC | AG  | 707 |
| 2-18   |        |                 |       |      |                                              |       |                 |       |                 |                    |                     |                       |                     |              |                 | AGATT           | CGACGGACCTGGATT | TTGGTGGCTCC | AG  | 783 |
| 2-20   |        |                 |       |      |                                              |       |                 |       |                 |                    |                     |                       |                     |              |                 | AGATT           | CGACGGACCTGGATT | TTGGTGGCTCC | AG  | 702 |
| 2-21   |        |                 |       |      |                                              |       |                 | AGGTT | CGATGGACCTGGATT | TTGGT              | CCCC                | GGAGATGGATGGACGGAGACA | AAAAATGGCGTCCGATGGG | TGGAAGCAGATT | CGACGGACCTGGATT | TTGGTGGCTCC     | AG              | 782         |     |     |
| 2-24   |        |                 |       |      |                                              |       |                 | AGGTT | CGATGGACCTGGATT | TTGGT              | CCCC                | GGAGATGGATGGACGGAGACA | AAAAATGGCGTCCGATGGG | TGGAAGCAGATT | CGACGGACCTGGATT | TTGGTGGCTCC     | AG              | 784         |     |     |
| 2-25   |        |                 |       |      |                                              |       |                 |       |                 |                    |                     |                       |                     |              |                 | AGATT           | CGACGGACCTGGATT | TTGGTGGCTCC | AG  | 702 |
| 2-28   |        |                 |       |      |                                              |       |                 | AGGTT | CGATGGACCTGGATT | TTGGT              | CCCC                | GGAGATGGATGGACGGAGACA | AAAAATGGCGTCCGATGGG | TGGAAGCAGATT | CGACGGACCTGGATT | TTGGTGGCTCC     | AG              | 782         |     |     |
| 2-34   | GTT    | CGATGGACCTGGATT | TTGGT | CCCC | CGCGATGGTGGACCAAGGCAAGATGGTGGACCAATGGTGGAAAG | AGGTT | CGATGGACCTGGATT | TTGGT | CCCC            | CGAAATGGTGGACCTAGG | CAAAATGGCGTCCGATGGG | TGTAGCAGATT           | CGACGGACCTGGATT     | TTGGTGGCTCC  | AG              | 858             |                 |             |     |     |
| 2-35   |        |                 |       |      |                                              |       |                 |       |                 |                    |                     |                       |                     |              | AGATT           | CGACGGACCTGGATT | TTGGTGGCTCC     | AG          | 702 |     |
| 2-36   | GTT    | CGATGGACCTGGATT | TTGGT | CCCC | CGCGATGGTGGACCAAGGCAAGATGGTGGACCAATGGTGGAAAG | AGGTT | CGATGGACCTGGATT | TTGGT | CCCC            | CGAAATGGTGGACCTAGG | CAAAATGGCGTCCGATGGG | TGTAGCAGATT           | CGACGGACCTGGATT     | TTGGTGGCTCC  | AG              | 858             |                 |             |     |     |
| 2-37   |        |                 |       |      |                                              |       |                 |       |                 |                    |                     |                       |                     |              | AGATT           | CGACGGACCTGGATT | TTGGTGGCTCC     | AG          | 702 |     |
| 2-38   |        |                 |       |      |                                              |       |                 |       |                 |                    |                     |                       |                     |              | AGATT           | CGACGGACCTGGATT | TTGGTGGCTCC     | AG          | 782 |     |
| 2-47   |        |                 |       |      |                                              |       |                 |       |                 |                    |                     |                       |                     |              | AGATT           | CGACGGACCTGGATT | TTGGTGGCTCC     | AG          | 702 |     |
| 2-50   |        |                 |       |      |                                              |       |                 |       |                 |                    |                     |                       |                     |              | AGATT           | CGACGGACCTGGATT | TTGGTGGCTCC     | AG          | 702 |     |
| 2-52   |        |                 |       |      |                                              |       |                 |       |                 |                    |                     |                       |                     |              | AGATT           | CGACGGACCTGGATT | TTGGTGGCTCC     | AG          | 784 |     |
| 2-55   |        |                 |       |      |                                              |       |                 |       |                 |                    |                     |                       |                     |              | AGATT           | CGACGGACCTGGATT | TTGGTGGCTCC     | AG          | 703 |     |
| 2-56   |        |                 |       |      |                                              |       |                 |       |                 |                    |                     |                       |                     |              | AGATT           | CGACGGACCTGGATT | TTGGTGGCTCC     | AG          | 781 |     |
| 2-57   |        |                 |       |      |                                              |       |                 |       |                 |                    |                     |                       |                     |              | AGATT           | CGACGGACCTGGATT | TTGGTGGCTCC     | AG          | 783 |     |
| 2-59   |        |                 |       |      |                                              |       |                 |       |                 |                    |                     |                       |                     |              | AGATT           | CGACGGACCTGGATT | TTGGTGGCTCC     | AG          | 705 |     |
| 2-61   |        |                 |       |      |                                              |       |                 |       |                 |                    |                     |                       |                     |              | AGATT           | CGACGGACCTGGATT | TTGGTGGCTCC     | AG          | 782 |     |
| 2-63   |        |                 |       |      |                                              |       |                 |       |                 |                    |                     |                       |                     |              | AGATT           | CGACGGACCTGGATT | TTGGTGGCTCC     | AG          | 704 |     |
| 2-64   |        |                 |       |      |                                              |       |                 |       |                 |                    |                     |                       |                     |              | AGATT           | CGACGGACCTGGATT | TTGGTGGCTCC     | AG          | 782 |     |
| 2-65   |        |                 |       |      |                                              |       |                 |       |                 |                    |                     |                       |                     |              | AGATT           | CGACGGACCTGGATT | TTGGTGGCTCC     | AG          | 705 |     |
| 2-66   |        |                 |       |      |                                              |       |                 |       |                 |                    |                     |                       |                     |              | AGATT           | CGACGGACCTGGATT | TTGGTGGCTCC     | AG          | 713 |     |
| 2-67   |        |                 |       |      |                                              |       |                 |       |                 |                    |                     |                       |                     |              | AGATT           | CGACGGACCTGGATT | TTGGTGGCTCC     | AG          | 702 |     |
| 2-73   |        |                 |       |      |                                              |       |                 |       |                 |                    |                     |                       |                     |              | AGATT           | CGACGGACCTGGATT | TTGGTGGCTCC     | AG          | 702 |     |
| 2-76   |        |                 |       |      |                                              |       |                 |       |                 |                    |                     |                       |                     |              | AGATT           | CGACGGACCTGGATT | TTGGTGGCTCC     | AG          | 783 |     |
| 2-77   |        |                 |       |      |                                              |       |                 |       |                 |                    |                     |                       |                     |              | AGATT           | CGACGGACCTGGATT | TTGGTGGCTCC     | AG          | 782 |     |
| 2-79   |        |                 |       |      |                                              |       |                 |       |                 |                    |                     |                       |                     |              | AGATT           | CGACGGACCTGGATT | TTGGTGGCTCC     | AG          | 782 |     |
| 2-82   |        |                 |       |      |                                              |       |                 |       |                 |                    |                     |                       |                     |              | AGATT           | CGACGGACCTGGATT | TTGGTGGCTCC     | AG          | 783 |     |
| 2-84   |        |                 |       |      |                                              |       |                 |       |                 |                    |                     |                       |                     |              | AGATT           | CGACGGACCTGGATT | TTGGTGGCTCC     | AG          | 705 |     |
| 2-90   |        |                 |       |      |                                              |       |                 |       |                 |                    |                     |                       |                     |              | AGATT           | CGACGGACCTGGATT | TTGGTGGCTCC     | AG          | 704 |     |
| 2-91   |        |                 |       |      |                                              |       |                 |       |                 |                    |                     |                       |                     |              | AGATT           | CGACGGACCTGGATT | TTGGTGGCTCC     | AG          | 704 |     |
| 2-95   |        |                 |       |      |                                              |       |                 |       |                 |                    |                     |                       |                     |              | AGATT           | CGACGGACCTGGATT | TTGGTGGCTCC     | AG          | 705 |     |
| 2-102  |        |                 |       |      |                                              |       |                 |       |                 |                    |                     |                       |                     |              | AGATT           | CGACGGACCTGGATT | TTGGTGGCTCC     | AG          | 782 |     |
| 2-103  |        |                 |       |      |                                              |       |                 |       |                 |                    |                     |                       |                     |              | AGATT           | CGACGGACCTGGATT | TTGGTGGCTCC     | AG          | 713 |     |
| 2-105  |        |                 |       |      |                                              |       |                 |       |                 |                    |                     |                       |                     |              | AGATT           | CGACGGACCTGGATT | TTGGTGGCTCC     | AG          | 704 |     |
| 2-106  |        |                 |       |      |                                              |       |                 |       |                 |                    |                     |                       |                     |              | AGATT           | CGACGGACCTGGATT | TTGGTGGCTCC     | AG          | 783 |     |
| 2-107  |        |                 |       |      |                                              |       |                 |       |                 |                    |                     |                       |                     |              | AGATT           | CGACGGACCTGGATT | TTGGTGGCTCC     | AG          | 703 |     |
| 2-109  |        |                 |       |      |                                              |       |                 |       |                 |                    |                     |                       |                     |              | AGATT           | CGACGGACCTGGATT | TTGGTGGCTCC     | AG          | 785 |     |
| 2-111  |        |                 |       |      |                                              |       |                 |       |                 |                    |                     |                       |                     |              | AGATT           | CGACGGACCTGGATT | TTGGTGGCTCC     | AG          | 782 |     |
| 2-115  |        |                 |       |      |                                              |       |                 |       |                 |                    |                     |                       |                     |              | AGATT           | CGACGGACCTGGATT | TTGGTGGCTCC     | AG          | 783 |     |
| 2-116  |        |                 |       |      |                                              |       |                 |       |                 |                    |                     |                       |                     |              | AGATT           | CGACGGACCTGGATT | TTGGTGGCTCC     | AG          | 705 |     |
| 2-118  |        |                 |       |      |                                              |       |                 |       |                 |                    |                     |                       |                     |              | AGATT           | CGACGGACCTGGATT | TTGGTGGCTCC     | AG          | 702 |     |
| 2-119  |        |                 |       |      |                                              |       |                 |       |                 |                    |                     |                       |                     |              | AGATT           | CGACGGACCTGGATT | TTGGTGGCTCC     | AG          | 702 |     |
| 4-1501 |        |                 |       |      |                                              |       |                 |       |                 |                    |                     |                       |                     |              | AGATT           | CGACGGACCTGGATT | TTGGTGGCTCC     | AG          | 781 |     |
| 4-1503 |        |                 |       |      |                                              |       |                 |       |                 |                    |                     |                       |                     |              | AGATT           | CGACGGACCTGGATT | TTGGTGGCTCC     | AG          | 701 |     |
| 4-1508 |        |                 |       |      |                                              |       |                 |       |                 |                    |                     |                       |                     |              | AGATT           | CGACGGACCTGGATT | TTGGTGGCTCC     | AG          | 701 |     |
| 4-1511 |        |                 |       |      |                                              |       |                 |       |                 |                    |                     |                       |                     |              | AGATT           | CGACGGACCTGGATT | TTGGTGGCTCC     | AG          | 784 |     |
| 4-1515 |        |                 |       |      |                                              |       |                 |       |                 |                    |                     |                       |                     |              | AGATT           | CGACGGACCTGGATT | TTGGTGGCTCC     | AG          | 781 |     |
| 4-1516 |        |                 |       |      |                                              |       |                 |       |                 |                    |                     |                       |                     |              | AGATT           | CGACGGACCTGGATT | TTGGTGGCTCC     | AG          | 709 |     |
| 4-1517 |        |                 |       |      |                                              |       |                 |       |                 |                    |                     |                       |                     |              | AGATT           | CGACGGACCTGGATT | TTGGTGGCTCC     | AG          | 701 |     |
| 4-1520 |        |                 |       |      |                                              |       |                 |       |                 |                    |                     |                       |                     |              | AGATT           | CGACGGACCTGGATT | TTGGTGGCTCC     | AG          | 702 |     |
| 4-1521 |        |                 |       |      |                                              |       |                 |       |                 |                    |                     |                       |                     |              | AGATT           | CGACGGACCTGGATT | TTGGTGGCTCC     | AG          | 713 |     |
| 4-1523 |        |                 |       |      |                                              |       |                 |       |                 |                    |                     |                       |                     |              | AGATT           | CGACGGACCTGGATT | TTGGTGGCTCC     | AG          | 784 |     |
| 4-1528 |        |                 |       |      |                                              |       |                 |       |                 |                    |                     |                       |                     |              | AGATT           | CGACGGACCTGGATT | TTGGTGGCTCC     | AG          | 783 |     |
| 4-1530 |        |                 |       |      |                                              |       |                 |       |                 |                    |                     |                       |                     |              | AGATT           | CGACGGACCTGGATT | TTGGTGGCTCC     | AG          | 785 |     |
| 4-1531 |        |                 |       |      |                                              |       |                 |       |                 |                    |                     |                       |                     |              | AGATT           | CGACGGACCTGGATT | TTGGTGGCTCC     | AG          | 702 |     |
| 4-1532 |        |                 |       |      |                                              |       |                 |       |                 |                    |                     |                       |                     |              | AGATT           | CGACGGACCTGGATT | TTGGTGGCTCC     | AG          | 703 |     |
| 4-1533 |        |                 |       |      |                                              |       |                 |       |                 |                    |                     |                       |                     |              | AGATT           | CGACGGACCTGGATT | TTGGTGGCTCC     | AG          | 702 |     |
| 4-1534 |        |                 |       |      |                                              |       |                 |       |                 |                    |                     |                       |                     |              | AGATT           | CGACGGACCTGGATT | TTGGTGGCTCC     | AG          | 713 |     |
| 4-1535 |        |                 |       |      |                                              |       |                 |       |                 |                    |                     |                       |                     |              | AGATT           | CGACGGACCTGGATT | TTGGTGGCTCC     | AG          | 701 |     |
| 4-1536 |        |                 |       |      |                                              |       |                 |       |                 |                    |                     |                       |                     |              | AGATT           | CGACGGACCTGGATT | TTGGTGGCTCC     | AG          | 706 |     |
| 4-1538 |        |                 |       |      |                                              |       |                 |       |                 |                    |                     |                       |                     |              | AGATT           | CGACGGACCTGGATT | TTGGTGGCTCC     | AG          | 785 |     |
| 4-1542 |        |                 |       |      |                                              |       |                 |       |                 |                    |                     |                       |                     |              | AGATT           | CGACGGACCTGGATT | TTGGTGGCTCC     | AG          | 702 |     |
| 4-1543 |        |                 |       |      |                                              |       |                 |       |                 |                    |                     |                       |                     |              | AGATT           | CGACGGACCTGGATT | TTGGTGGCTCC     | AG          | 784 |     |
| 4-1544 |        |                 |       |      |                                              |       |                 |       |                 |                    |                     |                       |                     |              | AGATT           | CGACGGACCTGGATT | TTGGTGGCTCC     | AG          | 709 |     |

...Repeat 1.2

Repeat 1.3

Repeat 1.4

...Ex5 Ex6 Ex7...

730 740 750 760 770 780 790 800 810 820 830 840 850 860 870 880 890 900

4-1545 AGGTTTCGATGGACCTGGATTGGTGCCCCGGAGATGGATGGACGGAGACAAAATGGCGGTCCGATGGGTGGAAGCAGATTTCGACGGACCTGGATTGGTGGCTCCAG 784

4-1547 AGATTTCGACGGACCTGGATTGGTGGCTCCAG 701

4-1548 AGATTTCGACGGACCTGGATTGGTGGCTCCAG 713

4-1550 AGATTTCGACGGACCTGGATTGGTGGCTCCAG 705

4-2410 AGGTTTCGATGGACCTGGATTGGTGCCCCGGAGATGGATGGACGGAGACAAAATGGCGGTCCGATGGGTGGAAGCAGATTTCGACGGACCTGGATTGGTGGCTCCAG 782

4-2412 AGGTTTCGATGGACCTGGATTGGTGCCCCGGAGATGGATGGACGGAGACAAAATGGCGGTCCGATGGGTGGAAGCAGATTTCGACGGACCTGGATTGGTGGCTCCAG 781

4-2415 AGATTTCGACGGACCTGGATTGGTGGCTCCAG 713

4-2449 AGGTTTCGATGGACCTGGATTGGTGCCCCGGAGATGGATGGACGGGACAAAATGGCGGTCCGATGGGTGGAAGCAGATTTCGACGGACCTGGATTGGTGGCTCCAG 781

10-01 AGATTTCGACGGACCTGGATTGGTGGCTCCAG 701

10-02 AGATTTCGACGGACCTGGATTGGTGGCTCCAG 701

10-03 AGATTTCGACGGACCTGGATTGGTGGCTCCAG 702

10-04 AGATTTCGACGGACCTGGATTGGTGGCTCCAG 686

10-06 GGGTTTCGATGGACCTGGAAATTGGTGCCCCGGAGATGGATGGACGGAGACAAAATGGCGGTCCGATGGGTGGAAGCAGATTTCGACGGACCTGGATTGGTGGCTCCAG 781

10-07 AGATTTCGACGGACCTGGATTGGTGGCTCCAG 686

10-10 GTTTCGATGGACCTAGATTGGTGCCCCACCGATGGGTGGACCAAGGCAAGATGGTGGACCAATGGGTGGAAGCAGATTTCGACGGACCTGGATTGGTGGCTCCAG 781

10-11 AGATTTCGACGGACCTGGATTGGTGGCTCCAG 701

10-13 GTTTCGATGGACCTAGATTGGTGCCCCACCGATGGGTGGACCAAGGCAAGATGGTGGACCAATGGGTGGAAGCAGATTTCGACGGACCTGGATTGGTGGCTCCAG 781

10-14 AGGTTTCGATGGACCTGGATTGGTGCCCCGGAGATGGATGGACGGAGACAAAATGGCGGTCCGATGGGTGGAAGCAGATTTCGACGGACCTGGATTGGTGGCTCCAG 781

10-15 AGGTTTCGATGGACCTGGATTGGTGCCCCGGAGATGGATGGACGGAGACAAAATGGCGGTCCGATGGGTGGAAGCAGATTTCGACGGACCTGGATTGGTGGCTCCAG 780

10-17 AGATTTCGACGGACCTGGATTGGTGGCTCCAG 703

10-18 AATTCGACCAACCTGAATTGGTGGCTCCAG 686

10-19 AGGTTTCGATGGACCTGGATTGGTGCCCCGGAGATGGATGGACGGAGACAAAATGGCGGTCCGATGGGTGGAAGCAGATTTCGACGGACCTGGATTGGTGGCTCCAG 780

10-20 AGATTTCGACGGACCTGGATTGGTGGCTCCAG 706

10-21 AGGTTTCGATGGACCTGGATTGGTGCCCCGGAGATGGATGGACGGAGACAAAATGGCGGTCCGATGGGTGGAAGCAGATTTCGACGGACCTGGATTGGTGGCTCCAG 781

10-22 AGGTTTCGATGGACCTGGATTGGTGCCCCGGAGATGGATGGACGGAGACAAAATGGCGGTCCGATGGGTGGAAGCAGATTTCGACGGACCTGGATTGGTGGCTCCAG 781

10-24 AGGTTTCGATGGACCTGGATTGGTGCCCCGGAGATGGATGGACGGAGACAAAATGGCGGTCCGATGGGTGGAAGCAGATTTCGACGGACCTGGATTGGTGGCTCCAG 780

10-25 AGATTTCGACGGACCTGGATTGGTGGCTCCAG 702

10-26 AGATTTCGACGGACCTGGATTGGTGGCTCCAG 706

10-28 AGATTTCGACGGACCTGGATTGGTGGCTCCAG 680

10-29 AGATTTCGACGGACCTGGATTGGTGGCTCCAG 702

10-30 AGATTTCGACGGACCTGGATTGGTGGCTCCAG 702

10-31 AGATTTCGACGGACCTGGATTGGTGGCTCCAG 706

10-32 AGATTTCGACGGACCTGGATTGGTGGCTCCAG 702

10-35 AGATTTCGACGGACCTGGATTGGTGGCTCCAG 706

10-37 AGATTTCGACGGACCTGGATTGGTGGCTCCAG 701

10-38 AGATTTCGACGGACCTGGATTGGTGGCTCCAG 702

10-39 AGATTTCGACGGACCTGGATTGGTGGCTCCAG 701

10-40 AGATTTCGACGGACCTGGATTGGTGGCTCCAG 703

10-42 AGATTTCGACGGACCTGGATTGGTGGCTCCAG 701

10-43 AGATTTCGACGGACCTGGATTGGTGGCTCCAG 701

10-46 AGATTTCGACGGACCTGGATTGGTGGCTCCAG 702

10-50 AGATTTCGACGGACCTGGATTGGTGGCTCCAG 706

10-51 AGATTTCGACGGACCTGGATTGGTGGCTCCAG 706

10-52 AGATTTCGACGGACCTGGATTGGTGGCTCCAG 706

10-54 AGATTTCGACGGACCTGGATTGGTGGCTCCAG 706

10-55 AGGTTTCGATGGACCTGGATTGGTGCCCCGGAGATGGATGGACGGAGACAAAATGGCGGTCCGATGGGTGGAAGCAGATTTCGACGGACCTGGATTGGTGGCTCCAG 781

...Repeat 1.2

Repeat 1.3

Repeat 1.4



















...Ex23...

|        | 1630          | 1640            | 1650               | 1660        | 1670           | 1680           | 1690             | 1700           | 1710        | 1720        | 1730         | 1740           | 1750        | 1760    | 1770 | 1780 | 1790 | 1800 |      |      |
|--------|---------------|-----------------|--------------------|-------------|----------------|----------------|------------------|----------------|-------------|-------------|--------------|----------------|-------------|---------|------|------|------|------|------|------|
| 2-05   |               |                 |                    |             |                |                |                  |                |             |             |              |                |             |         |      |      |      |      | 1358 |      |
| 2-06   |               |                 |                    |             |                |                |                  |                |             |             |              |                |             |         |      |      |      |      | 1188 |      |
| 2-07   |               |                 |                    |             |                |                |                  |                |             |             |              |                |             |         |      |      |      |      | 1356 |      |
| 2-08   |               |                 |                    |             |                |                |                  |                |             |             |              |                |             |         |      |      |      |      | 1356 |      |
| 2-09   |               |                 |                    |             |                |                |                  |                |             |             |              |                |             |         |      |      |      |      | 1188 |      |
| 2-11   |               |                 |                    |             |                |                |                  |                |             |             |              |                |             |         |      |      |      |      | 1141 |      |
| 2-12   |               |                 |                    |             |                |                |                  |                |             |             |              |                |             |         |      |      |      |      | 1141 |      |
| 2-15   |               |                 |                    |             |                |                |                  |                |             |             |              |                |             |         |      |      |      |      | 1083 |      |
| 2-17   |               |                 |                    |             |                |                |                  |                |             |             |              |                |             |         |      |      |      |      | 1146 |      |
| 2-18   |               |                 |                    |             |                |                |                  |                |             |             |              |                |             |         |      |      |      |      | 1357 |      |
| 2-20   |               |                 |                    |             |                |                |                  |                |             |             |              |                |             |         |      |      |      |      | 1141 |      |
| 2-21   |               |                 |                    |             |                |                |                  |                |             |             |              |                |             |         |      |      |      |      | 1356 |      |
| 2-24   |               |                 |                    |             |                |                |                  |                |             |             |              |                |             |         |      |      |      |      | 1358 |      |
| 2-25   |               |                 |                    |             |                |                |                  |                |             |             |              |                |             |         |      |      |      |      | 1141 |      |
| 2-28   |               |                 |                    |             |                |                |                  |                |             |             |              |                |             |         |      |      |      |      | 1356 |      |
| 2-34   | TGAGACGGGAGAT | CACCCCCACCGTCAT | CACAGCAAGACCGTAGAT | TGGAGATCAGG | GACACCGGCCACCA | CGGCCACCATGGCC | ACCAGAACACCATCAT | CATCAGCATGACCA | CAGAGAAGGCC | ACCAAGATCAT | SACAGACCGATG | TTTGGGATGAGGCC | CTCCCGGTTCA | ACCCCTT |      |      |      |      |      | 1494 |
| 2-35   |               |                 |                    |             |                |                |                  |                |             |             |              |                |             |         |      |      |      |      | 1141 |      |
| 2-36   | TGAGACGGGAGAT | CACCCCCACCGTCAT | CACAGCAAGACCGTAGAT | TGGAGATCAGG | GACACCGGCCACCA | CGGCCACCATGGCC | ACCAGAACACCATCAT | CATCAGCATGACCA | CAGAGAAGGCC | ACCAAGATCAT | SACAGACCGATG | TTTGGGATGAGGCC | CTCCCGGTTCA | ACCCCTT |      |      |      |      |      | 1494 |
| 2-37   |               |                 |                    |             |                |                |                  |                |             |             |              |                |             |         |      |      |      |      | 1141 |      |
| 2-38   |               |                 |                    |             |                |                |                  |                |             |             |              |                |             |         |      |      |      |      | 1356 |      |
| 2-47   |               |                 |                    |             |                |                |                  |                |             |             |              |                |             |         |      |      |      |      | 1141 |      |
| 2-50   |               |                 |                    |             |                |                |                  |                |             |             |              |                |             |         |      |      |      |      | 1051 |      |
| 2-52   |               |                 |                    |             |                |                |                  |                |             |             |              |                |             |         |      |      |      |      | 1358 |      |
| 2-55   |               |                 |                    |             |                |                |                  |                |             |             |              |                |             |         |      |      |      |      | 1196 |      |
| 2-56   |               |                 |                    |             |                |                |                  |                |             |             |              |                |             |         |      |      |      |      | 1355 |      |
| 2-57   |               |                 |                    |             |                |                |                  |                |             |             |              |                |             |         |      |      |      |      | 1357 |      |
| 2-59   |               |                 |                    |             |                |                |                  |                |             |             |              |                |             |         |      |      |      |      | 1054 |      |
| 2-61   |               |                 |                    |             |                |                |                  |                |             |             |              |                |             |         |      |      |      |      | 1221 |      |
| 2-63   |               |                 |                    |             |                |                |                  |                |             |             |              |                |             |         |      |      |      |      | 1143 |      |
| 2-64   |               |                 |                    |             |                |                |                  |                |             |             |              |                |             |         |      |      |      |      | 1356 |      |
| 2-65   |               |                 |                    |             |                |                |                  |                |             |             |              |                |             |         |      |      |      |      | 1054 |      |
| 2-66   |               |                 |                    |             |                |                |                  |                |             |             |              |                |             |         |      |      |      |      | 1248 |      |
| 2-67   |               |                 |                    |             |                |                |                  |                |             |             |              |                |             |         |      |      |      |      | 1141 |      |
| 2-73   |               |                 |                    |             |                |                |                  |                |             |             |              |                |             |         |      |      |      |      | 1141 |      |
| 2-76   |               |                 |                    |             |                |                |                  |                |             |             |              |                |             |         |      |      |      |      | 1357 |      |
| 2-77   |               |                 |                    |             |                |                |                  |                |             |             |              |                |             |         |      |      |      |      | 1356 |      |
| 2-79   |               |                 |                    |             |                |                |                  |                |             |             |              |                |             |         |      |      |      |      | 1356 |      |
| 2-82   |               |                 |                    |             |                |                |                  |                |             |             |              |                |             |         |      |      |      |      | 1357 |      |
| 2-84   |               |                 |                    |             |                |                |                  |                |             |             |              |                |             |         |      |      |      |      | 1054 |      |
| 2-90   |               |                 |                    |             |                |                |                  |                |             |             |              |                |             |         |      |      |      |      | 1143 |      |
| 2-91   |               |                 |                    |             |                |                |                  |                |             |             |              |                |             |         |      |      |      |      | 1143 |      |
| 2-95   |               |                 |                    |             |                |                |                  |                |             |             |              |                |             |         |      |      |      |      | 1144 |      |
| 2-102  |               |                 |                    |             |                |                |                  |                |             |             |              |                |             |         |      |      |      |      | 1356 |      |
| 2-103  |               |                 |                    |             |                |                |                  |                |             |             |              |                |             |         |      |      |      |      | 1188 |      |
| 2-105  |               |                 |                    |             |                |                |                  |                |             |             |              |                |             |         |      |      |      |      | 1143 |      |
| 2-106  |               |                 |                    |             |                |                |                  |                |             |             |              |                |             |         |      |      |      |      | 1357 |      |
| 2-107  |               |                 |                    |             |                |                |                  |                |             |             |              |                |             |         |      |      |      |      | 1142 |      |
| 2-109  |               |                 |                    |             |                |                |                  |                |             |             |              |                |             |         |      |      |      |      | 1359 |      |
| 2-111  |               |                 |                    |             |                |                |                  |                |             |             |              |                |             |         |      |      |      |      | 1356 |      |
| 2-115  |               |                 |                    |             |                |                |                  |                |             |             |              |                |             |         |      |      |      |      | 1357 |      |
| 2-116  |               |                 |                    |             |                |                |                  |                |             |             |              |                |             |         |      |      |      |      | 1054 |      |
| 2-118  |               |                 |                    |             |                |                |                  |                |             |             |              |                |             |         |      |      |      |      | 1141 |      |
| 2-119  |               |                 |                    |             |                |                |                  |                |             |             |              |                |             |         |      |      |      |      | 1141 |      |
| 4-1501 |               |                 |                    |             |                |                |                  |                |             |             |              |                |             |         |      |      |      |      | 1355 |      |
| 4-1503 |               |                 |                    |             |                |                |                  |                |             |             |              |                |             |         |      |      |      |      | 1050 |      |
| 4-1508 |               |                 |                    |             |                |                |                  |                |             |             |              |                |             |         |      |      |      |      | 1050 |      |
| 4-1511 |               |                 |                    |             |                |                |                  |                |             |             |              |                |             |         |      |      |      |      | 1298 |      |
| 4-1515 |               |                 |                    |             |                |                |                  |                |             |             |              |                |             |         |      |      |      |      | 1355 |      |
| 4-1516 |               |                 |                    |             |                |                |                  |                |             |             |              |                |             |         |      |      |      |      | 1289 |      |
| 4-1517 |               |                 |                    |             |                |                |                  |                |             |             |              |                |             |         |      |      |      |      | 1050 |      |
| 4-1520 |               |                 |                    |             |                |                |                  |                |             |             |              |                |             |         |      |      |      |      | 1141 |      |
| 4-1521 |               |                 |                    |             |                |                |                  |                |             |             |              |                |             |         |      |      |      |      | 1206 |      |
| 4-1523 |               |                 |                    |             |                |                |                  |                |             |             |              |                |             |         |      |      |      |      | 1358 |      |
| 4-1528 |               |                 |                    |             |                |                |                  |                |             |             |              |                |             |         |      |      |      |      | 1222 |      |
| 4-1530 |               |                 |                    |             |                |                |                  |                |             |             |              |                |             |         |      |      |      |      | 1359 |      |
| 4-1531 |               |                 |                    |             |                |                |                  |                |             |             |              |                |             |         |      |      |      |      | 1141 |      |
| 4-1532 |               |                 |                    |             |                |                |                  |                |             |             |              |                |             |         |      |      |      |      | 1142 |      |
| 4-1533 |               |                 |                    |             |                |                |                  |                |             |             |              |                |             |         |      |      |      |      | 1141 |      |
| 4-1534 |               |                 |                    |             |                |                |                  |                |             |             |              |                |             |         |      |      |      |      | 1206 |      |
| 4-1535 |               |                 |                    |             |                |                |                  |                |             |             |              |                |             |         |      |      |      |      | 1050 |      |
| 4-1536 |               |                 |                    |             |                |                |                  |                |             |             |              |                |             |         |      |      |      |      | 1118 |      |
| 4-1538 |               |                 |                    |             |                |                |                  |                |             |             |              |                |             |         |      |      |      |      | 1359 |      |
| 4-1542 |               |                 |                    |             |                |                |                  |                |             |             |              |                |             |         |      |      |      |      | 1141 |      |
| 4-1543 |               |                 |                    |             |                |                |                  |                |             |             |              |                |             |         |      |      |      |      | 1358 |      |
| 4-1544 |               |                 |                    |             |                |                |                  |                |             |             |              |                |             |         |      |      |      |      | 1289 |      |

...Repeat 3.3

Repeat 5.2

Repeat 4.3...

...Ex23...

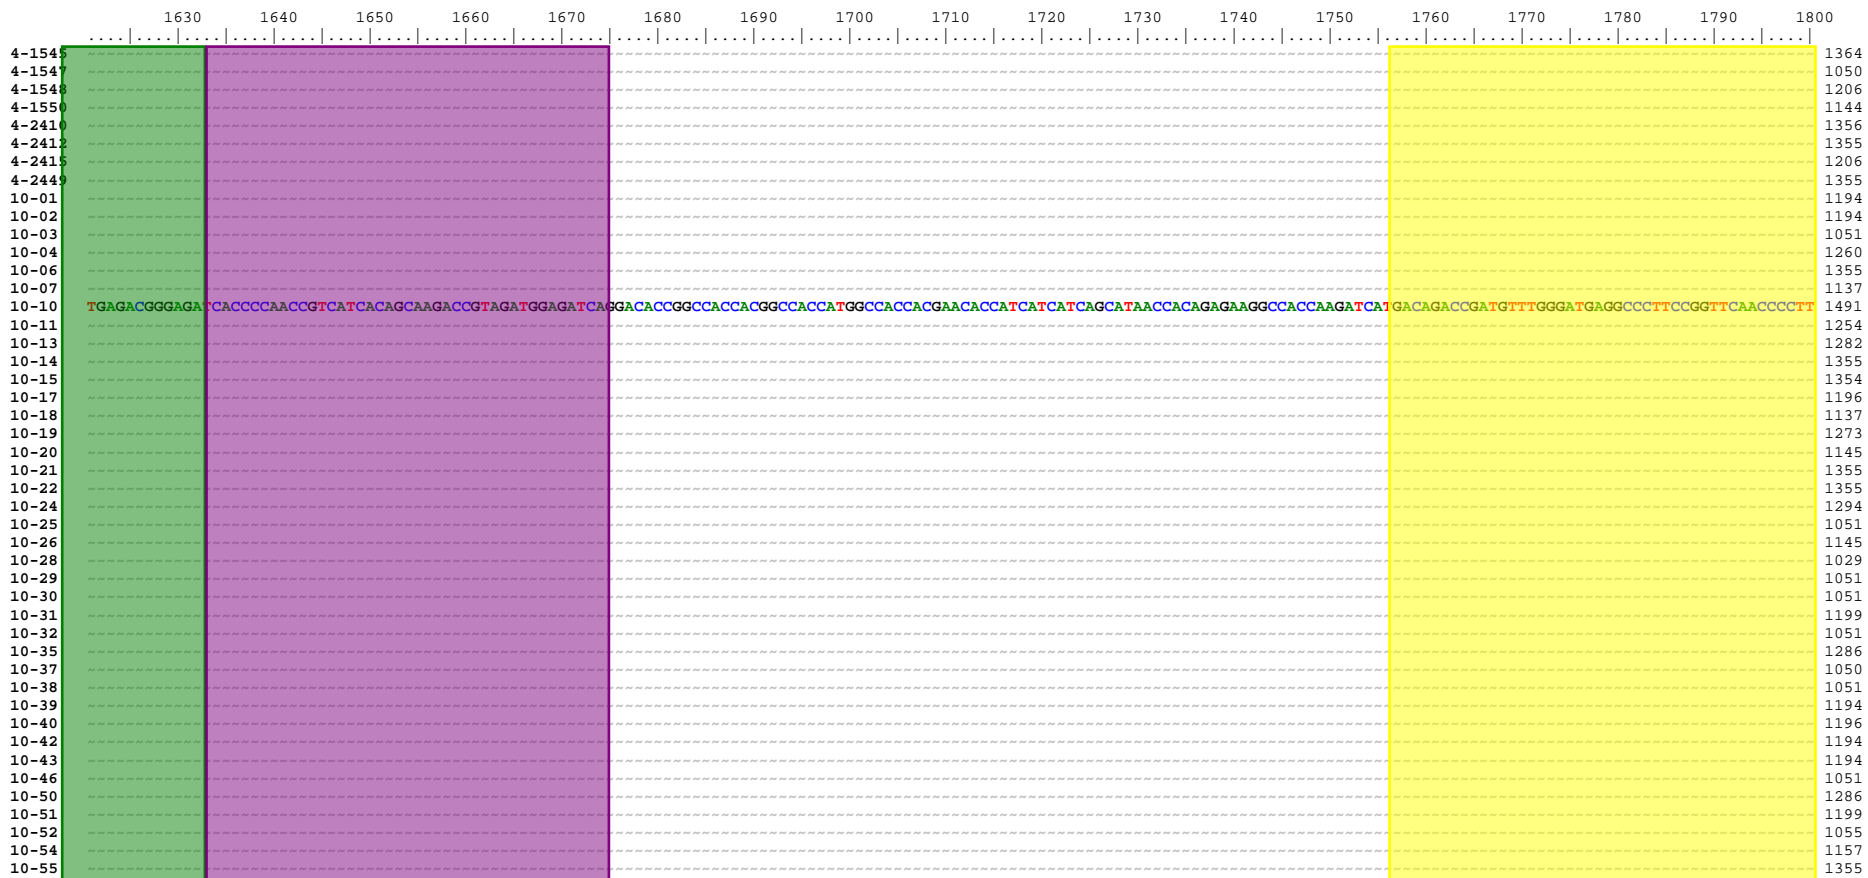

...Repeat 3.3

Repeat 5.2

Repeat 4.3...



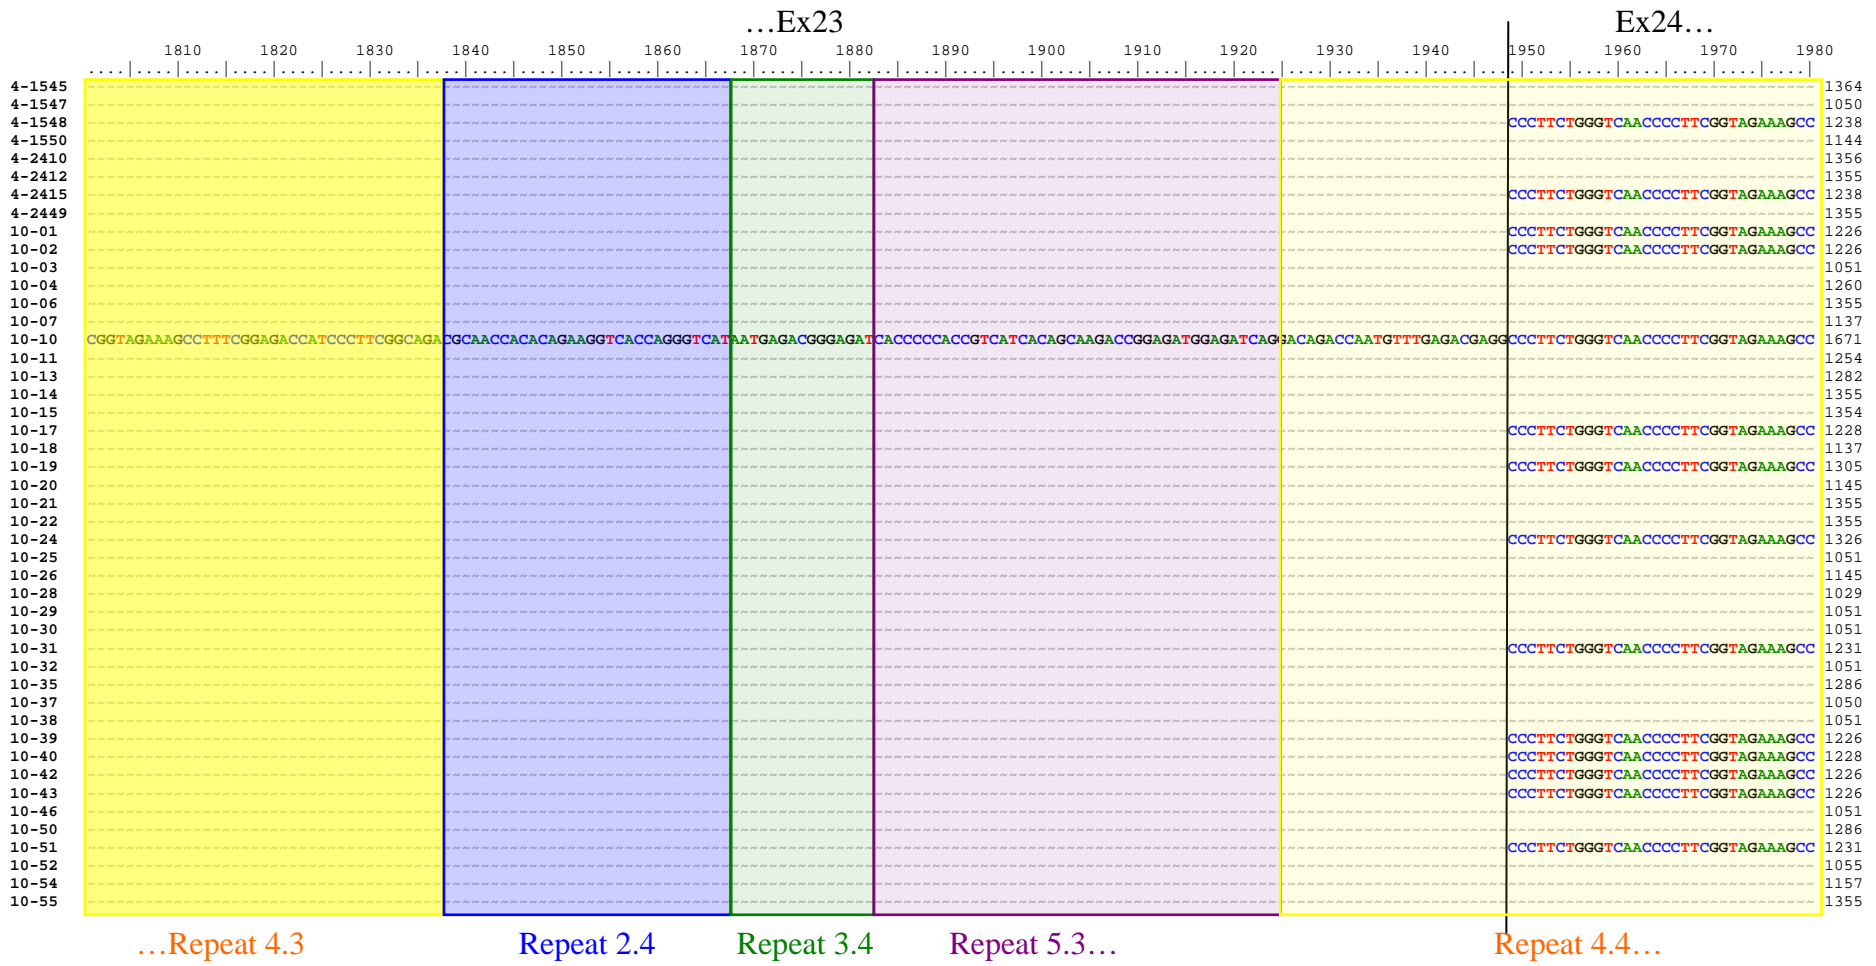

| Coordinate | Sequence                                                                                                                                                                    | Coordinate |
|------------|-----------------------------------------------------------------------------------------------------------------------------------------------------------------------------|------------|
| 4-1545     |                                                                                                                                                                             | 1364       |
| 4-1547     |                                                                                                                                                                             | 1050       |
| 4-1548     |                                                                                                                                                                             | 1238       |
| 4-1550     |                                                                                                                                                                             | 1144       |
| 4-2410     |                                                                                                                                                                             | 1356       |
| 4-2412     |                                                                                                                                                                             | 1355       |
| 4-2415     |                                                                                                                                                                             | 1238       |
| 4-2449     |                                                                                                                                                                             | 1355       |
| 10-01      |                                                                                                                                                                             | 1226       |
| 10-02      |                                                                                                                                                                             | 1226       |
| 10-03      |                                                                                                                                                                             | 1051       |
| 10-04      |                                                                                                                                                                             | 1260       |
| 10-06      |                                                                                                                                                                             | 1355       |
| 10-07      |                                                                                                                                                                             | 1137       |
| 10-10      | CGGTAGAAAGCCTTTCGGAGACCATCCCTTCGGCAGACGCAACCACACAGAAGGTCACCAGGTCATAATGAGACGGGAGATCACCCCAACCGTCATCACAGCAAGACCGGAGATGGAGATCAGSACAGACCAATGTTTGAGACGAGGCCCTTCTGGGTCAACCCCTTCGGT | 1671       |
| 10-11      |                                                                                                                                                                             | 1254       |
| 10-13      |                                                                                                                                                                             | 1282       |
| 10-14      |                                                                                                                                                                             | 1355       |
| 10-15      |                                                                                                                                                                             | 1354       |
| 10-17      |                                                                                                                                                                             | 1228       |
| 10-18      |                                                                                                                                                                             | 1137       |
| 10-19      |                                                                                                                                                                             | 1305       |
| 10-20      |                                                                                                                                                                             | 1145       |
| 10-21      |                                                                                                                                                                             | 1355       |
| 10-22      |                                                                                                                                                                             | 1355       |
| 10-24      |                                                                                                                                                                             | 1326       |
| 10-25      |                                                                                                                                                                             | 1051       |
| 10-26      |                                                                                                                                                                             | 1145       |
| 10-28      |                                                                                                                                                                             | 1029       |
| 10-29      |                                                                                                                                                                             | 1051       |
| 10-30      |                                                                                                                                                                             | 1051       |
| 10-31      |                                                                                                                                                                             | 1231       |
| 10-32      |                                                                                                                                                                             | 1051       |
| 10-35      |                                                                                                                                                                             | 1286       |
| 10-37      |                                                                                                                                                                             | 1050       |
| 10-38      |                                                                                                                                                                             | 1051       |
| 10-39      |                                                                                                                                                                             | 1226       |
| 10-40      |                                                                                                                                                                             | 1228       |
| 10-42      |                                                                                                                                                                             | 1226       |
| 10-43      |                                                                                                                                                                             | 1226       |
| 10-46      |                                                                                                                                                                             | 1051       |
| 10-50      |                                                                                                                                                                             | 1286       |
| 10-51      |                                                                                                                                                                             | 1231       |
| 10-52      |                                                                                                                                                                             | 1055       |
| 10-54      |                                                                                                                                                                             | 1157       |
| 10-55      |                                                                                                                                                                             | 1355       |







...Ex25b

2170 2180 2190 2000

2-05 AATCAATGAAGAAGACATCAATGTGGTCGCCGAGGTGAAG 1544  
2-06 AGTCAATGAAGAAGACGTCAATGTGGTCGCCGAGGTGTAA 1440  
2-07 AATCAATGAAGAAGACATCAATGTGGTCGCCGAGGTGTAG 1542  
2-08 AATCAATGAAGAAGACATCAATGTGGTCGCCGAGGTGTAG 1542  
2-09 AGTCAATGAAGAAGACGTCAATGTGGTCGCCGAGGTGTAG 1440  
2-11 AGTCAATGAAGAAGACATCAATGTGGTCGCCGAGGTGTAG 1333  
2-12 GATC-----AATGATGTCGCCGAGGTGTAG 1318  
2-15 AATCAATGAAGTAGACACCAATGTGGTCGCCGAGGTGTAG 1335  
2-17 AGTCAATGAAGAAGACATCAATGTGGTCGCCGAGGTGTAG 1338  
2-18 AATCAATGAAGAAGACATCAATGTGGTCGCCGAGGTGTAA 1543  
2-20 GATC-----AATGATGTCGCCGAGGTGTAG 1318  
2-21 AATCAATGAAGAAGACATCAATGTGGTCGCCGAGGTGTAG 1542  
2-24 AATCAATGAAGAAGACATCAATGTGGTCGCCGAGGTGTAA 1544  
2-25 GATC-----AATGATGTCGCCGAGGTGTAG 1318  
2-28 AATCAATGAAGAAGACATCAATGTGGTCGCCGAGGTGTAG 1542  
2-34 AATCAATGAAGTAGACACCAATGTGGTCGCCGAGGTGTAG 1894  
2-35 AGTCAATGAAGAAGACATCAATGTGGTCGCCGAGGTGTAG 1333  
2-36 AATCAATGAAGTAGACACCAATGTGGTCGCCGAGGTGTAG 1894  
2-37 AGTCAATGAAGAAGACATCAATGTGGTCGCCGAGGTGTAG 1333  
2-38 AATCAATGAAGAAGACATCAATGTGGTCGCCGAGGTGTAG 1542  
2-47 AGTCAATGAAGAAGACATCAATGTGGTCGCCGAGGTGTAG 1333  
2-50 GATC-----AATGATGTCGCCGAGGTGTAG 1228  
2-52 AATCAATGAAGAAGACATCAATGTGGTCGCCGAGGTGTAG 1544  
2-55 GATC-----AATGATGTCGCCGAGGTGTAG 1433  
2-56 AATCAATGAAGAAGACATCAATGTGGTCGCCGAGGTGTAG 1541  
2-57 AATCAATGAAGAAGACATCAATGTGGTCGCCGAGGTGTAG 1543  
2-59 GATC-----AATGATGTCGCCGAGGTGTAG 1231  
2-61 GATC-----AATGATGTCGCCGAGGTGTAG 1398  
2-63 AGTCAATGAAGAAGACATCAATGGGGTCGCCGAGGTGTAG 1335  
2-64 AATCAATGAAGAAGACATCAATGTGGTCGCCGAGGTGTAG 1542  
2-65 GATCAATGAAGTAGACACCAATGGGGTCGCCGAGGTGTAG 1246  
2-66 AATCAATGAAGAAGACATCAATGTGGTCGCCGAGGTGTAG 1434  
2-67 AGTCAATGAAGAAGACATCAATGTGGTCGCCGAGGTGTAG 1333  
2-73 AATCAATGAAGAAGACATCAATGTGGTCGCCGAGGTGTAG 1327  
2-76 AATCAATGAAGAAGACATCAATGTGGTCGCCGAGGTGTAG 1543  
2-77 AATCAATGAAGAAGACATCAATGTGGTCGCCGAGGTGTAG 1542  
2-79 AATCAATGAAGAAGACATCAATGTGGTCGCCGAGGTGTAG 1542  
2-82 AATCAATGAAGAAGACATCAATGTGGTCGCCGAGGAGTAG 1543  
2-84 GATC-----AATGATGTCGCCGAGGTGTAG 1231  
2-90 AGTCAATGAAGAAGACATCAATGGGGTCGCCGAGGTGTAT 1335  
2-91 TGCAAT-----GACTACGACGTGGTCGCCGAGTCGATAT 1329  
2-95 GATC-----AATGATGTCGCCGAGGTGTAG 1321  
2-102 AATCAATGAAGAAGACATCAATGTGGTCGCCGAGGTGTAG 1542  
2-103 AGTCAATGAAGAAGACGTCAATGTGGTCGCCGAGGTGTAG 1440  
2-105 AGTCAATGAAGAAGACATCAATGGGGTCGCCGAGGTGTAG 1335  
2-106 AATCAATGAAGAAGACATCAATGTGGTCGCCGAGGTGTAG 1543  
2-107 AGTCAATGAAGAAGACATCAATGTGGTCGCCGAGGTGTAG 1334  
2-109 AATCAATGAAGAACACATCAATGTGGTCGCCGAGGTGTAG 1545  
2-111 AATCAATGAAGAAGACATCAATGTGGTCGCCGAGGAGTAG 1542  
2-115 AATCAATGAAGAAGACATCAATGTGGTCGCCGAGGTGTAG 1543  
2-116 GATC-----AATGATGTCGCCGAGGTGTAG 1231  
2-118 GATC-----AATGATGTCGCCGAGGTGTAG 1318  
2-119 GATC-----AATGATGTCGCCGAGGTGTAG 1318  
4-1501 AATCAATGAAGAAGACATCAATGTGGTCGCCGAGGTGTAG 1541  
4-1503 GATC-----AATGATGTCGCCGAGGTGTAG 1227  
4-1508 GATC-----AATGATGTCGCCGAGGTGTAG 1227  
4-1511 AATCAATGAAGTAGACACCAATGTGGTCGCCGAGGTGTAG 1550  
4-1515 AGTCAATGAAGAAGACATCAATGTGGTCGCCGAGGTGTAG 1547  
4-1516 ATTCAATGAAGAAGACGTCAATGTGGTCGCCGAGGTGTAG 1481  
4-1517 GATC-----AATGATGTCGCCGAGGTGTAG 1227  
4-1520 AGTCAATGAAGAAGACATCAATGATGTCGCCGAGGTGTAG 1333  
4-1521 AGTCAATGAAGAAGACGTCAATGTGGTCGCCGAGGTGTAG 1458  
4-1523 AGTCAATGAAGAAGACGTCAATGTGGTCGCCGAGGTGTAG 1550  
4-1528 AGTCAATGAAGAAGACATCAATGATGTCGCCGAGGTGTAG 1414  
4-1530 AATCAATGAAGAAGACATCAATGTGGTCGCTGAGGTGTAG 1545  
4-1531 AGTCAATGAAGAAGACATCAATGATGTCGCCGAGGTGTAG 1333  
4-1532 AGTCAATGAAGAAGACATCAATGATGTCGCCGAGGTGTAG 1334  
4-1533 AGTCAATGAAGAAGACATCAATGATGTCGCTGAGGTGTAG 1333  
4-1534 AGTCAATGAAGAAGACGTCAATATGGTCGCCGAGGTGTAG 1458  
4-1535 GATC-----AATGAGGTCGCCGAGGTGTAG 1227  
4-1536 AGTCAATGAAGAAGACGTCAATGTGGTCGCCGAGGTGTAG 1310  
4-1538 AGTCAATGAAGAAGACGTCAATGTGGTCGCTGAGGTGTAG 1551  
4-1542 AGTCAATGAAGAAGACATCAATGATGTCGCTGAGGTGTAG 1333  
4-1543 AATCAATGAAGAAGACATCAATGTGGTCGCCGAGGTGTAG 1544  
4-1544 AGTCAATGAAGAAGACGTCAATGTGGTCGCCGAGGTGTAG 1481

...Ex25b

2170 2180 2190 2200

4-1545 AGTCAATGAAGAAGACGTC AATGTGGTCGCCGAGGTCTAG 1556
4-1547 GATC-----AATGATGTCGCCGAGGTCTAG 1227
4-1548 AGTCAATGAAGAAGACGTC AATGTGGTCGCCGAGGTCTAG 1458
4-1550 AGTCAATGAAGAAGACATCA AATGTGGTCGCCGAGGTCTAG 1336
4-2410 AATCAATGAAGAAGACATCA AATGTGGTCGCCGAGGTCTAG 1542
4-2412 AATCAATGAAGAAGACATCA AATGTGGTCGCCGAGGTCTAG 1541
4-2415 AGTCAATGAAGAAGACGTC AATGTGGTCGCCGAGGTCTAG 1458
4-2449 AATCAATGAAGAAGACATCA AATGTGGTCGCCGAGGTCTAG 1541
10-01 AGTCAATGAAGAAGACGTC AATGTGGTCGCCGAGGTCTAG 1446
10-02 AGTCAATGAAGAAGACGTC AATGTGGTCGCCGAGGTCTAG 1446
10-03 GATC-----AATGATGTCGCCGAGGTCTAG 1228
10-04 AATCAATGAAGAAGACATCA AATGTGGTCGCCGAGGTCTAG 1446
10-06 AATCAATGAAGAAGACATCA AATGTGGTCGCCGAGGTCTAG 1541
10-07 ATTCAATGAAGAAGACGTC C AATGTGGTCGCCGAGGTCTAG 1329
10-10 AATCAATGAAGTAGACACCA AATGTGGTCGCCGAGGTCTAG 1891
10-11 AATCAATGAAGAAGACATCA AATGTGGTCGCCGAGGTCTAG 1440
10-13 AGTCAATGAAGAAGACGTC AATGTGGTCGCCGAGGTCTAG 1474
10-14 AATCAATGAAGAAGACATCA AATGTGGTCGCCGAGGTCTAG 1541
10-15 AATCAATGAAGAAGACATCA AATGTGGTCGCCGAGGTCTAG 1540
10-17 AGTCAATGAAGAAGACGTC AATGTGGTCGCCGAGGTCTAG 1448
10-18 ATTCAATGAAGAAGACGTC C AATGTGGTCGCCGAGGTCTAG 1329
10-19 AATCAATGAAGAAGACATCA AATGTGGTCGCCGAGGTCTAG 1519
10-20 AGTCAATGAAGAAGACATCA AATGGGGTCGCCGAGGTCTAG 1337
10-21 AATCAATGAAGAAGACATCA AATGTGGTCGCCGAGGTCTAG 1541
10-22 AATCAATGAAGAAGACATCA AATGTGGTCGCCGAGGTCTAG 1541
10-24 AGTCAATGAAGAAGACGTC AATGTGGTCGCCGAGGTCTAG 1546
10-25 GATC-----AATGATGTCGCCGAGGTCTAG 1228
10-26 AGTCAATGAAGAAGACATCA AATGGGGTCGCCGAGGTCTAG 1337
10-28 GATC-----AATGATGTCGCCGAGGTCTAG 1206
10-29 GATC-----AATGATGTCGCCGAGGTCTAG 1228
10-30 GATC-----AATGATGTCGCCGAGGTCTAG 1228
10-31 AGTCAATGAAGAAGACGTC AATGTGGTCGCCGAGGTCTAG 1451
10-32 GATC-----AATGATGTCGCCGAGGTCTAG 1228
10-35 ATTCAATGAAGAAGACGTC AATGTGGTCGCCGAGGTCTAG 1478
10-37 GATC-----AATGATGTCGCCGAGGTCTAG 1227
10-38 GATC-----AATGATGTCGCCGAGGTCTAG 1228
10-39 AGTCAATGAAGAAGACGTC AATGTGGTCGCCGAGGTCTAG 1446
10-40 GATC-----AATGATGTCGCCGAGGTCTAG 1433
10-42 AGTCAATGAAGAAGACGTC AATGTGGTCGCCGAGGTCTTA 1446
10-43 AGTCAATGAAGAAGACGTC AATGTGGTCGCCGAGGTCTTA 1446
10-46 GATC-----AATGATGTCGCCGAGGTCTAG 1228
10-50 ATTCAATGAAGAAGACGTC AATGTGGTCGCCGAGGTCTAG 1478
10-51 AGTCAATGAAGAAGACGTC AATGTGGTCGCCGAGGTCTAG 1451
10-52 GATC-----AATGATGTCGCCGAGGTCTAG 1232
10-54 ATTCAATGAAGAAGACGTC AATGTGGTCGCCGAGGTCTAG 1349
10-55 AGTCAATGAAGAAGACGTC AATGTGGTCGCCGAGGTCTAG 1547
