# Supplementary material for: Extraordinary diversity among members of the large gene family, 185/333, from the purple sea urchin, Strongylocentrotus purpuratus
Source: PubMed Central journal article supplement (PMC1988830; doi:10.1186/1471-2199-8-68), 2007-08-15
Supplement: 1471-2199-8-68-S3.pdf [file 1471-2199-8-68-S3.pdf]

**Additional File 3: Alignment of the encoded amino acid sequences.** Vertical black lines indicate the element edges. Elements are labeled above the sequence. Repeats are indicated by colored boxes, which each different color (shades of red = type 1; blue = type 2; green = type 3; yellow = type 4; and purple = type 5).







|        | Ex7    | Ex8  | Ex10           | Ex11        | Ex12 | Ex13 | Ex14 | Ex15 | Ex16 | Ex17 | Ex18 | Ex19 | Ex20 |
|--------|--------|------|----------------|-------------|------|------|------|------|------|------|------|------|------|
| 4-1545 | DGLGGS | DRFD | RRGHG          |             |      |      |      |      |      |      |      |      |      |
| 4-1547 | DGLGGP | QFD  | PGRRHHG        |             |      |      |      |      |      |      |      |      |      |
| 4-1548 | DGLGGR | QFD  |                |             |      |      |      |      |      |      |      |      |      |
| 4-1550 | DGLGGR | QFD  |                |             |      |      |      |      |      |      |      |      |      |
| 4-2410 | DGLGGP | QFD  | PGRRHHG        |             |      |      |      |      |      |      |      |      |      |
| 4-2412 | DGLGGP | QFD  | PGRRHHG        |             |      |      |      |      |      |      |      |      |      |
| 4-2415 | DGLGGP | QFD  |                |             |      |      |      |      |      |      |      |      |      |
| 4-2419 | DGLGGP | QFD  | PGRRHHG        |             |      |      |      |      |      |      |      |      |      |
| 10-01  | DGLGGR | QFD  |                |             |      |      |      |      |      |      |      |      |      |
| 10-02  | DGLGGR | QFD  |                |             |      |      |      |      |      |      |      |      |      |
| 10-03  | DGLGGP | QFD  | PGRRHHG        |             |      |      |      |      |      |      |      |      |      |
| 10-04  | DGLGGP | QFD  | PGRRHHG        |             |      |      |      |      |      |      |      |      |      |
| 10-06  | DGLGGP | QFD  | PGRRHHG        |             |      |      |      |      |      |      |      |      |      |
| 10-07  | DGLGGP | QFD  |                |             |      |      |      |      |      |      |      |      |      |
| 10-10  | DGLGGP | QFD  | PGHGHYGHQAGRPF | FGNPPFPNPEQ |      |      |      |      |      |      |      |      |      |
| 10-11  | DGLGGR | QFD  |                |             |      |      |      |      |      |      |      |      |      |
| 10-13  | DGLGGP | QFD  | PGHGHYGHQAGRPF | FGNPPFPNPEQ |      |      |      |      |      |      |      |      |      |
| 10-14  | DGLGGP | QFD  | PGRRHHG        |             |      |      |      |      |      |      |      |      |      |
| 10-15  | DGLGGP | QFD  | PGRRHHG        |             |      |      |      |      |      |      |      |      |      |
| 10-17  | DGLGGR | QFD  |                |             |      |      |      |      |      |      |      |      |      |
| 10-18  | DGLGGP | QFD  |                |             |      |      |      |      |      |      |      |      |      |
| 10-19  | DGLGGP | QFD  |                |             |      |      |      |      |      |      |      |      |      |
| 10-20  | DGLGGR | QFD  |                |             |      |      |      |      |      |      |      |      |      |
| 10-21  | DGLGGP | QFD  | PGRRHHG        |             |      |      |      |      |      |      |      |      |      |
| 10-22  | DGLGGP | QFD  | PGRRHHG        |             |      |      |      |      |      |      |      |      |      |
| 10-24  | DGLGGP | QFD  | PGRRHHG        |             |      |      |      |      |      |      |      |      |      |
| 10-25  | DGLGGP | QFD  | PGRRHHG        |             |      |      |      |      |      |      |      |      |      |
| 10-26  | DGLGGR | QFD  |                |             |      |      |      |      |      |      |      |      |      |
| 10-28  | DGLGGP | QFD  | PGRRHHG        |             |      |      |      |      |      |      |      |      |      |
| 10-29  | DGLGGP | QFD  | PGRRHHG        |             |      |      |      |      |      |      |      |      |      |
| 10-30  | DGLGGP | QFD  | PGRRHHG        |             |      |      |      |      |      |      |      |      |      |
| 10-31  | DGLGGR | QFD  |                |             |      |      |      |      |      |      |      |      |      |
| 10-32  | DGLGGP | QFD  | PGRRHHG        |             |      |      |      |      |      |      |      |      |      |
| 10-35  | DGLGGS | DRFD | LRRGHG         |             |      |      |      |      |      |      |      |      |      |
| 10-37  | DGLGGP | QFD  | PGRRHHG        |             |      |      |      |      |      |      |      |      |      |
| 10-38  | DGLGGP | QFD  | PGRRHHG        |             |      |      |      |      |      |      |      |      |      |
| 10-39  | DGLGGR | QFD  |                |             |      |      |      |      |      |      |      |      |      |
| 10-40  | DGLGGR | QFD  |                |             |      |      |      |      |      |      |      |      |      |
| 10-42  | DGLGGR | QFD  |                |             |      |      |      |      |      |      |      |      |      |
| 10-43  | DGLGGR | QFD  |                |             |      |      |      |      |      |      |      |      |      |
| 10-46  | DGLGGP | QFD  | PGRRHHG        |             |      |      |      |      |      |      |      |      |      |
| 10-50  | DGLGGS | DRFD | LRRGHG         |             |      |      |      |      |      |      |      |      |      |
| 10-51  | DGLGGR | QFD  |                |             |      |      |      |      |      |      |      |      |      |
| 10-52  | DGLGGP | QFD  | PGRRHHG        |             |      |      |      |      |      |      |      |      |      |
| 10-54  | DGLGGS | DRFD | LRRGHG         |             |      |      |      |      |      |      |      |      |      |
| 10-55  | DGLGGP | QFD  | PGRRHHG        |             |      |      |      |      |      |      |      |      |      |

Repeat 2.1      Repeat 4.1      Repeat 3.2      Repeat 4.2...

Repeat 3.1      Repeat 2.2      Repeat 5.1

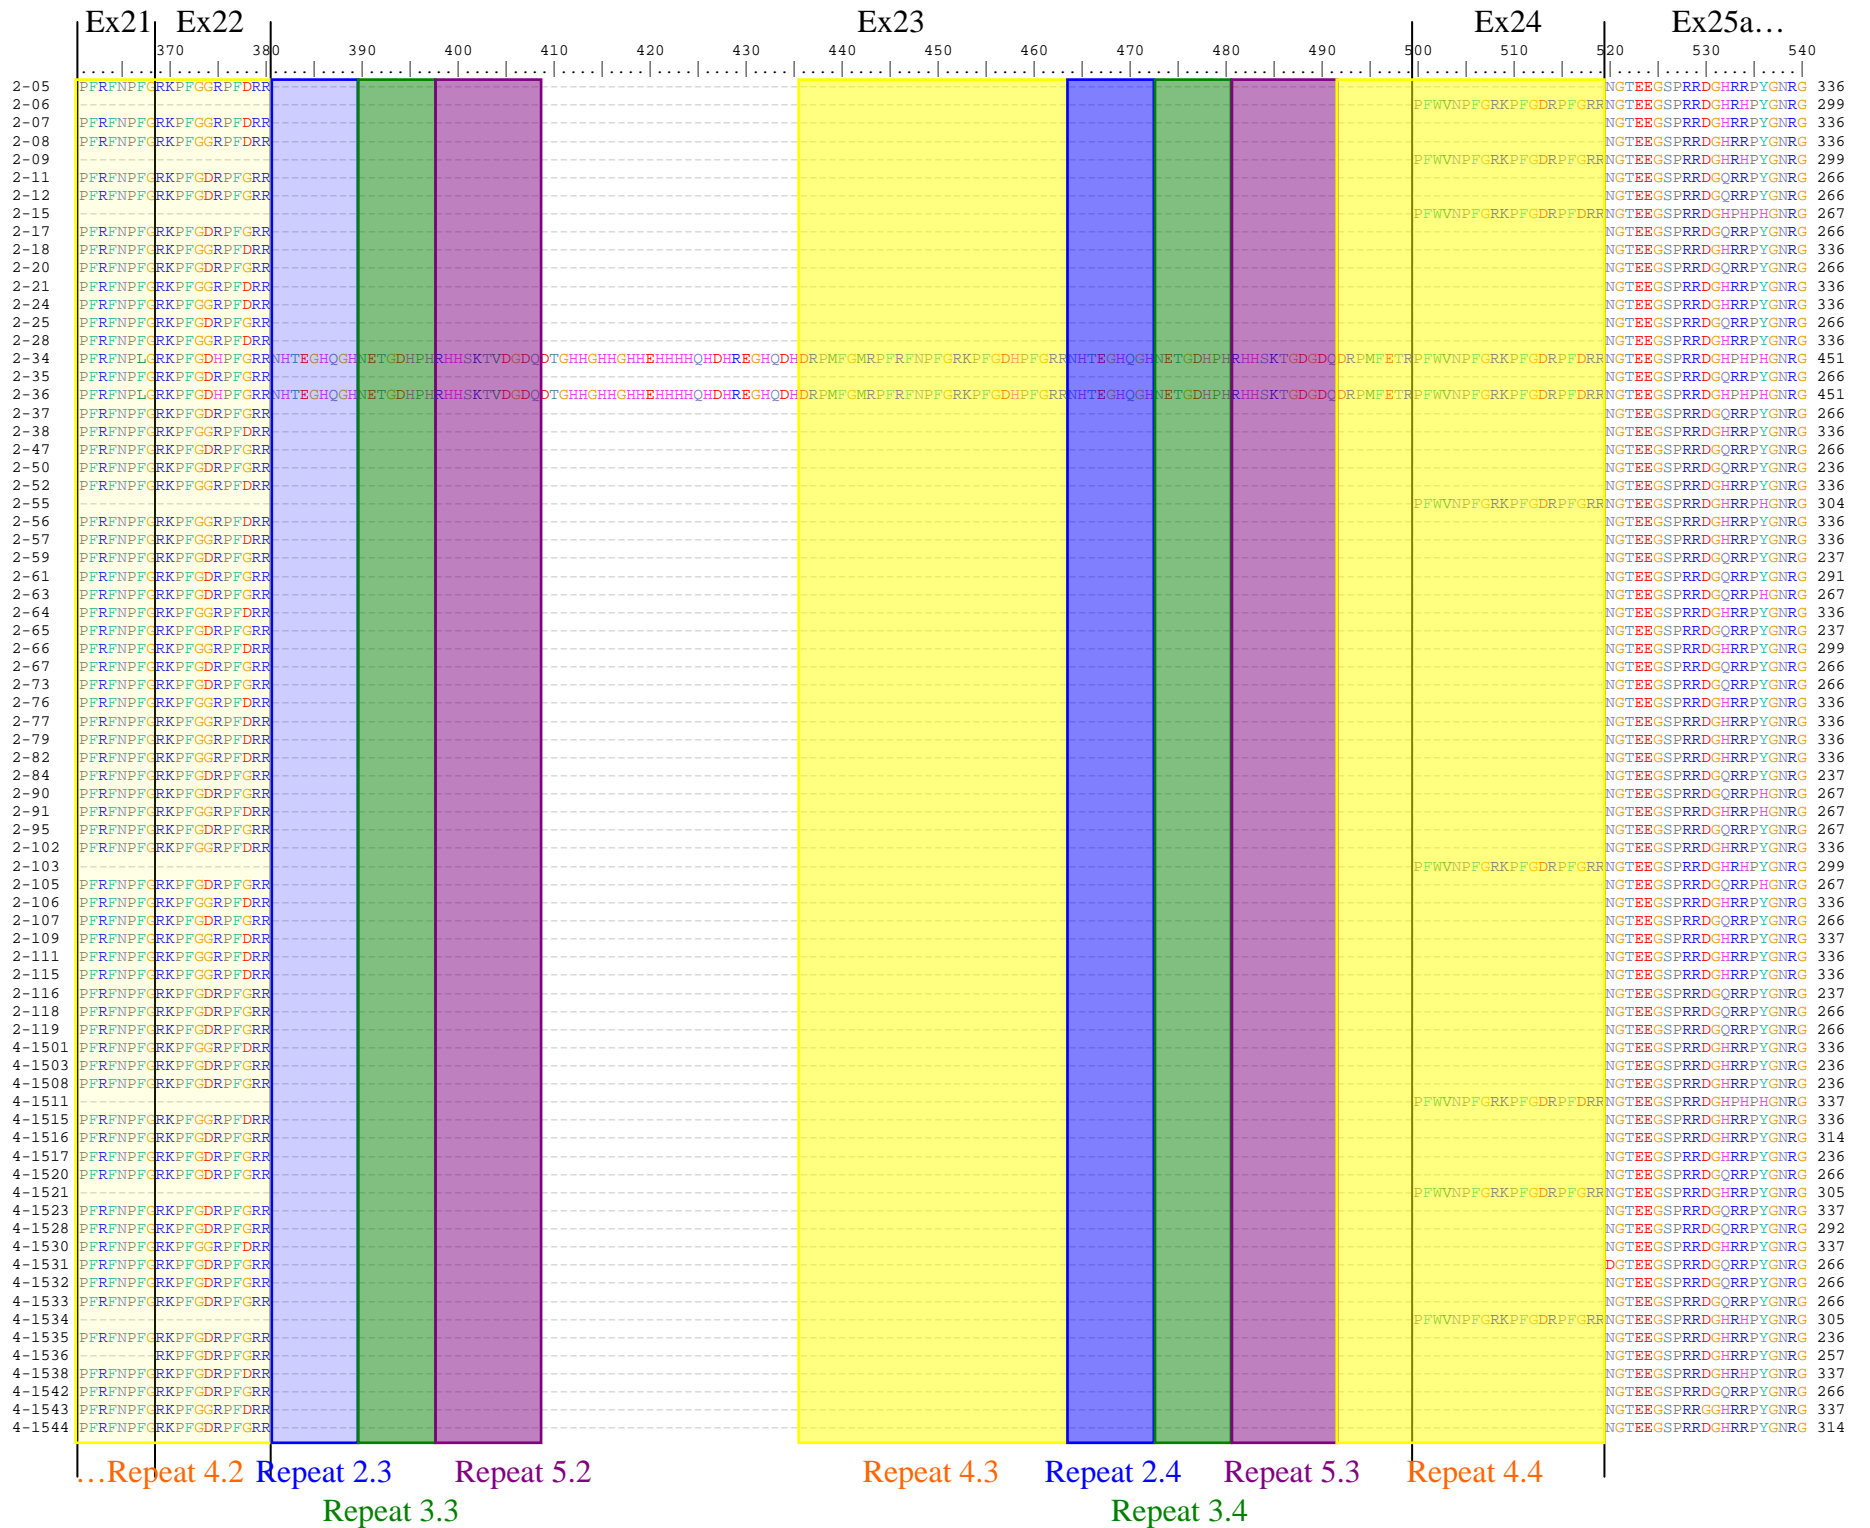

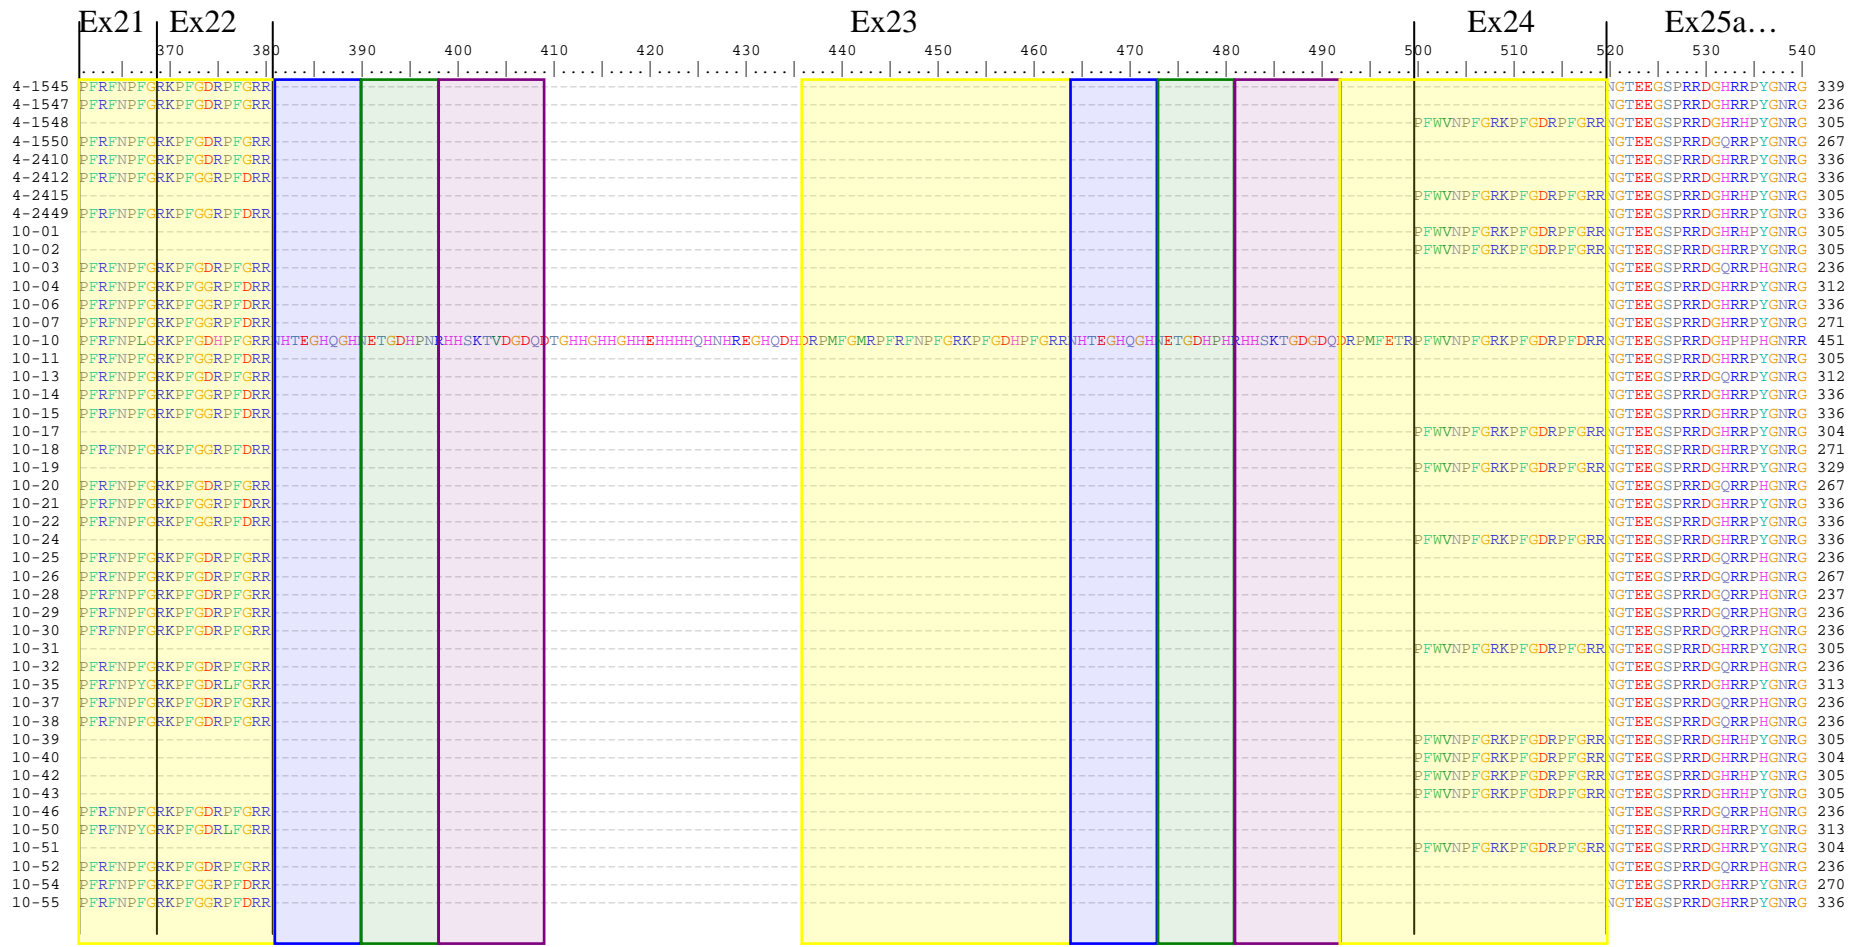

...Repeat 4.2

Repeat 3.3

Repeat 2.3

Repeat 5.2

Repeat 4.3

Repeat 3.4

Repeat 2.4

Repeat 5.3

Repeat 4.4
