# Supplementary material for: Extraordinary diversity among members of the large gene family, 185/333, from the purple sea urchin, Strongylocentrotus purpuratus
Source: PubMed Central journal article supplement (PMC1988830; doi:10.1186/1471-2199-8-68), 2007-08-15
Supplement: 1471-2199-8-68-S4.pdf [file 1471-2199-8-68-S4.pdf]

Additional File 4: Characteristics of the elements from the cDNA-based and repeat-based alignments.

| Element       | Length (nt) | #   | Diversity |        | Variable Positions (%) |      |      | States per variable position (average) |      | Unique Sequences |    | Unshared Polymorphisms |    |
|---------------|-------------|-----|-----------|--------|------------------------|------|------|----------------------------------------|------|------------------|----|------------------------|----|
|               |             |     | Nt        | Aa     | Ratio                  | Nt   | Aa   | Nt                                     | Aa   | Nt               | Aa | Nt                     | Aa |
| <b>Leader</b> | 55          | 121 | 0.0840    | 0.0949 | 1.13                   | 25.5 | 36.8 | 2.14                                   | 2.43 | 14               | 10 | 4                      | 3  |
| <b>Ex1</b>    | 63          | 121 | 0.0893    | 0.2268 | 2.54                   | 23.8 | 47.6 | 2.13                                   | 2.3  | 15               | 12 | 1                      | 1  |
| <b>Ex2</b>    | 48          | 121 | 0.1364    | 0.2420 | 1.77                   | 45.8 | 81.3 | 2.09                                   | 2.23 | 16               | 14 | 3                      | 2  |
| <b>Ex3</b>    | 27          | 121 | 0.1029    | 0.1193 | 1.16                   | 44.4 | 55.6 | 2.08                                   | 2.20 | 9                | 6  | 1                      | 1  |
| <b>Ex4</b>    | 75          | 121 | 0.1278    | 0.1526 | 1.19                   | 38.7 | 40.0 | 2.10                                   | 2.80 | 21               | 15 | 6                      | 7  |
| <b>Ex5</b>    | 75          | 4   | 0.0185    | 0.0277 | 1.50                   | 2.7  | 4.0  | 2.00                                   | 2.00 | 2                | 2  | 0                      | 0  |
| <b>Ex6</b>    | 75          | 46  | 0.0431    | 0.0663 | 1.54                   | 17.3 | 28.0 | 2.00                                   | 2.29 | 6                | 4  | 5                      | 6  |
| <b>Ex7</b>    | 129         | 121 | 0.0539    | 0.0929 | 1.72                   | 38.8 | 60.5 | 2.28                                   | 2.58 | 42               | 33 | 37                     | 24 |
| <b>Ex8</b>    | 15          | 121 | 0.1216    | 0.3132 | 2.58                   | 53.3 | 60.0 | 2.00                                   | 3.00 | 10               | 9  | 3                      | 2  |
| <b>Ex9</b>    | 12          | 121 | 0.0587    | 0.1147 | 1.95                   | 33.3 | 50.0 | 2.00                                   | 2.00 | 5                | 3  | 1                      | 0  |
| <b>Ex10</b>   | 21          | 83  | 0.0807    | 0.2422 | 3.00                   | 23.8 | 71.4 | 2.00                                   | 2.00 | 4                | 4  | 0                      | 0  |
| <b>Ex11</b>   | 66          | 4   | 0.0000    | 0.0000 | n/a                    | n/a  | n/a  | n/a                                    | n/a  | 1                | 1  | 0                      | 0  |
| <b>Ex12</b>   | 21          | 38  | 0.0766    | 0.1267 | 1.65                   | 19.1 | 28.6 | 2.00                                   | 2.00 | 4                | 3  | 0                      | 0  |
| <b>Ex13</b>   | 51          | 97  | 0.0799    | 0.1416 | 1.77                   | 21.6 | 35.3 | 2.09                                   | 2.17 | 8                | 6  | 1                      | 1  |
| <b>Ex14</b>   | 54          | 101 | 0.1058    | 0.2643 | 2.50                   | 29.6 | 61.1 | 2.00                                   | 2.27 | 10               | 9  | 1                      | 1  |
| <b>Ex15</b>   | 54          | 101 | 0.4702    | 0.4977 | 1.06                   | 88.9 | 88.9 | 2.25                                   | 2.50 | 11               | 12 | 0                      | 0  |
| <b>Ex15a</b>  | 51          | 2   | 0.0000    | 0.0000 | n/a                    | n/a  | n/a  | n/a                                    | n/a  | 1                | 1  | 0                      | 0  |
| <b>Ex15b</b>  | 33          | 19  | 0.0471    | 0.1412 | 3.00                   | 9.1  | 27.3 | 2.00                                   | 2.00 | 3                | 2  | 0                      | 0  |
| <b>Ex15c</b>  | 30          | 6   | 0.0000    | 0.0000 | n/a                    | n/a  | n/a  | n/a                                    | n/a  | 1                | 1  | 0                      | 0  |
| <b>Ex15d</b>  | 24          | 43  | 0.0078    | 0.0235 | 3.00                   | 4.2  | 12.5 | 2.00                                   | 2.00 | 2                | 2  | 0                      | 0  |
| <b>Ex15e</b>  | 18          | 32  | 0.0292    | 0.0000 | 0.00                   | 5.6  | 0.0  | 2.00                                   | 0.00 | 2                | 1  | 0                      | 0  |
| <b>Ex15f</b>  | 15          | 5   | 0.0000    | 0.0000 | n/a                    | n/a  | n/a  | n/a                                    | n/a  | 1                | 1  | 0                      | 0  |
| <b>Ex15g</b>  | 48          | 2   | 0.0000    | 0.0000 | n/a                    | n/a  | n/a  | n/a                                    | n/a  | 1                | 1  | 0                      | 0  |
| <b>Ex16</b>   | 21          | 69  | 0.0718    | 0.0978 | 1.36                   | 14.3 | 14.3 | 2.00                                   | 2.00 | 4                | 2  | 0                      | 0  |
| <b>Ex17</b>   | 75          | 65  | 0.0714    | 0.1303 | 1.82                   | 21.3 | 32.0 | 2.06                                   | 2.50 | 13               | 11 | 5                      | 5  |
| <b>Ex18</b>   | 30          | 64  | 0.0139    | 0.0278 | 2.00                   | 10.0 | 20.0 | 2.00                                   | 2.00 | 3                | 3  | 0                      | 0  |
| <b>Ex19</b>   | 84          | 116 | 0.0935    | 0.0779 | 0.83                   | 25.0 | 32.1 | 2.05                                   | 2.00 | 16               | 11 | 1                      | 1  |
| <b>Ex20</b>   | 30          | 120 | 0.0619    | 0.0735 | 1.19                   | 20.0 | 30.0 | 2.33                                   | 2.67 | 8                | 6  | 2                      | 2  |

| Element      | Length<br>(nt) | #   | Diversity   |        | Variable Positions (%) |        |        | States per variable<br>position (average) |      | Unique<br>Sequences |      | Unshared<br>Polymorphisms |    |
|--------------|----------------|-----|-------------|--------|------------------------|--------|--------|-------------------------------------------|------|---------------------|------|---------------------------|----|
|              |                |     | Nt          | Aa     | Ratio                  | Nt     | Aa     | Nt                                        | Aa   | Nt                  | Aa   | Nt                        | Aa |
|              |                |     | <b>Ex21</b> | 24     | 99                     | 0.0491 | 0.0292 | 0.59                                      | 16.7 | 12.5                | 2.25 | 3.00                      | 6  |
| <b>Ex22</b>  | 36             | 100 | 0.0510      | 0.1319 | 2.59                   | 13.9   | 33.3   | 2.00                                      | 2.00 | 7                   | 5    | 0                         | 0  |
| <b>Ex23</b>  | 357            | 3   | 0.0036      | 0.0107 | 2.97                   | 0.6    | 1.7    | 2.00                                      | 2.00 | 2                   | 2    | 2                         | 2  |
| <b>Ex24</b>  | 60             | 24  | 0.0085      | 0.0256 | 3.00                   | 1.7    | 5.0    | 2.00                                      | 2.00 | 2                   | 2    | 0                         | 0  |
| <b>Ex25</b>  | 192            | 121 | 0.1266      | 0.1818 | 1.44                   | 34.9   | 50.0   | 2.22                                      | 2.56 | 53                  | 38   | 23                        | 15 |
| <b>Ex25a</b> | 138            | 121 | 0.0495      | 0.0949 | 1.92                   | 21.0   | 41.3   | 2.07                                      | 2.21 | 33                  | 21   | 10                        | 7  |
| <b>Ex25b</b> | 54             | 121 | 0.3237      | 0.4039 | 1.25                   | 70.4   | 72.2   | 2.34                                      | 3.08 | 26                  | 18   | 13                        | 8  |
| <b>Er1</b>   | 92             | 121 | 0.0888      | 0.2058 | 2.32                   | 29.4   | 58.1   | 2.07                                      | 2.22 | 21                  | 17   | 3                         | 2  |
| <b>Er2</b>   | 75             | 121 | 0.1272      | 0.2937 | 2.31                   | 42.7   | 76.0   | 2.09                                      | 2.37 | 24                  | 21   | 4                         | 2  |
| <b>Er3</b>   | 75             | 46  | 0.0514      | 0.1145 | 2.23                   | 22.7   | 40.0   | 2.00                                      | 2.30 | 7                   | 7    | 8                         | 6  |
| <b>Er4</b>   | 75             | 4   | 0.0092      | 0.0277 | 3.01                   | 1.3    | 4.0    | 2.00                                      | 2.00 | 2                   | 2    | 0                         | 0  |
| <b>Er5</b>   | 76             | 121 | 0.0886      | 0.2125 | 2.40                   | 40.8   | 65.4   | 2.16                                      | 2.77 | 19                  | 19   | 16                        | 17 |
| <b>Er6</b>   | 147            | 121 | 0.0715      | 0.1468 | 2.05                   | 38.8   | 65.3   | 2.23                                      | 2.50 | 50                  | 44   | 32                        | 21 |
| <b>Er7</b>   | 66             | 4   | 0.0000      | 0.0000 | n/a                    | n/a    | n/a    | n/a                                       | n/a  | 1                   | 1    | 0                         | 0  |
| <b>Er8</b>   | 51             | 97  | 0.0799      | 0.1416 | 1.77                   | 21.6   | 35.3   | 2.09                                      | 2.17 | 8                   | 6    | 1                         | 1  |
| <b>Er9</b>   | 45             | 101 | 0.0935      | 0.2167 | 2.32                   | 26.7   | 53.3   | 2.00                                      | 2.25 | 9                   | 8    | 0                         | 0  |
| <b>Er10</b>  | 84             | 101 | 0.2554      | 0.3463 | 1.36                   | 58.3   | 64.3   | 2.23                                      | 2.61 | 12                  | 11   | 1                         | 1  |
| <b>Er10a</b> | 60             | 2   | 0.0000      | 0.0000 | n/a                    | n/a    | n/a    | n/a                                       | n/a  | 1                   | 1    | 0                         | 0  |
| <b>Er10b</b> | 43             | 19  | 0.0621      | 0.1198 | 1.93                   | 11.6   | 0.2    | 2.00                                      | 2.00 | 11                  | 11   | 0                         | 0  |
| <b>Er10c</b> | 39             | 6   | 0.0000      | 0.0000 | n/a                    | n/a    | n/a    | n/a                                       | n/a  | 1                   | 1    | 0                         | 0  |
| <b>Er10d</b> | 33             | 39  | 0.0097      | 0.0292 | 3.01                   | 6.06   | 18.2   | 2.00                                      | 2.00 | 36                  | 36   | 1                         | 1  |
| <b>Er10e</b> | 33             | 39  | 0.1172      | 0.1005 | 0.85                   | 21.2   | 18.2   | 2.00                                      | 2.00 | 22                  | 22   | 0                         | 0  |
| <b>Er10f</b> | 24             | 4   | 0.0000      | 0.0000 | n/a                    | n/a    | n/a    | n/a                                       | n/a  | 1                   | 1    | 0                         | 0  |
| <b>Er10g</b> | 57             | 2   | 0.0000      | 0.0000 | n/a                    | n/a    | n/a    | n/a                                       | n/a  | 1                   | 1    | 0                         | 0  |
| <b>Er11</b>  | 21             | 101 | 0.0860      | 0.1192 | 1.39                   | 28.6   | 14.3   | 2.00                                      | 3.00 | 6                   | 3    | 1                         | 0  |
| <b>Er12</b>  | 88             | 3   | 0.0000      | 0.0000 | n/a                    | n/a    | n/a    | n/a                                       | n/a  | 1                   | 1    | 0                         | 0  |
| <b>Er13</b>  | 23             | 3   | 0.0000      | 0.0000 | n/a                    | n/a    | n/a    | n/a                                       | n/a  | 1                   | 1    | 0                         | 0  |
| <b>Er14</b>  | 23             | 100 | 0.0723      | 0.0387 | 0.54                   | 21.7   | 25.0   | 2.00                                      | 2.00 | 5                   | 3    | 1                         | 1  |
| <b>Er15</b>  | 33             | 3   | 0.0193      | 0.0579 | 3.00                   | 3.0    | 9.1    | 2.00                                      | 2.00 | 2                   | 1    | 1                         | 1  |
| <b>Er16</b>  | 11             | 68  | 0.0070      | 0.0000 | 0                      | 9.1    | 0.0    | 2.00                                      | 0.00 | 2                   | 1    | 1                         | 0  |

| Element      | Length<br>(nt) | #   | Diversity |        |       | Variable Positions (%) |      | States per variable<br>position (average) |      | Unique<br>Sequences |    | Unshared<br>Polymorphisms |    |
|--------------|----------------|-----|-----------|--------|-------|------------------------|------|-------------------------------------------|------|---------------------|----|---------------------------|----|
|              |                |     | Nt        | Aa     | Ratio | Nt                     | Aa   | Nt                                        | Aa   | Nt                  | Aa | Nt                        | Aa |
| <b>Er17</b>  | 14             | 65  | 0.1785    | 0.2638 | 1.48  | 42.9                   | 80.0 | 2.00                                      | 2.25 | 6                   | 6  | 1                         | 1  |
| <b>Er18</b>  | 49             | 3   | 0.0000    | 0.0000 | n/a   | n/a                    | n/a  | n/a                                       | n/a  | 1                   | 1  | 0                         | 0  |
| <b>Er19</b>  | 22             | 3   | 0.0289    | 0.0000 | 0.00  | 4.6                    | 0.0  | 2.00                                      | 0.00 | 2                   | 1  | 1                         | 0  |
| <b>Er20</b>  | 27             | 3   | 0.0000    | 0.0000 | n/a   | n/a                    | n/a  | n/a                                       | n/a  | 1                   | 1  | 0                         | 0  |
| <b>Er21</b>  | 26             | 67  | 0.0602    | 0.1191 | 1.98  | 19.2                   | 22.2 | 2.20                                      | 3.00 | 7                   | 5  | 1                         | 1  |
| <b>Er22</b>  | 30             | 67  | 0.0398    | 0.0878 | 2.21  | 16.7                   | 30.0 | 2.00                                      | 2.00 | 5                   | 4  | 0                         | 0  |
| <b>Er23</b>  | 28             | 87  | 0.0346    | 0.0970 | 2.80  | 10.7                   | 30.0 | 2.00                                      | 2.00 | 4                   | 4  | 0                         | 0  |
| <b>Er24</b>  | 23             | 87  | 0.0300    | 0.0078 | 0.26  | 8.7                    | 12.5 | 2.00                                      | 2.00 | 3                   | 2  | 1                         | 1  |
| <b>Er25</b>  | 34             | 119 | 0.0513    | 0.1309 | 2.56  | 14.7                   | 33.3 | 2.00                                      | 2.00 | 8                   | 6  | 0                         | 0  |
| <b>Er26</b>  | 90             | 121 | 0.0728    | 0.1192 | 1.64  | 42.2                   | 50.0 | 2.21                                      | 2.33 | 22                  | 12 | 33                        | 12 |
| <b>Er27</b>  | 192            | 121 | 0.1277    | 0.1855 | 1.45  | 35.4                   | 50.0 | 2.28                                      | 2.59 | 56                  | 40 | 23                        | 14 |
| <b>Er27a</b> | 138            | 121 | 0.0495    | 0.0949 | 1.92  | 21.0                   | 41.3 | 2.07                                      | 2.21 | 33                  | 21 | 10                        | 7  |
| <b>Er27b</b> | 54             | 121 | 0.3276    | 0.4168 | 1.27  | 72.2                   | 72.2 | 2.44                                      | 3.15 | 27                  | 18 | 13                        | 7  |
