# Supplementary material for: Extraordinary diversity among members of the large gene family, 185/333, from the purple sea urchin, Strongylocentrotus purpuratus
Source: PubMed Central journal article supplement (PMC1988830; doi:10.1186/1471-2199-8-68), 2007-08-15
Supplement: 1471-2199-8-68-S6.pdf [file 1471-2199-8-68-S6.pdf]

**Additional File 6: Repeat-based alignment of the unique gene sequences.** Only the second exon is shown, because the leader and intron alignments are identical to those shown in Additional Files 2 and 3. Element borders are indicated by vertical black lines, and are labeled above the sequence. Repeats are indicated by shaded boxes, which each different color (red = type 1; blue = type 2; green = type 3; yellow = type 4; and purple = type 5).

Er1

Er2

Er3...

10 20 30 40 50 60 70 80 90 100 110 120 130 140 150 160 170 180

Table of DNA sequences with 180 rows and columns. The first column contains row numbers (2-05 to 2-1544). The table is divided into three vertical sections: Er1 (columns 1-90), Er2 (columns 100-180), and Er3... (columns 170-180). The Er2 and Er3... sections are highlighted with a light red background. The sequences consist of uppercase letters (A, C, G, T) representing nucleotides.

Repeat 1.1

Repeat 1.2...





...Er3 Er4 Er5

190 200 210 220 230 240 250 260 270 280 290 300 310 320 330 340 350 360

|        |                                                                    |     |
|--------|--------------------------------------------------------------------|-----|
| 4-1545 | CGGAGACAAGATGGTGGACCAATGGGTGGAAGGAGGTTTCGATGGACCTGGATTTGGTGCCCC    | 285 |
| 4-1547 | ACAAATGGATGGACCGAGACAAAATGGCGGTCCGATGGGTGGT                        | 210 |
| 4-1548 | ACATATGGATGGACCGAGACAAAATGGCGGTCCGATGGGTGGT                        | 210 |
| 4-1550 | ACAAATGGAAGGACCGAGACAAAATGGCGGTCCGATGGGTGGT                        | 210 |
| 4-2410 | CGGAGACAAGATGGTGGACCAATGGGTGGAAGGAGGTTTCGATGGACCTGGATTTGGTGCCCC    | 285 |
| 4-2412 | CGGAGACAAGATGGTGGACCAATGGGTGGAAGGAGGTTTCGATGGACCTGGATTTGGTGCCCC    | 285 |
| 4-2415 | ACATATGGATGGACCGAGACAAAATGGCGGTCCGATGGGTGGT                        | 210 |
| 4-2449 | CGGAGACAAGATGGTGGACCAATGGGTGGAAGGAGGTTTCGATGGACCTGGATTTGGTGCCCC    | 285 |
| 10-01  | ACATATGGATGGACCGAGACAAAATGGCGGTCCGATGGGTGGT                        | 210 |
| 10-02  | GCAGATGGATGGACCGAGACAAAATGGCGGTCCGATGGGTGGT                        | 210 |
| 10-03  | ACAAATGGATGGACCGAGACAAAATGGCGGTCCGATGGGTGGT                        | 210 |
| 10-04  | ACAGATGGATGGACCGAGACAAAATGGCGGTCCGATGGGTGGT                        | 210 |
| 10-06  | CGGAGACAAGATGGTGGACCAATGGGTGGAAGGAGGTTTCGATGGACCTGGAATTTGGTGCCCC   | 285 |
| 10-07  | ACAGATGGATGGACCGAGACAAAATGGCGGTCCGATGGGTGGT                        | 210 |
| 10-10  | CCATAGGCAAAAATGGTGGACCAATGGGTGGAAGGAGGTTTCGATGGACCTAGATTTTGGTGCCCC | 360 |
| 10-11  | ACATATGGATGGACCGAGACAAAATGGCGGTCCGATGGGTGGT                        | 210 |
| 10-13  | CCATAGGCAAAAATGGTGGACCAATGGGTGGAAGGAGGTTTCGATGGACCTAGATTTTGGTGCCCC | 360 |
| 10-14  | CGGAGACAAGATGGTGGACCAATGGGTGGAAGGAGGTTTCGATGGACCTGGATTTGGTGCCCC    | 285 |
| 10-15  | CGGAGACAAGATGGTGGACCAATGGGTGGAAGGAGGTTTCGATGGACCTGGATTTGGTGCCCC    | 285 |
| 10-17  | GCAGATGGATGGACCGAGACAAAATGGCGGTCCGATGGGTGGT                        | 210 |
| 10-18  | GCAGATGGATGGACCGAGACAAAATGGCGGTCCGATGGGTGGT                        | 210 |
| 10-19  | CGGAGACAAGATGGTGGACCAATGGGTGGAAGGAGGTTTCGATGGACCTGGATTTGGTGCCCC    | 285 |
| 10-20  | ACAAATGGAAGGACCGAGACAAAATGGCGGTCCGATGGGTGGT                        | 210 |
| 10-21  | CGGAGACAAGATGGTGGACCAATGGGTGGAAGGAGGTTTCGATGGACCTGGATTTGGTGCCCC    | 285 |
| 10-22  | CGGAGACAAGATGGTGGACCAATGGGTGGAAGGAGGTTTCGATGGACCTGGATTTGGTGCCCC    | 285 |
| 10-24  | CGGAGACAAGATGGTGGACCAATGGGTGGAAGGAGGTTTCGATGGACCTGGATTTGGTGCCCC    | 285 |
| 10-25  | ACAAATGGATGGACCGAGACAAAATGGCGGTCCGATGGGTGGT                        | 210 |
| 10-26  | ACAAATGGAAGGACCGAGACAAAATGGCGGTCCGATGGGTGGT                        | 210 |
| 10-28  | ACAAATGGATGGACCGAGACAAAATGGCGGTCCGATGGGTGGT                        | 210 |
| 10-29  | ACAAATGGATGGACCGAGACAAAATGGCGGTCCGATGGGTGGT                        | 210 |
| 10-30  | ACAAATGGATGGACCGAGACAAAATGGCGGTCCGATGGGTGGT                        | 210 |
| 10-31  | GCAGATGGATGGACCGAGACAAAATGGCGGTCCGATGGGTGGT                        | 210 |
| 10-32  | ACAAATGGATGGACCGAGACAAAATGGCGGTCCGATGGGTGGT                        | 210 |
| 10-35  | GCAGATGGATGGACCGAGACAAAATGGCGGTCCGATGGGTGGT                        | 210 |
| 10-37  | ACAAATGGATGGACCGAGACAAAATGGCGGTCCGATGGGTGGT                        | 210 |
| 10-38  | ACAAATGGATGGACCGAGACAAAATGGCGGTCCGATGGGTGGT                        | 210 |
| 10-39  | ACATATGGATGGACCGAGACAAAATGGCGGTCCGATGGGTGGT                        | 210 |
| 10-40  | GCAGATGGATGGACCGAGACAAAATGGCGGTCCGATGGGTGGT                        | 210 |
| 10-42  | ACATATGGATGGACCGAGACAAAATGGCGGTCCGATGGGTGGT                        | 210 |
| 10-43  | ACATATGGATGGACCGAGACAAAATGGCGGTCCGATGGGTGGT                        | 210 |
| 10-46  | ACAAATGGATGGACCGAGACAAAATGGCGGTCCGATGGGTGGT                        | 210 |
| 10-50  | GCAGATGGATGGACCGAGACAAAATGGCGGTCCGATGGGTGGT                        | 210 |
| 10-51  | GCAGATGGATGGACCGAGACAAAATGGCGGTCCGATGGGTGGT                        | 210 |
| 10-52  | GCAGATGGATGGACCGAGACAAAATGGCGGTCCGATGGGTGGT                        | 210 |
| 10-54  | ACAGATGGATGGACCGAGACAAAATGGCGGTCCGATGGGTGGT                        | 210 |
| 10-55  | CGGAGACAAGATGGTGGACCAATGGGTGGAAGGAGGTTTCGATGGACCTGGATTTGGTGCCCC    | 285 |

...Repeat 1.2

Repeat 1.3

Repeat 1.4...









|        | Er7                                                               | Er8                                                   | Er9                                           | Er10...       |
|--------|-------------------------------------------------------------------|-------------------------------------------------------|-----------------------------------------------|---------------|
|        | 550 560 570 580 590 600                                           | 610 620 630 640 650                                   | 660 670 680 690 700                           | 710 720       |
| 4-1545 |                                                                   | CACCGTCAAGGTCCTCCTCAGGACCGCCAGAGGAACAAACCGTTTCGGTCAG  | GCAACTACAGCAGCGAGGAGGATGGCCGACCTCACCCCTCACCAC | CATCGCCAC 570 |
| 4-1547 |                                                                   |                                                       |                                               | 390           |
| 4-1548 |                                                                   | CACCGTCAAGGTCACCTCAGGACCGACCAGAGGAACAAACCGTTTCGGTCAG  | GCAAATGAACGCAACGAGGAGGATGGCCGTCTCACCCCTCACCAC | CATGGCCAC 495 |
| 4-1550 |                                                                   | CACCGTCAAGGTCCTCCTCAGGACCGACCAGAGGAACAAACCGTTTCGGTCAG | GCAAACGAAAGCAGCGATGAGGATGGCCGTCTCACCCCTCACCAC | 486           |
| 4-2410 |                                                                   | CACCGTCAAGGTCATCCTCAGGACCAAGCAGAGGAACAAACCGTTTAGTCAG  | GCAAACGAAAGCAGCGAGGAGGATGGCCGTCTCACCCCTCACCAC | 561           |
| 4-2412 |                                                                   | CACCGTCAAGGTCATCCTCAGGACCAAGCAGAGGAACAAACCGTTTCGGTCAG | GCAAACGAAAGCAGCGAGGAGGATGGCCGTCTCACCCCTCACCAC | 561           |
| 4-2415 |                                                                   | CACCGTCAAGGTCACCTCAGGACCGACCAGAGGAACAAACCGTTTCGGTCAG  | GCAAATGAACGCAACGAGGAGGATGGCCGTCTCACCCCTCACCAC | CATGGCCAC 495 |
| 4-2449 |                                                                   | CACCGTCAAGGTCATCCTCAGGACCAAGCAGAGGAACAAACCGTTTCGGTCAG | GCAAACGAAAGCAGCGAGGAGGATGGCCGTCTCACCCCTCACCAC | 561           |
| 10-01  |                                                                   | CACCGTCAAGGTCACCTCAGGACCGACCAGAGGAACAAACCGTTTCGGTCAG  | GCAAATGAACGCAACGAGGAGGATAGCCGTCTCACCCCTCACCAC | CATCGCCAC 495 |
| 10-02  |                                                                   | CACCGTCAAGGTCACCTCAGGACCGACCAGAGGAACAAACCGTTTCGGTCAG  | GCAACTACAGCAGCGAGGAGGATGGCCGTCTCACCCCTCACCAC  | CATGGCCAC 495 |
| 10-03  |                                                                   |                                                       |                                               | 390           |
| 10-04  |                                                                   | CACCGTCGAGGTCATCCTCAGGACCAAGCAGAGGAACAAACCGTTTCGGTCAG | GCAAACGAAAGCAGCGAGGAGGATGGCCGTCTCACCCCTCACCAC | 486           |
| 10-06  |                                                                   | CACCGTCGAGGTCATCCTCAGGACCAAGCAGAGGAACAAACCGTTTCGGTCAG | GCAAACGAAAGCAGCGAGGAGGATGGCCGTCTCACCCCTCACCAC | 561           |
| 10-07  |                                                                   | CACCGTCAAGGACCACTCAGGATCGATCAGAGGAACAAACCGTTTCGGTCAG  | GCAAATGAAGCAGCGAGGAGGATGGCCGTCTCACCCCTCACCAC  | CATCGCCAC 495 |
| 10-10  | CATCATCAAGGTGCAGGAAGACCTTTCTTCGGCAATCCTCCTCTTTAAACCAGAACAGGAAACCG |                                                       | GCAAACGAGCAGCGAGGAGGATGGCCGTCTCACCCCTCACCAC   | GATCGCCAC 660 |
| 10-11  |                                                                   | CACCGTCAAGGTCACCTCAGGACCGACCAGAGGAACAAACCGTTTCGGTCAG  | GCAAATGAACGCAACGAGGAGGATAGCCGTCTCACCCCTCACCAC | CATCGCCAC 495 |
| 10-13  | CATCATCAAGGTGCAGGAAGACCTTTCTTCGGCAATCCTCCTCTTTAAACCAGAACAGGAAACCG |                                                       | GCAAACGAGCAGCGAGGAGGATGGCCGTCTCACCCCTCACCAC   | GATCGCCAC 660 |
| 10-14  |                                                                   | CACCGTCAAGGTCATCCTCAGGACCAAGCAGAGGAACAAACCGTTTCGGTCAG | GCAAACGAAAGCAGCGAGGAGGATGGCCGTCTCACCCCTCACCAC | 561           |
| 10-15  |                                                                   | CACCGTCAAGGTCATCCTCAGGACCAAGCAGAGGAACAAACCGTTTCGGTCAG | GCAAACGAAAGCAGCGAGGAGGATGGCCGTCTCACCCCTCACCAC | 561           |
| 10-17  |                                                                   | CACCGTCAAGGTCACCTCAGGACCGACCAGAGGAACAAACCGTTTCGGTCAG  | GCAACTACAGCAACGAGGAGGATGGCCGTCTCACCCCTCACCAC  | CATGGCCAC 495 |
| 10-18  |                                                                   | CACCGTCAAGGACCACTCAGGATCGATCAGAGGAACAAACCGTTTCGGTCAG  | GCAAATGAAGCAGCGAGGAGGATGGCCGTCTCACCCCTCACCAC  | CATCGCCAC 495 |
| 10-19  |                                                                   | CACCGTCAAGGTCACCTCAGGACCGACCAGAGGAACAAACCGTTTCGGTCAG  | GCAACTACAGCAACGAGGAGGATGGCCGTCTCACCCCTCACCAC  | CATGGCCAC 570 |
| 10-20  |                                                                   | CACCGTCAAGGTCCTCCTCAGGACCGACCAGAGGAACAAACCGTTTCGGTCAG | GCAAACGAAAGCAGCGATGAGGATGGCCGTCTCACCCCTCACCAC | 486           |
| 10-21  |                                                                   | CACCGTCAAGGTCATCCTCAGGACCAAGCAGAGGAACAAACCGTTTCGGTCAG | GCAAACGAAAGCAGCGAGGAGGATGGCCGTCTCACCCCTCACCAC | 561           |
| 10-22  |                                                                   | CACCGTCAAGGTCATCCTCAGGACCAAGCAGAGGAACAAACCGTTTCGGTCAG | GCAAACGAAAGCAGCGAGGAGGATGGCCGTCTCACCCCTCACCAC | 561           |
| 10-24  |                                                                   | CACCGTCAAGGTCATCCTCAGGACCAAGCAGAGGAACAAACCGTTTCGGTCAG | GCAAACGAAAGCAGCGAGGAGGATGGCCGTCTCACCCCTCACCAC | 561           |
| 10-25  |                                                                   |                                                       |                                               | 390           |
| 10-26  |                                                                   | CACCGTCAAGGTCCTCCTCAGGACCGACCAGAGGAACAAACCGTTTCGGTCAG | GCAAACGAAAGCAGCGATGAGGATGGCCGTCTCACCCCTCACCAC | 486           |
| 10-28  |                                                                   |                                                       |                                               | 390           |
| 10-29  |                                                                   |                                                       |                                               | 390           |
| 10-30  |                                                                   |                                                       |                                               | 390           |
| 10-31  |                                                                   | CACCGTCAAGGTCACCTCAGGACCGACCAGAGGAACAAACCGTTTCGGTCAG  | GCAACTACAGCAACGAGGAGGATGGCCGTCTCACCCCTCACCAC  | CATGGCCAC 495 |
| 10-32  |                                                                   |                                                       |                                               | 390           |
| 10-35  |                                                                   | CACCGTCAAGGTCCTCCTCAGGACCGCCAGAGGAACAAACCGTTTCGGTCAG  | GCAACTACAGCAGCGAGGAGGATGGCCGACCTCACCCCTCACCAC | CATCGCCAC 495 |
| 10-37  |                                                                   |                                                       |                                               | 390           |
| 10-38  |                                                                   |                                                       |                                               | 390           |
| 10-39  |                                                                   | CACCGTCAAGGTCACCTCAGGACCGACCAGAGGAACAAACCGTTTCGGTCAG  | GCAAATGAACGCAACGAGGAGGATAGCCGTCTCACCCCTCACCAC | CATCGCCAC 495 |
| 10-40  |                                                                   | CACCGTCAAGGTCACCTCAGGACCGACCAGAGGAACAAACCGTTTCGGTCAG  | GCAACTACAGCAACGAGGAGGATGGCCGTCTCACCCCTCACCAC  | CATGGCCAC 495 |
| 10-42  |                                                                   | CACCGTCAAGGTCACCTCAGGACCGACCAGAGGAACAAACCGTTTCGGTCAG  | GCAAATGAACGCAACGAGGAGGATAGCCGTCTCACCCCTCACCAC | CATCGCCAC 495 |
| 10-43  |                                                                   | CACCGTCAAGGTCACCTCAGGACCGACCAGAGGAACAAACCGTTTCGGTCAG  | GCAAATGAACGCAACGAGGAGGATAGCCGTCTCACCCCTCACCAC | CATCGCCAC 495 |
| 10-46  |                                                                   |                                                       |                                               | 390           |
| 10-50  |                                                                   | CACCGTCAAGGTCCTCCTCAGGACCGCCAGAGGAACAAACCGTTTCGGTCAG  | GCAACTACAGCAGCGAGGAGGATGGCCGACCTCACCCCTCACCAC | CATCGCCAC 495 |
| 10-51  |                                                                   | CACCGTCAAGGTCACCTCAGGACCGACCAGAGGAACAAACCGTTTCGGTCAG  | GCAACTACAGCAACGAGGAGGATGGCCGTCTCACCCCTCACCAC  | CATGGCCAC 495 |
| 10-52  |                                                                   |                                                       |                                               | 390           |
| 10-54  |                                                                   | CACCGTCAAGGTCCTCCTCAGGACCGCCAGAGGAACAAACCGTTTCGGTCAG  | GCAAATGAAGCAGCGAGGAGGATGGCCGTCTCACCCCTCACCAC  | CATCGCCAC 495 |
| 10-55  |                                                                   | CACCGTCAAGGTCATCCTCAGGACCAAGCAGAGGAACAAACCGTTTCGGTCAG | GCAAACGAAAGCAGCGAGGAGGATGGCCGTCTCACCCCTCACCAC | 561           |

| ...Er10 |            |          |          |        | Er11      |                 | Er12            |        |                |         |           |             |           |                |           |         |         |       |     | Er13... |     |  |  |  |  |  |  |  |  |  |  |     |  |  |  |  |  |  |  |  |  |  |  |  |     |  |  |  |  |  |  |  |  |  |  |  |  |     |  |  |  |  |  |  |  |  |  |  |  |  |     |  |  |  |  |  |  |  |  |  |  |  |  |     |  |  |  |  |  |  |  |  |  |  |  |  |     |  |  |  |  |  |  |  |  |  |  |  |  |     |  |  |  |  |  |  |  |  |  |  |  |  |     |  |  |  |  |  |  |  |  |  |  |  |  |     |  |  |  |  |  |  |  |  |  |  |  |  |
|---------|------------|----------|----------|--------|-----------|-----------------|-----------------|--------|----------------|---------|-----------|-------------|-----------|----------------|-----------|---------|---------|-------|-----|---------|-----|--|--|--|--|--|--|--|--|--|--|-----|--|--|--|--|--|--|--|--|--|--|--|--|-----|--|--|--|--|--|--|--|--|--|--|--|--|-----|--|--|--|--|--|--|--|--|--|--|--|--|-----|--|--|--|--|--|--|--|--|--|--|--|--|-----|--|--|--|--|--|--|--|--|--|--|--|--|-----|--|--|--|--|--|--|--|--|--|--|--|--|-----|--|--|--|--|--|--|--|--|--|--|--|--|-----|--|--|--|--|--|--|--|--|--|--|--|--|-----|--|--|--|--|--|--|--|--|--|--|--|--|
| 730     |            |          |          |        | 740       |                 | 750             |        | 760            |         | 770       |             | 780       |                | 790       |         | 800     |       | 810 |         |     |  |  |  |  |  |  |  |  |  |  | 820 |  |  |  |  |  |  |  |  |  |  |  |  | 830 |  |  |  |  |  |  |  |  |  |  |  |  | 840 |  |  |  |  |  |  |  |  |  |  |  |  | 850 |  |  |  |  |  |  |  |  |  |  |  |  | 860 |  |  |  |  |  |  |  |  |  |  |  |  | 870 |  |  |  |  |  |  |  |  |  |  |  |  | 880 |  |  |  |  |  |  |  |  |  |  |  |  | 890 |  |  |  |  |  |  |  |  |  |  |  |  | 900 |  |  |  |  |  |  |  |  |  |  |  |  |
| 2-05    | CATCGCCACC | TGGCCAC  | CACCA    | CCGT   | CATCAT    | AACCACACAGAAGGT | CACCAA          |        |                |         |           |             |           |                |           |         |         |       |     |         | 615 |  |  |  |  |  |  |  |  |  |  |     |  |  |  |  |  |  |  |  |  |  |  |  |     |  |  |  |  |  |  |  |  |  |  |  |  |     |  |  |  |  |  |  |  |  |  |  |  |  |     |  |  |  |  |  |  |  |  |  |  |  |  |     |  |  |  |  |  |  |  |  |  |  |  |  |     |  |  |  |  |  |  |  |  |  |  |  |  |     |  |  |  |  |  |  |  |  |  |  |  |  |     |  |  |  |  |  |  |  |  |  |  |  |  |     |  |  |  |  |  |  |  |  |  |  |  |  |
| 2-06    | CATGG      | CCA      | CCACCA   | CCGT   | CATCAT    | AACCAGACAGAGGGT | CACCAA          |        |                |         |           |             |           |                |           |         |         |       |     |         | 531 |  |  |  |  |  |  |  |  |  |  |     |  |  |  |  |  |  |  |  |  |  |  |  |     |  |  |  |  |  |  |  |  |  |  |  |  |     |  |  |  |  |  |  |  |  |  |  |  |  |     |  |  |  |  |  |  |  |  |  |  |  |  |     |  |  |  |  |  |  |  |  |  |  |  |  |     |  |  |  |  |  |  |  |  |  |  |  |  |     |  |  |  |  |  |  |  |  |  |  |  |  |     |  |  |  |  |  |  |  |  |  |  |  |  |     |  |  |  |  |  |  |  |  |  |  |  |  |
| 2-07    | CATCGCCACC | TGGCCAC  | CACCA    | CCGT   | CATCAT    | AACCACACAGAAGGT | CACCAA          |        |                |         |           |             |           |                |           |         |         |       |     |         | 615 |  |  |  |  |  |  |  |  |  |  |     |  |  |  |  |  |  |  |  |  |  |  |  |     |  |  |  |  |  |  |  |  |  |  |  |  |     |  |  |  |  |  |  |  |  |  |  |  |  |     |  |  |  |  |  |  |  |  |  |  |  |  |     |  |  |  |  |  |  |  |  |  |  |  |  |     |  |  |  |  |  |  |  |  |  |  |  |  |     |  |  |  |  |  |  |  |  |  |  |  |  |     |  |  |  |  |  |  |  |  |  |  |  |  |     |  |  |  |  |  |  |  |  |  |  |  |  |
| 2-08    | CATCGCCACC | TGGCCAC  | CACCA    | CCGT   | CATCAT    | AACCACACAGAAGGT | CACCAA          |        |                |         |           |             |           |                |           |         |         |       |     |         | 615 |  |  |  |  |  |  |  |  |  |  |     |  |  |  |  |  |  |  |  |  |  |  |  |     |  |  |  |  |  |  |  |  |  |  |  |  |     |  |  |  |  |  |  |  |  |  |  |  |  |     |  |  |  |  |  |  |  |  |  |  |  |  |     |  |  |  |  |  |  |  |  |  |  |  |  |     |  |  |  |  |  |  |  |  |  |  |  |  |     |  |  |  |  |  |  |  |  |  |  |  |  |     |  |  |  |  |  |  |  |  |  |  |  |  |     |  |  |  |  |  |  |  |  |  |  |  |  |
| 2-09    | CATGG      | CCA      | CCACCA   | CCGT   | CATCAT    | AACCAGACAGAGGGT | CACCAA          |        |                |         |           |             |           |                |           |         |         |       |     |         | 531 |  |  |  |  |  |  |  |  |  |  |     |  |  |  |  |  |  |  |  |  |  |  |  |     |  |  |  |  |  |  |  |  |  |  |  |  |     |  |  |  |  |  |  |  |  |  |  |  |  |     |  |  |  |  |  |  |  |  |  |  |  |  |     |  |  |  |  |  |  |  |  |  |  |  |  |     |  |  |  |  |  |  |  |  |  |  |  |  |     |  |  |  |  |  |  |  |  |  |  |  |  |     |  |  |  |  |  |  |  |  |  |  |  |  |     |  |  |  |  |  |  |  |  |  |  |  |  |
| 2-11    | CATGGC     | CGCCA    | CCACCAG  | CAT    | CATCATCGC | AACCACACAGAAGGT | CACCAA          |        |                |         |           |             |           |                |           |         |         |       |     |         | 537 |  |  |  |  |  |  |  |  |  |  |     |  |  |  |  |  |  |  |  |  |  |  |  |     |  |  |  |  |  |  |  |  |  |  |  |  |     |  |  |  |  |  |  |  |  |  |  |  |  |     |  |  |  |  |  |  |  |  |  |  |  |  |     |  |  |  |  |  |  |  |  |  |  |  |  |     |  |  |  |  |  |  |  |  |  |  |  |  |     |  |  |  |  |  |  |  |  |  |  |  |  |     |  |  |  |  |  |  |  |  |  |  |  |  |     |  |  |  |  |  |  |  |  |  |  |  |  |
| 2-12    | CATGGC     | CGCCA    | CCACCAG  | CAT    | CATCATCGC | AACCACACAGAAGGT | CACCAA          |        |                |         |           |             |           |                |           |         |         |       |     |         | 537 |  |  |  |  |  |  |  |  |  |  |     |  |  |  |  |  |  |  |  |  |  |  |  |     |  |  |  |  |  |  |  |  |  |  |  |  |     |  |  |  |  |  |  |  |  |  |  |  |  |     |  |  |  |  |  |  |  |  |  |  |  |  |     |  |  |  |  |  |  |  |  |  |  |  |  |     |  |  |  |  |  |  |  |  |  |  |  |  |     |  |  |  |  |  |  |  |  |  |  |  |  |     |  |  |  |  |  |  |  |  |  |  |  |  |     |  |  |  |  |  |  |  |  |  |  |  |  |
| 2-15    | CATGGC     | CGCCA    | CCACCAG  | CAC    | CATCATCGT | AACCGCACAGAAGGT | CACCAA          |        |                |         |           |             |           |                |           |         |         |       |     |         | 537 |  |  |  |  |  |  |  |  |  |  |     |  |  |  |  |  |  |  |  |  |  |  |  |     |  |  |  |  |  |  |  |  |  |  |  |  |     |  |  |  |  |  |  |  |  |  |  |  |  |     |  |  |  |  |  |  |  |  |  |  |  |  |     |  |  |  |  |  |  |  |  |  |  |  |  |     |  |  |  |  |  |  |  |  |  |  |  |  |     |  |  |  |  |  |  |  |  |  |  |  |  |     |  |  |  |  |  |  |  |  |  |  |  |  |     |  |  |  |  |  |  |  |  |  |  |  |  |
| 2-17    | CATGGC     | CGCCA    | CCACCAG  | CAT    | CATCATCGC | AACCACACAGAAGGT | CACCAA          |        |                |         |           |             |           |                |           |         |         |       |     |         | 537 |  |  |  |  |  |  |  |  |  |  |     |  |  |  |  |  |  |  |  |  |  |  |  |     |  |  |  |  |  |  |  |  |  |  |  |  |     |  |  |  |  |  |  |  |  |  |  |  |  |     |  |  |  |  |  |  |  |  |  |  |  |  |     |  |  |  |  |  |  |  |  |  |  |  |  |     |  |  |  |  |  |  |  |  |  |  |  |  |     |  |  |  |  |  |  |  |  |  |  |  |  |     |  |  |  |  |  |  |  |  |  |  |  |  |     |  |  |  |  |  |  |  |  |  |  |  |  |
| 2-18    | CATCGCCACC | TGGCCAC  | CACCA    | CCGT   | CATCAT    | AACCACACAGAAGGT | CACCAA          |        |                |         |           |             |           |                |           |         |         |       |     |         | 615 |  |  |  |  |  |  |  |  |  |  |     |  |  |  |  |  |  |  |  |  |  |  |  |     |  |  |  |  |  |  |  |  |  |  |  |  |     |  |  |  |  |  |  |  |  |  |  |  |  |     |  |  |  |  |  |  |  |  |  |  |  |  |     |  |  |  |  |  |  |  |  |  |  |  |  |     |  |  |  |  |  |  |  |  |  |  |  |  |     |  |  |  |  |  |  |  |  |  |  |  |  |     |  |  |  |  |  |  |  |  |  |  |  |  |     |  |  |  |  |  |  |  |  |  |  |  |  |
| 2-20    | CATGGC     | CGCCA    | CCACCAG  | CAT    | CATCATCGC | AACCACACAGAAGGT | CACCAA          |        |                |         |           |             |           |                |           |         |         |       |     |         | 537 |  |  |  |  |  |  |  |  |  |  |     |  |  |  |  |  |  |  |  |  |  |  |  |     |  |  |  |  |  |  |  |  |  |  |  |  |     |  |  |  |  |  |  |  |  |  |  |  |  |     |  |  |  |  |  |  |  |  |  |  |  |  |     |  |  |  |  |  |  |  |  |  |  |  |  |     |  |  |  |  |  |  |  |  |  |  |  |  |     |  |  |  |  |  |  |  |  |  |  |  |  |     |  |  |  |  |  |  |  |  |  |  |  |  |     |  |  |  |  |  |  |  |  |  |  |  |  |
| 2-21    | CATCGCCACC | TGGCCAC  | CACCA    | CCGT   | CATCAT    | AACCACACAGAAGGT | CACCAA          |        |                |         |           |             |           |                |           |         |         |       |     |         | 615 |  |  |  |  |  |  |  |  |  |  |     |  |  |  |  |  |  |  |  |  |  |  |  |     |  |  |  |  |  |  |  |  |  |  |  |  |     |  |  |  |  |  |  |  |  |  |  |  |  |     |  |  |  |  |  |  |  |  |  |  |  |  |     |  |  |  |  |  |  |  |  |  |  |  |  |     |  |  |  |  |  |  |  |  |  |  |  |  |     |  |  |  |  |  |  |  |  |  |  |  |  |     |  |  |  |  |  |  |  |  |  |  |  |  |     |  |  |  |  |  |  |  |  |  |  |  |  |
| 2-24    | CATCGCCACC | TGGCCAC  | CACCA    | CCGT   | CATCAT    | AACCACACAGAAGGT | CACCAA          |        |                |         |           |             |           |                |           |         |         |       |     |         | 615 |  |  |  |  |  |  |  |  |  |  |     |  |  |  |  |  |  |  |  |  |  |  |  |     |  |  |  |  |  |  |  |  |  |  |  |  |     |  |  |  |  |  |  |  |  |  |  |  |  |     |  |  |  |  |  |  |  |  |  |  |  |  |     |  |  |  |  |  |  |  |  |  |  |  |  |     |  |  |  |  |  |  |  |  |  |  |  |  |     |  |  |  |  |  |  |  |  |  |  |  |  |     |  |  |  |  |  |  |  |  |  |  |  |  |     |  |  |  |  |  |  |  |  |  |  |  |  |
| 2-25    | CATGGC     | CGCCA    | CCACCAG  | CAT    | CATCATCGC | AACCACACAGAAGGT | CACCAA          |        |                |         |           |             |           |                |           |         |         |       |     |         | 537 |  |  |  |  |  |  |  |  |  |  |     |  |  |  |  |  |  |  |  |  |  |  |  |     |  |  |  |  |  |  |  |  |  |  |  |  |     |  |  |  |  |  |  |  |  |  |  |  |  |     |  |  |  |  |  |  |  |  |  |  |  |  |     |  |  |  |  |  |  |  |  |  |  |  |  |     |  |  |  |  |  |  |  |  |  |  |  |  |     |  |  |  |  |  |  |  |  |  |  |  |  |     |  |  |  |  |  |  |  |  |  |  |  |  |     |  |  |  |  |  |  |  |  |  |  |  |  |
| 2-28    | CATCGCCACC | TGGCCAC  | CACCA    | CCGT   | CATCAT    | AACCACACAGAAGGT | CACCAA          |        |                |         |           |             |           |                |           |         |         |       |     |         | 615 |  |  |  |  |  |  |  |  |  |  |     |  |  |  |  |  |  |  |  |  |  |  |  |     |  |  |  |  |  |  |  |  |  |  |  |  |     |  |  |  |  |  |  |  |  |  |  |  |  |     |  |  |  |  |  |  |  |  |  |  |  |  |     |  |  |  |  |  |  |  |  |  |  |  |  |     |  |  |  |  |  |  |  |  |  |  |  |  |     |  |  |  |  |  |  |  |  |  |  |  |  |     |  |  |  |  |  |  |  |  |  |  |  |  |     |  |  |  |  |  |  |  |  |  |  |  |  |
| 2-34    | CACGCCACC  | TGGCCACC | TGGCCACC | GAAACC | CATCATCAA | CATCAT          | AACCACACAGAAGGT | CACCAA | GATCATGACAGACC | GATGTTT | GAGATGAGG | CCCTTCCGGTT | CAACCCCTT | GGGTAGAAAGCCTT | TCGGAGACC | TCCCTTC | GGCAGAC | GCAAT | 825 |         |     |  |  |  |  |  |  |  |  |  |  |     |  |  |  |  |  |  |  |  |  |  |  |  |     |  |  |  |  |  |  |  |  |  |  |  |  |     |  |  |  |  |  |  |  |  |  |  |  |  |     |  |  |  |  |  |  |  |  |  |  |  |  |     |  |  |  |  |  |  |  |  |  |  |  |  |     |  |  |  |  |  |  |  |  |  |  |  |  |     |  |  |  |  |  |  |  |  |  |  |  |  |     |  |  |  |  |  |  |  |  |  |  |  |  |     |  |  |  |  |  |  |  |  |  |  |  |  |
| 2-35    | CATGGC     | CGCCA    | CCACCAG  | CAT    | CATCATCGC | AACCACACAGAAGGT | CACCAA          |        |                |         |           |             |           |                |           |         |         |       |     |         | 537 |  |  |  |  |  |  |  |  |  |  |     |  |  |  |  |  |  |  |  |  |  |  |  |     |  |  |  |  |  |  |  |  |  |  |  |  |     |  |  |  |  |  |  |  |  |  |  |  |  |     |  |  |  |  |  |  |  |  |  |  |  |  |     |  |  |  |  |  |  |  |  |  |  |  |  |     |  |  |  |  |  |  |  |  |  |  |  |  |     |  |  |  |  |  |  |  |  |  |  |  |  |     |  |  |  |  |  |  |  |  |  |  |  |  |     |  |  |  |  |  |  |  |  |  |  |  |  |
| 2-36    | CACGCCACC  | TGGCCACC | TGGCCACC | GAAACC | CATCATCAA | CATCAT          | AACCACACAGAAGGT | CACCAA | GATCATGACAGACC | GATGTTT | GAGATGAGG | CCCTTCCGGTT | CAACCCCTT | GGGTAGAAAGCCTT | TCGGAGACC | TCCCTTC | GGCAGAC | GCAAT | 825 |         |     |  |  |  |  |  |  |  |  |  |  |     |  |  |  |  |  |  |  |  |  |  |  |  |     |  |  |  |  |  |  |  |  |  |  |  |  |     |  |  |  |  |  |  |  |  |  |  |  |  |     |  |  |  |  |  |  |  |  |  |  |  |  |     |  |  |  |  |  |  |  |  |  |  |  |  |     |  |  |  |  |  |  |  |  |  |  |  |  |     |  |  |  |  |  |  |  |  |  |  |  |  |     |  |  |  |  |  |  |  |  |  |  |  |  |     |  |  |  |  |  |  |  |  |  |  |  |  |
| 2-37    | CATGGC     | CGCCA    | CCACCAG  | CAT    | CATCATCGC | AACCACACAGAAGGT | CACCAA          |        |                |         |           |             |           |                |           |         |         |       |     |         | 537 |  |  |  |  |  |  |  |  |  |  |     |  |  |  |  |  |  |  |  |  |  |  |  |     |  |  |  |  |  |  |  |  |  |  |  |  |     |  |  |  |  |  |  |  |  |  |  |  |  |     |  |  |  |  |  |  |  |  |  |  |  |  |     |  |  |  |  |  |  |  |  |  |  |  |  |     |  |  |  |  |  |  |  |  |  |  |  |  |     |  |  |  |  |  |  |  |  |  |  |  |  |     |  |  |  |  |  |  |  |  |  |  |  |  |     |  |  |  |  |  |  |  |  |  |  |  |  |
| 2-38    | CATCGCCACC | TGGCCAC  | CACCA    | CCGT   | CATCAT    | AACCAGACAGAAGGT | CACCAA          |        |                |         |           |             |           |                |           |         |         |       |     |         | 615 |  |  |  |  |  |  |  |  |  |  |     |  |  |  |  |  |  |  |  |  |  |  |  |     |  |  |  |  |  |  |  |  |  |  |  |  |     |  |  |  |  |  |  |  |  |  |  |  |  |     |  |  |  |  |  |  |  |  |  |  |  |  |     |  |  |  |  |  |  |  |  |  |  |  |  |     |  |  |  |  |  |  |  |  |  |  |  |  |     |  |  |  |  |  |  |  |  |  |  |  |  |     |  |  |  |  |  |  |  |  |  |  |  |  |     |  |  |  |  |  |  |  |  |  |  |  |  |
| 2-47    | CATGGC     | CGCCA    | CCACCAG  | CAT    | CATCATCGC | AACCACACAGAAGGT | CACCAA          |        |                |         |           |             |           |                |           |         |         |       |     |         | 537 |  |  |  |  |  |  |  |  |  |  |     |  |  |  |  |  |  |  |  |  |  |  |  |     |  |  |  |  |  |  |  |  |  |  |  |  |     |  |  |  |  |  |  |  |  |  |  |  |  |     |  |  |  |  |  |  |  |  |  |  |  |  |     |  |  |  |  |  |  |  |  |  |  |  |  |     |  |  |  |  |  |  |  |  |  |  |  |  |     |  |  |  |  |  |  |  |  |  |  |  |  |     |  |  |  |  |  |  |  |  |  |  |  |  |     |  |  |  |  |  |  |  |  |  |  |  |  |
| 2-50    |            |          |          |        |           |                 |                 |        |                |         |           |             |           |                |           |         |         |       |     |         | 390 |  |  |  |  |  |  |  |  |  |  |     |  |  |  |  |  |  |  |  |  |  |  |  |     |  |  |  |  |  |  |  |  |  |  |  |  |     |  |  |  |  |  |  |  |  |  |  |  |  |     |  |  |  |  |  |  |  |  |  |  |  |  |     |  |  |  |  |  |  |  |  |  |  |  |  |     |  |  |  |  |  |  |  |  |  |  |  |  |     |  |  |  |  |  |  |  |  |  |  |  |  |     |  |  |  |  |  |  |  |  |  |  |  |  |     |  |  |  |  |  |  |  |  |  |  |  |  |
| 2-52    | CATCGCCACC | TGGCCAC  | CACCA    | CCGT   | CATCAT    | AACCACACAGAAGGT | CACCAA          |        |                |         |           |             |           |                |           |         |         |       |     |         | 615 |  |  |  |  |  |  |  |  |  |  |     |  |  |  |  |  |  |  |  |  |  |  |  |     |  |  |  |  |  |  |  |  |  |  |  |  |     |  |  |  |  |  |  |  |  |  |  |  |  |     |  |  |  |  |  |  |  |  |  |  |  |  |     |  |  |  |  |  |  |  |  |  |  |  |  |     |  |  |  |  |  |  |  |  |  |  |  |  |     |  |  |  |  |  |  |  |  |  |  |  |  |     |  |  |  |  |  |  |  |  |  |  |  |  |     |  |  |  |  |  |  |  |  |  |  |  |  |
| 2-55    | CATGGCCACC | TGGCCA   | CCACCA   | CCGT   | CATCAT    | AACCAGACAGAGGGT | CACCAA          |        |                |         |           |             |           |                |           |         |         |       |     |         | 549 |  |  |  |  |  |  |  |  |  |  |     |  |  |  |  |  |  |  |  |  |  |  |  |     |  |  |  |  |  |  |  |  |  |  |  |  |     |  |  |  |  |  |  |  |  |  |  |  |  |     |  |  |  |  |  |  |  |  |  |  |  |  |     |  |  |  |  |  |  |  |  |  |  |  |  |     |  |  |  |  |  |  |  |  |  |  |  |  |     |  |  |  |  |  |  |  |  |  |  |  |  |     |  |  |  |  |  |  |  |  |  |  |  |  |     |  |  |  |  |  |  |  |  |  |  |  |  |
| 2-56    | CATCGCCACC | TGGCCAC  | CACCA    | CCGT   | CATCAT    | AACCACACAGAAGGT | CACCAA          |        |                |         |           |             |           |                |           |         |         |       |     |         | 615 |  |  |  |  |  |  |  |  |  |  |     |  |  |  |  |  |  |  |  |  |  |  |  |     |  |  |  |  |  |  |  |  |  |  |  |  |     |  |  |  |  |  |  |  |  |  |  |  |  |     |  |  |  |  |  |  |  |  |  |  |  |  |     |  |  |  |  |  |  |  |  |  |  |  |  |     |  |  |  |  |  |  |  |  |  |  |  |  |     |  |  |  |  |  |  |  |  |  |  |  |  |     |  |  |  |  |  |  |  |  |  |  |  |  |     |  |  |  |  |  |  |  |  |  |  |  |  |
| 2-57    | CATCGCCACC | TGGCCAC  | CACCA    | CCGT   | CATCAT    | AACCACACAGAAGGT | CACCAA          |        |                |         |           |             |           |                |           |         |         |       |     |         | 615 |  |  |  |  |  |  |  |  |  |  |     |  |  |  |  |  |  |  |  |  |  |  |  |     |  |  |  |  |  |  |  |  |  |  |  |  |     |  |  |  |  |  |  |  |  |  |  |  |  |     |  |  |  |  |  |  |  |  |  |  |  |  |     |  |  |  |  |  |  |  |  |  |  |  |  |     |  |  |  |  |  |  |  |  |  |  |  |  |     |  |  |  |  |  |  |  |  |  |  |  |  |     |  |  |  |  |  |  |  |  |  |  |  |  |     |  |  |  |  |  |  |  |  |  |  |  |  |
| 2-59    |            |          |          |        |           |                 |                 |        |                |         |           |             |           |                |           |         |         |       |     |         | 390 |  |  |  |  |  |  |  |  |  |  |     |  |  |  |  |  |  |  |  |  |  |  |  |     |  |  |  |  |  |  |  |  |  |  |  |  |     |  |  |  |  |  |  |  |  |  |  |  |  |     |  |  |  |  |  |  |  |  |  |  |  |  |     |  |  |  |  |  |  |  |  |  |  |  |  |     |  |  |  |  |  |  |  |  |  |  |  |  |     |  |  |  |  |  |  |  |  |  |  |  |  |     |  |  |  |  |  |  |  |  |  |  |  |  |     |  |  |  |  |  |  |  |  |  |  |  |  |
| 2-61    | CATGGC     | CGCCA    | CCACCAG  | CAT    | CATCATCGC | AACCACACAGAAGGT | CACCAA          |        |                |         |           |             |           |                |           |         |         |       |     |         | 612 |  |  |  |  |  |  |  |  |  |  |     |  |  |  |  |  |  |  |  |  |  |  |  |     |  |  |  |  |  |  |  |  |  |  |  |  |     |  |  |  |  |  |  |  |  |  |  |  |  |     |  |  |  |  |  |  |  |  |  |  |  |  |     |  |  |  |  |  |  |  |  |  |  |  |  |     |  |  |  |  |  |  |  |  |  |  |  |  |     |  |  |  |  |  |  |  |  |  |  |  |  |     |  |  |  |  |  |  |  |  |  |  |  |  |     |  |  |  |  |  |  |  |  |  |  |  |  |
| 2-63    | CATGGC     | CGCCA    | CCACCAG  | CAC    | CATCATCGT | AACCGCACAGAAGGT | CATCAA          |        |                |         |           |             |           |                |           |         |         |       |     |         | 537 |  |  |  |  |  |  |  |  |  |  |     |  |  |  |  |  |  |  |  |  |  |  |  |     |  |  |  |  |  |  |  |  |  |  |  |  |     |  |  |  |  |  |  |  |  |  |  |  |  |     |  |  |  |  |  |  |  |  |  |  |  |  |     |  |  |  |  |  |  |  |  |  |  |  |  |     |  |  |  |  |  |  |  |  |  |  |  |  |     |  |  |  |  |  |  |  |  |  |  |  |  |     |  |  |  |  |  |  |  |  |  |  |  |  |     |  |  |  |  |  |  |  |  |  |  |  |  |
| 2-64    | CTTCCACC   | TGGCCAC  | CACCA    | CCGT   | CATCAT    | AACCACACAGAAGGT | CACCAA          |        |                |         |           |             |           |                |           |         |         |       |     |         | 615 |  |  |  |  |  |  |  |  |  |  |     |  |  |  |  |  |  |  |  |  |  |  |  |     |  |  |  |  |  |  |  |  |  |  |  |  |     |  |  |  |  |  |  |  |  |  |  |  |  |     |  |  |  |  |  |  |  |  |  |  |  |  |     |  |  |  |  |  |  |  |  |  |  |  |  |     |  |  |  |  |  |  |  |  |  |  |  |  |     |  |  |  |  |  |  |  |  |  |  |  |  |     |  |  |  |  |  |  |  |  |  |  |  |  |     |  |  |  |  |  |  |  |  |  |  |  |  |
| 2-65    |            |          |          |        |           |                 |                 |        |                |         |           |             |           |                |           |         |         |       |     |         | 390 |  |  |  |  |  |  |  |  |  |  |     |  |  |  |  |  |  |  |  |  |  |  |  |     |  |  |  |  |  |  |  |  |  |  |  |  |     |  |  |  |  |  |  |  |  |  |  |  |  |     |  |  |  |  |  |  |  |  |  |  |  |  |     |  |  |  |  |  |  |  |  |  |  |  |  |     |  |  |  |  |  |  |  |  |  |  |  |  |     |  |  |  |  |  |  |  |  |  |  |  |  |     |  |  |  |  |  |  |  |  |  |  |  |  |     |  |  |  |  |  |  |  |  |  |  |  |  |
| 2-66    | CATGG      | CCA      | CCACCA   | CCGT   | CATCAT    | AACCAGACAGAGGGT | CACCAA          |        |                |         |           |             |           |                |           |         |         |       |     |         | 531 |  |  |  |  |  |  |  |  |  |  |     |  |  |  |  |  |  |  |  |  |  |  |  |     |  |  |  |  |  |  |  |  |  |  |  |  |     |  |  |  |  |  |  |  |  |  |  |  |  |     |  |  |  |  |  |  |  |  |  |  |  |  |     |  |  |  |  |  |  |  |  |  |  |  |  |     |  |  |  |  |  |  |  |  |  |  |  |  |     |  |  |  |  |  |  |  |  |  |  |  |  |     |  |  |  |  |  |  |  |  |  |  |  |  |     |  |  |  |  |  |  |  |  |  |  |  |  |
| 2-67    | CATGGC     | CGCCA    | CCACCAG  | CAT    | CATCATCGC | AACCACACAGAAGGT | CACCAA          |        |                |         |           |             |           |                |           |         |         |       |     |         | 537 |  |  |  |  |  |  |  |  |  |  |     |  |  |  |  |  |  |  |  |  |  |  |  |     |  |  |  |  |  |  |  |  |  |  |  |  |     |  |  |  |  |  |  |  |  |  |  |  |  |     |  |  |  |  |  |  |  |  |  |  |  |  |     |  |  |  |  |  |  |  |  |  |  |  |  |     |  |  |  |  |  |  |  |  |  |  |  |  |     |  |  |  |  |  |  |  |  |  |  |  |  |     |  |  |  |  |  |  |  |  |  |  |  |  |     |  |  |  |  |  |  |  |  |  |  |  |  |
| 2-73    | CATGGC     | CGCCA    | CCACCAG  | CAT    | CATCATCGC | AACCACACAGAAGGT | CACCAA          |        |                |         |           |             |           |                |           |         |         |       |     |         | 537 |  |  |  |  |  |  |  |  |  |  |     |  |  |  |  |  |  |  |  |  |  |  |  |     |  |  |  |  |  |  |  |  |  |  |  |  |     |  |  |  |  |  |  |  |  |  |  |  |  |     |  |  |  |  |  |  |  |  |  |  |  |  |     |  |  |  |  |  |  |  |  |  |  |  |  |     |  |  |  |  |  |  |  |  |  |  |  |  |     |  |  |  |  |  |  |  |  |  |  |  |  |     |  |  |  |  |  |  |  |  |  |  |  |  |     |  |  |  |  |  |  |  |  |  |  |  |  |
| 2-76    | CATCGCCACC | TGGCCAC  | CACCA    | CCGT   | CATCAT    | AACCACACAGAAGGT | CACCAA          |        |                |         |           |             |           |                |           |         |         |       |     |         | 615 |  |  |  |  |  |  |  |  |  |  |     |  |  |  |  |  |  |  |  |  |  |  |  |     |  |  |  |  |  |  |  |  |  |  |  |  |     |  |  |  |  |  |  |  |  |  |  |  |  |     |  |  |  |  |  |  |  |  |  |  |  |  |     |  |  |  |  |  |  |  |  |  |  |  |  |     |  |  |  |  |  |  |  |  |  |  |  |  |     |  |  |  |  |  |  |  |  |  |  |  |  |     |  |  |  |  |  |  |  |  |  |  |  |  |     |  |  |  |  |  |  |  |  |  |  |  |  |
| 2-77    | CATCGCCACC | TGGCCAC  | CACCA    | CCGT   | CATCAT    | AACCACACAGAAGGT | CACCAA          |        |                |         |           |             |           |                |           |         |         |       |     |         | 615 |  |  |  |  |  |  |  |  |  |  |     |  |  |  |  |  |  |  |  |  |  |  |  |     |  |  |  |  |  |  |  |  |  |  |  |  |     |  |  |  |  |  |  |  |  |  |  |  |  |     |  |  |  |  |  |  |  |  |  |  |  |  |     |  |  |  |  |  |  |  |  |  |  |  |  |     |  |  |  |  |  |  |  |  |  |  |  |  |     |  |  |  |  |  |  |  |  |  |  |  |  |     |  |  |  |  |  |  |  |  |  |  |  |  |     |  |  |  |  |  |  |  |  |  |  |  |  |
| 2-79    | CATCGCCACC | TGGCCAC  | CACCA    | CCGT   | CATCAT    | AACCAGACAGAAGGT | CACCAA          |        |                |         |           |             |           |                |           |         |         |       |     |         | 615 |  |  |  |  |  |  |  |  |  |  |     |  |  |  |  |  |  |  |  |  |  |  |  |     |  |  |  |  |  |  |  |  |  |  |  |  |     |  |  |  |  |  |  |  |  |  |  |  |  |     |  |  |  |  |  |  |  |  |  |  |  |  |     |  |  |  |  |  |  |  |  |  |  |  |  |     |  |  |  |  |  |  |  |  |  |  |  |  |     |  |  |  |  |  |  |  |  |  |  |  |  |     |  |  |  |  |  |  |  |  |  |  |  |  |     |  |  |  |  |  |  |  |  |  |  |  |  |
| 2-82    | CATCGCCACC | TGGCCAC  | CACCA    | CCGT   | CATCAT    | AACCACACAGAAGGT | CACCAA          |        |                |         |           |             |           |                |           |         |         |       |     |         | 615 |  |  |  |  |  |  |  |  |  |  |     |  |  |  |  |  |  |  |  |  |  |  |  |     |  |  |  |  |  |  |  |  |  |  |  |  |     |  |  |  |  |  |  |  |  |  |  |  |  |     |  |  |  |  |  |  |  |  |  |  |  |  |     |  |  |  |  |  |  |  |  |  |  |  |  |     |  |  |  |  |  |  |  |  |  |  |  |  |     |  |  |  |  |  |  |  |  |  |  |  |  |     |  |  |  |  |  |  |  |  |  |  |  |  |     |  |  |  |  |  |  |  |  |  |  |  |  |
| 2-84    |            |          |          |        |           |                 |                 |        |                |         |           |             |           |                |           |         |         |       |     |         | 390 |  |  |  |  |  |  |  |  |  |  |     |  |  |  |  |  |  |  |  |  |  |  |  |     |  |  |  |  |  |  |  |  |  |  |  |  |     |  |  |  |  |  |  |  |  |  |  |  |  |     |  |  |  |  |  |  |  |  |  |  |  |  |     |  |  |  |  |  |  |  |  |  |  |  |  |     |  |  |  |  |  |  |  |  |  |  |  |  |     |  |  |  |  |  |  |  |  |  |  |  |  |     |  |  |  |  |  |  |  |  |  |  |  |  |     |  |  |  |  |  |  |  |  |  |  |  |  |
| 2-90    | CATGGC     | CGCCA    | CCACCAG  | CAC    | CATCATCGT | AACCGCACAGAAGGT | CATCAA          |        |                |         |           |             |           |                |           |         |         |       |     |         | 537 |  |  |  |  |  |  |  |  |  |  |     |  |  |  |  |  |  |  |  |  |  |  |  |     |  |  |  |  |  |  |  |  |  |  |  |  |     |  |  |  |  |  |  |  |  |  |  |  |  |     |  |  |  |  |  |  |  |  |  |  |  |  |     |  |  |  |  |  |  |  |  |  |  |  |  |     |  |  |  |  |  |  |  |  |  |  |  |  |     |  |  |  |  |  |  |  |  |  |  |  |  |     |  |  |  |  |  |  |  |  |  |  |  |  |     |  |  |  |  |  |  |  |  |  |  |  |  |
| 2-91    | CATGGC     | CGCCA    | CCACCAG  | CAC    | CATCATCGT | AACCGCACAGAAGGT | CATCAA          |        |                |         |           |             |           |                |           |         |         |       |     |         | 537 |  |  |  |  |  |  |  |  |  |  |     |  |  |  |  |  |  |  |  |  |  |  |  |     |  |  |  |  |  |  |  |  |  |  |  |  |     |  |  |  |  |  |  |  |  |  |  |  |  |     |  |  |  |  |  |  |  |  |  |  |  |  |     |  |  |  |  |  |  |  |  |  |  |  |  |     |  |  |  |  |  |  |  |  |  |  |  |  |     |  |  |  |  |  |  |  |  |  |  |  |  |     |  |  |  |  |  |  |  |  |  |  |  |  |     |  |  |  |  |  |  |  |  |  |  |  |  |
| 2-95    | CATGGC     | CGCCA    | CCACCAG  | CAT    | CATCATCGC | AACCACACAGAAGGT | CACCAA          |        |                |         |           |             |           |                |           |         |         |       |     |         | 537 |  |  |  |  |  |  |  |  |  |  |     |  |  |  |  |  |  |  |  |  |  |  |  |     |  |  |  |  |  |  |  |  |  |  |  |  |     |  |  |  |  |  |  |  |  |  |  |  |  |     |  |  |  |  |  |  |  |  |  |  |  |  |     |  |  |  |  |  |  |  |  |  |  |  |  |     |  |  |  |  |  |  |  |  |  |  |  |  |     |  |  |  |  |  |  |  |  |  |  |  |  |     |  |  |  |  |  |  |  |  |  |  |  |  |     |  |  |  |  |  |  |  |  |  |  |  |  |
| 2-102   | CATCGCCACC | TGGCCAC  | CACCA    | CCGT   | CATCAT    | AACCAGACAGAAGGT | CACCAA          |        |                |         |           |             |           |                |           |         |         |       |     |         | 615 |  |  |  |  |  |  |  |  |  |  |     |  |  |  |  |  |  |  |  |  |  |  |  |     |  |  |  |  |  |  |  |  |  |  |  |  |     |  |  |  |  |  |  |  |  |  |  |  |  |     |  |  |  |  |  |  |  |  |  |  |  |  |     |  |  |  |  |  |  |  |  |  |  |  |  |     |  |  |  |  |  |  |  |  |  |  |  |  |     |  |  |  |  |  |  |  |  |  |  |  |  |     |  |  |  |  |  |  |  |  |  |  |  |  |     |  |  |  |  |  |  |  |  |  |  |  |  |
| 2-103   | CATGG      | CCA      | CCACCA   | CCGT   | CATCAT    | AACCAGACAGAGGGT | CACCAA          |        |                |         |           |             |           |                |           |         |         |       |     |         | 531 |  |  |  |  |  |  |  |  |  |  |     |  |  |  |  |  |  |  |  |  |  |  |  |     |  |  |  |  |  |  |  |  |  |  |  |  |     |  |  |  |  |  |  |  |  |  |  |  |  |     |  |  |  |  |  |  |  |  |  |  |  |  |     |  |  |  |  |  |  |  |  |  |  |  |  |     |  |  |  |  |  |  |  |  |  |  |  |  |     |  |  |  |  |  |  |  |  |  |  |  |  |     |  |  |  |  |  |  |  |  |  |  |  |  |     |  |  |  |  |  |  |  |  |  |  |  |  |
| 2-105   | CATGGC     | CGCCA    | CCACCAG  | CAC    | CATCATCGT | AACCGCACAGAAGGT | CATCAA          |        |                |         |           |             |           |                |           |         |         |       |     |         | 537 |  |  |  |  |  |  |  |  |  |  |     |  |  |  |  |  |  |  |  |  |  |  |  |     |  |  |  |  |  |  |  |  |  |  |  |  |     |  |  |  |  |  |  |  |  |  |  |  |  |     |  |  |  |  |  |  |  |  |  |  |  |  |     |  |  |  |  |  |  |  |  |  |  |  |  |     |  |  |  |  |  |  |  |  |  |  |  |  |     |  |  |  |  |  |  |  |  |  |  |  |  |     |  |  |  |  |  |  |  |  |  |  |  |  |     |  |  |  |  |  |  |  |  |  |  |  |  |
| 2-106   | CATCGCCACC | TGGCCAC  | CACCA    | CCGT   | CATCAT    | AACCACACAGAAGGT | CACCAA          |        |                |         |           |             |           |                |           |         |         |       |     |         | 615 |  |  |  |  |  |  |  |  |  |  |     |  |  |  |  |  |  |  |  |  |  |  |  |     |  |  |  |  |  |  |  |  |  |  |  |  |     |  |  |  |  |  |  |  |  |  |  |  |  |     |  |  |  |  |  |  |  |  |  |  |  |  |     |  |  |  |  |  |  |  |  |  |  |  |  |     |  |  |  |  |  |  |  |  |  |  |  |  |     |  |  |  |  |  |  |  |  |  |  |  |  |     |  |  |  |  |  |  |  |  |  |  |  |  |     |  |  |  |  |  |  |  |  |  |  |  |  |
| 2-107   | CATGGC     | CGCCA    | CCACCAG  | CAT    | CATCATCGC | AACCACACAGAAGGT | CACCAA          |        |                |         |           |             |           |                |           |         |         |       |     |         | 537 |  |  |  |  |  |  |  |  |  |  |     |  |  |  |  |  |  |  |  |  |  |  |  |     |  |  |  |  |  |  |  |  |  |  |  |  |     |  |  |  |  |  |  |  |  |  |  |  |  |     |  |  |  |  |  |  |  |  |  |  |  |  |     |  |  |  |  |  |  |  |  |  |  |  |  |     |  |  |  |  |  |  |  |  |  |  |  |  |     |  |  |  |  |  |  |  |  |  |  |  |  |     |  |  |  |  |  |  |  |  |  |  |  |  |     |  |  |  |  |  |  |  |  |  |  |  |  |
| 2-109   | CATCGCCACC | TGGCCAC  | CACCA    | CCGT   | CATCAT    | AACCACACAGAAGGT | CACCAA          |        |                |         |           |             |           |                |           |         |         |       |     |         | 615 |  |  |  |  |  |  |  |  |  |  |     |  |  |  |  |  |  |  |  |  |  |  |  |     |  |  |  |  |  |  |  |  |  |  |  |  |     |  |  |  |  |  |  |  |  |  |  |  |  |     |  |  |  |  |  |  |  |  |  |  |  |  |     |  |  |  |  |  |  |  |  |  |  |  |  |     |  |  |  |  |  |  |  |  |  |  |  |  |     |  |  |  |  |  |  |  |  |  |  |  |  |     |  |  |  |  |  |  |  |  |  |  |  |  |     |  |  |  |  |  |  |  |  |  |  |  |  |
| 2-111   | CATCGCCACC | TGGCCAC  | CACCA    | CCGT   | CATCAT    | AACCAGACAGAAGGT | CACCAA          |        |                |         |           |             |           |                |           |         |         |       |     |         | 615 |  |  |  |  |  |  |  |  |  |  |     |  |  |  |  |  |  |  |  |  |  |  |  |     |  |  |  |  |  |  |  |  |  |  |  |  |     |  |  |  |  |  |  |  |  |  |  |  |  |     |  |  |  |  |  |  |  |  |  |  |  |  |     |  |  |  |  |  |  |  |  |  |  |  |  |     |  |  |  |  |  |  |  |  |  |  |  |  |     |  |  |  |  |  |  |  |  |  |  |  |  |     |  |  |  |  |  |  |  |  |  |  |  |  |     |  |  |  |  |  |  |  |  |  |  |  |  |
| 2-115   | CATCGCCACC | TGGCCAC  | CACCA    | CCGT   | CATCAT    | AACCACACAGAAGGT | CACCAA          |        |                |         |           |             |           |                |           |         |         |       |     |         | 615 |  |  |  |  |  |  |  |  |  |  |     |  |  |  |  |  |  |  |  |  |  |  |  |     |  |  |  |  |  |  |  |  |  |  |  |  |     |  |  |  |  |  |  |  |  |  |  |  |  |     |  |  |  |  |  |  |  |  |  |  |  |  |     |  |  |  |  |  |  |  |  |  |  |  |  |     |  |  |  |  |  |  |  |  |  |  |  |  |     |  |  |  |  |  |  |  |  |  |  |  |  |     |  |  |  |  |  |  |  |  |  |  |  |  |     |  |  |  |  |  |  |  |  |  |  |  |  |
| 2-116   |            |          |          |        |           |                 |                 |        |                |         |           |             |           |                |           |         |         |       |     |         | 390 |  |  |  |  |  |  |  |  |  |  |     |  |  |  |  |  |  |  |  |  |  |  |  |     |  |  |  |  |  |  |  |  |  |  |  |  |     |  |  |  |  |  |  |  |  |  |  |  |  |     |  |  |  |  |  |  |  |  |  |  |  |  |     |  |  |  |  |  |  |  |  |  |  |  |  |     |  |  |  |  |  |  |  |  |  |  |  |  |     |  |  |  |  |  |  |  |  |  |  |  |  |     |  |  |  |  |  |  |  |  |  |  |  |  |     |  |  |  |  |  |  |  |  |  |  |  |  |
| 2-118   | CATGGC     | CGCCA    | CCACCAG  | CAT    | CATCATCGC | AACCACACAGAAGGT | CACCAA          |        |                |         |           |             |           |                |           |         |         |       |     |         | 537 |  |  |  |  |  |  |  |  |  |  |     |  |  |  |  |  |  |  |  |  |  |  |  |     |  |  |  |  |  |  |  |  |  |  |  |  |     |  |  |  |  |  |  |  |  |  |  |  |  |     |  |  |  |  |  |  |  |  |  |  |  |  |     |  |  |  |  |  |  |  |  |  |  |  |  |     |  |  |  |  |  |  |  |  |  |  |  |  |     |  |  |  |  |  |  |  |  |  |  |  |  |     |  |  |  |  |  |  |  |  |  |  |  |  |     |  |  |  |  |  |  |  |  |  |  |  |  |
| 2-119   | CATGGC     | CGCCA    | CCACCAG  | CAT    | CATCATCGC | AACCACACAGAAGGT | CACCAA          |        |                |         |           |             |           |                |           |         |         |       |     |         | 537 |  |  |  |  |  |  |  |  |  |  |     |  |  |  |  |  |  |  |  |  |  |  |  |     |  |  |  |  |  |  |  |  |  |  |  |  |     |  |  |  |  |  |  |  |  |  |  |  |  |     |  |  |  |  |  |  |  |  |  |  |  |  |     |  |  |  |  |  |  |  |  |  |  |  |  |     |  |  |  |  |  |  |  |  |  |  |  |  |     |  |  |  |  |  |  |  |  |  |  |  |  |     |  |  |  |  |  |  |  |  |  |  |  |  |     |  |  |  |  |  |  |  |  |  |  |  |  |
| 4-1501  | CATCGCCACC | TGGCCAC  | CACCA    | CCGT   | CATCAT    | AACCACACAGAAGGT | CACCAA          |        |                |         |           |             |           |                |           |         |         |       |     |         | 615 |  |  |  |  |  |  |  |  |  |  |     |  |  |  |  |  |  |  |  |  |  |  |  |     |  |  |  |  |  |  |  |  |  |  |  |  |     |  |  |  |  |  |  |  |  |  |  |  |  |     |  |  |  |  |  |  |  |  |  |  |  |  |     |  |  |  |  |  |  |  |  |  |  |  |  |     |  |  |  |  |  |  |  |  |  |  |  |  |     |  |  |  |  |  |  |  |  |  |  |  |  |     |  |  |  |  |  |  |  |  |  |  |  |  |     |  |  |  |  |  |  |  |  |  |  |  |  |
| 4-1503  |            |          |          |        |           |                 |                 |        |                |         |           |             |           |                |           |         |         |       |     |         | 390 |  |  |  |  |  |  |  |  |  |  |     |  |  |  |  |  |  |  |  |  |  |  |  |     |  |  |  |  |  |  |  |  |  |  |  |  |     |  |  |  |  |  |  |  |  |  |  |  |  |     |  |  |  |  |  |  |  |  |  |  |  |  |     |  |  |  |  |  |  |  |  |  |  |  |  |     |  |  |  |  |  |  |  |  |  |  |  |  |     |  |  |  |  |  |  |  |  |  |  |  |  |     |  |  |  |  |  |  |  |  |  |  |  |  |     |  |  |  |  |  |  |  |  |  |  |  |  |
| 4-1508  |            |          |          |        |           |                 |                 |        |                |         |           |             |           |                |           |         |         |       |     |         | 390 |  |  |  |  |  |  |  |  |  |  |     |  |  |  |  |  |  |  |  |  |  |  |  |     |  |  |  |  |  |  |  |  |  |  |  |  |     |  |  |  |  |  |  |  |  |  |  |  |  |     |  |  |  |  |  |  |  |  |  |  |  |  |     |  |  |  |  |  |  |  |  |  |  |  |  |     |  |  |  |  |  |  |  |  |  |  |  |  |     |  |  |  |  |  |  |  |  |  |  |  |  |     |  |  |  |  |  |  |  |  |  |  |  |  |     |  |  |  |  |  |  |  |  |  |  |  |  |
| 4-1511  | CATCGCCACC | TGGCCAC  | CACCA    | CCCT   | CATCAT    | AACCACACAGAAGGT | CACCAA          |        |                |         |           |             |           |                |           |         |         |       |     |         | 615 |  |  |  |  |  |  |  |  |  |  |     |  |  |  |  |  |  |  |  |  |  |  |  |     |  |  |  |  |  |  |  |  |  |  |  |  |     |  |  |  |  |  |  |  |  |  |  |  |  |     |  |  |  |  |  |  |  |  |  |  |  |  |     |  |  |  |  |  |  |  |  |  |  |  |  |     |  |  |  |  |  |  |  |  |  |  |  |  |     |  |  |  |  |  |  |  |  |  |  |  |  |     |  |  |  |  |  |  |  |  |  |  |  |  |     |  |  |  |  |  |  |  |  |  |  |  |  |
| 4-1515  | CATCGCCACC | TGGCCAC  | CACCA    | CCGT   | CATCAT    | AACCACACAGAAGGT | CACCAA          |        |                |         |           |             |           |                |           |         |         |       |     |         | 615 |  |  |  |  |  |  |  |  |  |  |     |  |  |  |  |  |  |  |  |  |  |  |  |     |  |  |  |  |  |  |  |  |  |  |  |  |     |  |  |  |  |  |  |  |  |  |  |  |  |     |  |  |  |  |  |  |  |  |  |  |  |  |     |  |  |  |  |  |  |  |  |  |  |  |  |     |  |  |  |  |  |  |  |  |  |  |  |  |     |  |  |  |  |  |  |  |  |  |  |  |  |     |  |  |  |  |  |  |  |  |  |  |  |  |     |  |  |  |  |  |  |  |  |  |  |  |  |
| 4-1516  | CATGGCCACC | TCGCCA   | CCACCA   | T      | CATCAT    | AACCAGACAGAAGGT | CACCAA          |        |                |         |           |             |           |                |           |         |         |       |     |         | 546 |  |  |  |  |  |  |  |  |  |  |     |  |  |  |  |  |  |  |  |  |  |  |  |     |  |  |  |  |  |  |  |  |  |  |  |  |     |  |  |  |  |  |  |  |  |  |  |  |  |     |  |  |  |  |  |  |  |  |  |  |  |  |     |  |  |  |  |  |  |  |  |  |  |  |  |     |  |  |  |  |  |  |  |  |  |  |  |  |     |  |  |  |  |  |  |  |  |  |  |  |  |     |  |  |  |  |  |  |  |  |  |  |  |  |     |  |  |  |  |  |  |  |  |  |  |  |  |
| 4-1517  |            |          |          |        |           |                 |                 |        |                |         |           |             |           |                |           |         |         |       |     |         | 390 |  |  |  |  |  |  |  |  |  |  |     |  |  |  |  |  |  |  |  |  |  |  |  |     |  |  |  |  |  |  |  |  |  |  |  |  |     |  |  |  |  |  |  |  |  |  |  |  |  |     |  |  |  |  |  |  |  |  |  |  |  |  |     |  |  |  |  |  |  |  |  |  |  |  |  |     |  |  |  |  |  |  |  |  |  |  |  |  |     |  |  |  |  |  |  |  |  |  |  |  |  |     |  |  |  |  |  |  |  |  |  |  |  |  |     |  |  |  |  |  |  |  |  |  |  |  |  |
| 4-1520  | CATGGC     | CGCCA    | CCACCAG  | CAT    | CATCATCGC | AACCACACAGAAGGT | CACCAA          |        |                |         |           |             |           |                |           |         |         |       |     |         | 537 |  |  |  |  |  |  |  |  |  |  |     |  |  |  |  |  |  |  |  |  |  |  |  |     |  |  |  |  |  |  |  |  |  |  |  |  |     |  |  |  |  |  |  |  |  |  |  |  |  |     |  |  |  |  |  |  |  |  |  |  |  |  |     |  |  |  |  |  |  |  |  |  |  |  |  |     |  |  |  |  |  |  |  |  |  |  |  |  |     |  |  |  |  |  |  |  |  |  |  |  |  |     |  |  |  |  |  |  |  |  |  |  |  |  |     |  |  |  |  |  |  |  |  |  |  |  |  |
| 4-1521  | CATGGCCACC | TGGCCA   | CCACCA   | CCGT   | CATCAT    | AACCAGACAGAGGGT | CACCAA          |        |                |         |           |             |           |                |           |         |         |       |     |         | 549 |  |  |  |  |  |  |  |  |  |  |     |  |  |  |  |  |  |  |  |  |  |  |  |     |  |  |  |  |  |  |  |  |  |  |  |  |     |  |  |  |  |  |  |  |  |  |  |  |  |     |  |  |  |  |  |  |  |  |  |  |  |  |     |  |  |  |  |  |  |  |  |  |  |  |  |     |  |  |  |  |  |  |  |  |  |  |  |  |     |  |  |  |  |  |  |  |  |  |  |  |  |     |  |  |  |  |  |  |  |  |  |  |  |  |     |  |  |  |  |  |  |  |  |  |  |  |  |
| 4-1523  | CATCGCCACC | TGGCCAC  | CACCA    | CCGT   | CATCAT    | AACCACACAGAAGGT | CACCAA          |        |                |         |           |             |           |                |           |         |         |       |     |         | 615 |  |  |  |  |  |  |  |  |  |  |     |  |  |  |  |  |  |  |  |  |  |  |  |     |  |  |  |  |  |  |  |  |  |  |  |  |     |  |  |  |  |  |  |  |  |  |  |  |  |     |  |  |  |  |  |  |  |  |  |  |  |  |     |  |  |  |  |  |  |  |  |  |  |  |  |     |  |  |  |  |  |  |  |  |  |  |  |  |     |  |  |  |  |  |  |  |  |  |  |  |  |     |  |  |  |  |  |  |  |  |  |  |  |  |     |  |  |  |  |  |  |  |  |  |  |  |  |
| 4-1528  | CATGGC     | CGCCA    | CCACCAG  | CAT    | CATCATCGC | AACCACACAGAAGGT | CACCAA          |        |                |         |           |             |           |                |           |         |         |       |     |         | 612 |  |  |  |  |  |  |  |  |  |  |     |  |  |  |  |  |  |  |  |  |  |  |  |     |  |  |  |  |  |  |  |  |  |  |  |  |     |  |  |  |  |  |  |  |  |  |  |  |  |     |  |  |  |  |  |  |  |  |  |  |  |  |     |  |  |  |  |  |  |  |  |  |  |  |  |     |  |  |  |  |  |  |  |  |  |  |  |  |     |  |  |  |  |  |  |  |  |  |  |  |  |     |  |  |  |  |  |  |  |  |  |  |  |  |     |  |  |  |  |  |  |  |  |  |  |  |  |
| 4-1530  | CATCGCCACC | TGGCCAC  | CACCA    | CCGT   | CATCAT    | AACCACACAGAAGGT | CACCAA          |        |                |         |           |             |           |                |           |         |         |       |     |         | 615 |  |  |  |  |  |  |  |  |  |  |     |  |  |  |  |  |  |  |  |  |  |  |  |     |  |  |  |  |  |  |  |  |  |  |  |  |     |  |  |  |  |  |  |  |  |  |  |  |  |     |  |  |  |  |  |  |  |  |  |  |  |  |     |  |  |  |  |  |  |  |  |  |  |  |  |     |  |  |  |  |  |  |  |  |  |  |  |  |     |  |  |  |  |  |  |  |  |  |  |  |  |     |  |  |  |  |  |  |  |  |  |  |  |  |     |  |  |  |  |  |  |  |  |  |  |  |  |
| 4-1531  | CATGGC     | CGCCA    | CCACCAG  | CAT    | CATCATCGC | AACCACACAGAAGGT | CACCAA          |        |                |         |           |             |           |                |           |         |         |       |     |         | 537 |  |  |  |  |  |  |  |  |  |  |     |  |  |  |  |  |  |  |  |  |  |  |  |     |  |  |  |  |  |  |  |  |  |  |  |  |     |  |  |  |  |  |  |  |  |  |  |  |  |     |  |  |  |  |  |  |  |  |  |  |  |  |     |  |  |  |  |  |  |  |  |  |  |  |  |     |  |  |  |  |  |  |  |  |  |  |  |  |     |  |  |  |  |  |  |  |  |  |  |  |  |     |  |  |  |  |  |  |  |  |  |  |  |  |     |  |  |  |  |  |  |  |  |  |  |  |  |
| 4-1532  | CATGGC     | CGCCA    | CCACCAG  | CAT    | CATCATCGC | AACCACACAGAAGGT | CACCAA          |        |                |         |           |             |           |                |           |         |         |       |     |         | 537 |  |  |  |  |  |  |  |  |  |  |     |  |  |  |  |  |  |  |  |  |  |  |  |     |  |  |  |  |  |  |  |  |  |  |  |  |     |  |  |  |  |  |  |  |  |  |  |  |  |     |  |  |  |  |  |  |  |  |  |  |  |  |     |  |  |  |  |  |  |  |  |  |  |  |  |     |  |  |  |  |  |  |  |  |  |  |  |  |     |  |  |  |  |  |  |  |  |  |  |  |  |     |  |  |  |  |  |  |  |  |  |  |  |  |     |  |  |  |  |  |  |  |  |  |  |  |  |
| 4-1533  | CATGGC     | CGCCA    | CCACCAG  | CAT    | CATCATCGC | AACCACACAGAAGGT | CACCAA          |        |                |         |           |             |           |                |           |         |         |       |     |         | 537 |  |  |  |  |  |  |  |  |  |  |     |  |  |  |  |  |  |  |  |  |  |  |  |     |  |  |  |  |  |  |  |  |  |  |  |  |     |  |  |  |  |  |  |  |  |  |  |  |  |     |  |  |  |  |  |  |  |  |  |  |  |  |     |  |  |  |  |  |  |  |  |  |  |  |  |     |  |  |  |  |  |  |  |  |  |  |  |  |     |  |  |  |  |  |  |  |  |  |  |  |  |     |  |  |  |  |  |  |  |  |  |  |  |  |     |  |  |  |  |  |  |  |  |  |  |  |  |
| 4-1534  | CATGGCCACC | TGGCCA   | CCACCA   | CCGT   | CATCAT    | AACCAGACAGAGGGT | CACCAA          |        |                |         |           |             |           |                |           |         |         |       |     |         | 549 |  |  |  |  |  |  |  |  |  |  |     |  |  |  |  |  |  |  |  |  |  |  |  |     |  |  |  |  |  |  |  |  |  |  |  |  |     |  |  |  |  |  |  |  |  |  |  |  |  |     |  |  |  |  |  |  |  |  |  |  |  |  |     |  |  |  |  |  |  |  |  |  |  |  |  |     |  |  |  |  |  |  |  |  |  |  |  |  |     |  |  |  |  |  |  |  |  |  |  |  |  |     |  |  |  |  |  |  |  |  |  |  |  |  |     |  |  |  |  |  |  |  |  |  |  |  |  |
| 4-1535  |            |          |          |        |           |                 |                 |        |                |         |           |             |           |                |           |         |         |       |     |         | 390 |  |  |  |  |  |  |  |  |  |  |     |  |  |  |  |  |  |  |  |  |  |  |  |     |  |  |  |  |  |  |  |  |  |  |  |  |     |  |  |  |  |  |  |  |  |  |  |  |  |     |  |  |  |  |  |  |  |  |  |  |  |  |     |  |  |  |  |  |  |  |  |  |  |  |  |     |  |  |  |  |  |  |  |  |  |  |  |  |     |  |  |  |  |  |  |  |  |  |  |  |  |     |  |  |  |  |  |  |  |  |  |  |  |  |     |  |  |  |  |  |  |  |  |  |  |  |  |
| 4-1536  | CATGGCCACC | TCGCCA   | CCACCA   | T      | CATCAT    | AACCAGACAGAAGGT | CACCAA          |        |                |         |           |             |           |                |           |         |         |       |     |         | 546 |  |  |  |  |  |  |  |  |  |  |     |  |  |  |  |  |  |  |  |  |  |  |  |     |  |  |  |  |  |  |  |  |  |  |  |  |     |  |  |  |  |  |  |  |  |  |  |  |  |     |  |  |  |  |  |  |  |  |  |  |  |  |     |  |  |  |  |  |  |  |  |  |  |  |  |     |  |  |  |  |  |  |  |  |  |  |  |  |     |  |  |  |  |  |  |  |  |  |  |  |  |     |  |  |  |  |  |  |  |  |  |  |  |  |     |  |  |  |  |  |  |  |  |  |  |  |  |
| 4-1538  | CATCGCCACC | TGGCCAC  | CACCA    | CCCT   | CATCAT    | AACCACACAGAAGGT | CACCAA          |        |                |         |           |             |           |                |           |         |         |       |     |         | 615 |  |  |  |  |  |  |  |  |  |  |     |  |  |  |  |  |  |  |  |  |  |  |  |     |  |  |  |  |  |  |  |  |  |  |  |  |     |  |  |  |  |  |  |  |  |  |  |  |  |     |  |  |  |  |  |  |  |  |  |  |  |  |     |  |  |  |  |  |  |  |  |  |  |  |  |     |  |  |  |  |  |  |  |  |  |  |  |  |     |  |  |  |  |  |  |  |  |  |  |  |  |     |  |  |  |  |  |  |  |  |  |  |  |  |     |  |  |  |  |  |  |  |  |  |  |  |  |
| 4-1542  | CATGGC     | CGCCA    | CCACCAG  | CAT    | CATCATCGC | AACCACACAGAAGGT | CACCAA          |        |                |         |           |             |           |                |           |         |         |       |     |         | 537 |  |  |  |  |  |  |  |  |  |  |     |  |  |  |  |  |  |  |  |  |  |  |  |     |  |  |  |  |  |  |  |  |  |  |  |  |     |  |  |  |  |  |  |  |  |  |  |  |  |     |  |  |  |  |  |  |  |  |  |  |  |  |     |  |  |  |  |  |  |  |  |  |  |  |  |     |  |  |  |  |  |  |  |  |  |  |  |  |     |  |  |  |  |  |  |  |  |  |  |  |  |     |  |  |  |  |  |  |  |  |  |  |  |  |     |  |  |  |  |  |  |  |  |  |  |  |  |
| 4-1543  | CATCGCCACC | TGGCCAC  | CACCA    | CCGT   | CATCAT    | AACCACACAGAAGGT | CACCAA          |        |                |         |           |             |           |                |           |         |         |       |     |         | 615 |  |  |  |  |  |  |  |  |  |  |     |  |  |  |  |  |  |  |  |  |  |  |  |     |  |  |  |  |  |  |  |  |  |  |  |  |     |  |  |  |  |  |  |  |  |  |  |  |  |     |  |  |  |  |  |  |  |  |  |  |  |  |     |  |  |  |  |  |  |  |  |  |  |  |  |     |  |  |  |  |  |  |  |  |  |  |  |  |     |  |  |  |  |  |  |  |  |  |  |  |  |     |  |  |  |  |  |  |  |  |  |  |  |  |     |  |  |  |  |  |  |  |  |  |  |  |  |
| 4-1544  | CATGGCCACC | TCGCCA   | CCACCA   | T      | CATCAT    | AACCAGACAGAAGGT | CACCAA          |        |                |         |           |             |           |                |           |         |         |       |     |         | 546 |  |  |  |  |  |  |  |  |  |  |     |  |  |  |  |  |  |  |  |  |  |  |  |     |  |  |  |  |  |  |  |  |  |  |  |  |     |  |  |  |  |  |  |  |  |  |  |  |  |     |  |  |  |  |  |  |  |  |  |  |  |  |     |  |  |  |  |  |  |  |  |  |  |  |  |     |  |  |  |  |  |  |  |  |  |  |  |  |     |  |  |  |  |  |  |  |  |  |  |  |  |     |  |  |  |  |  |  |  |  |  |  |  |  |     |  |  |  |  |  |  |  |  |  |  |  |  |

Repeat 2.1

Repeat 4.1

Repeat 2.2...

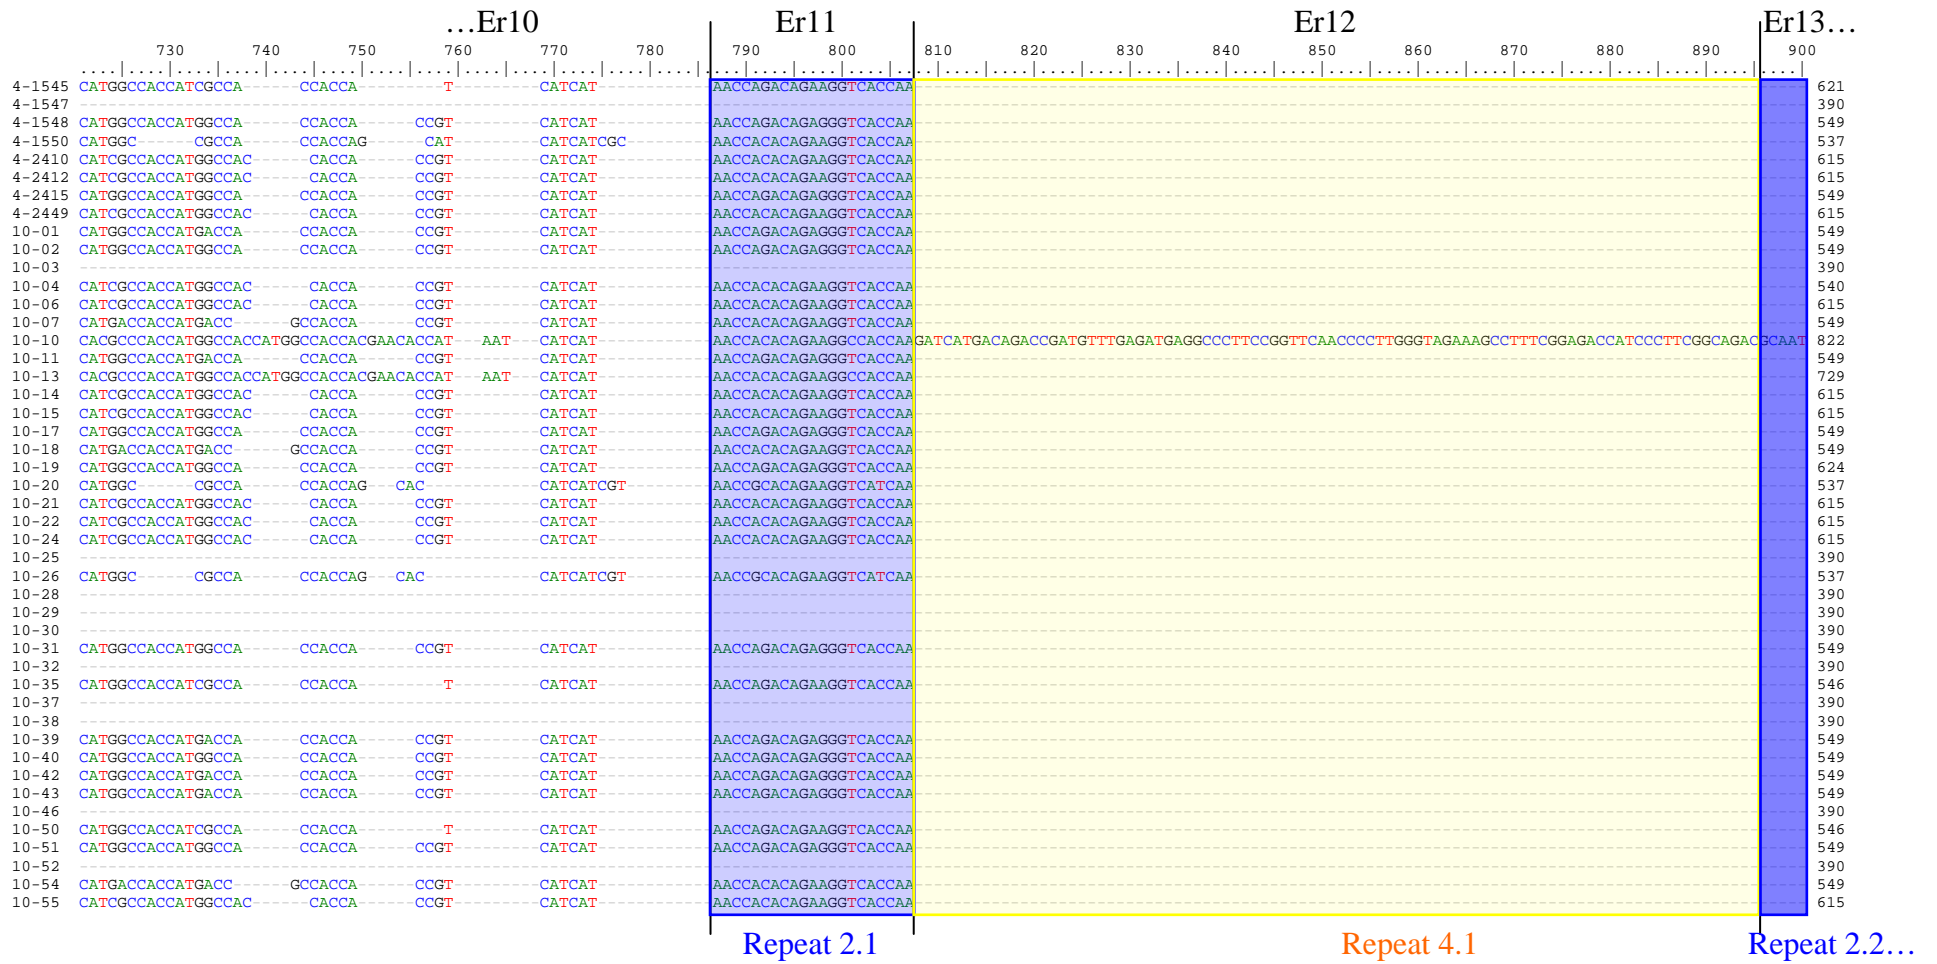

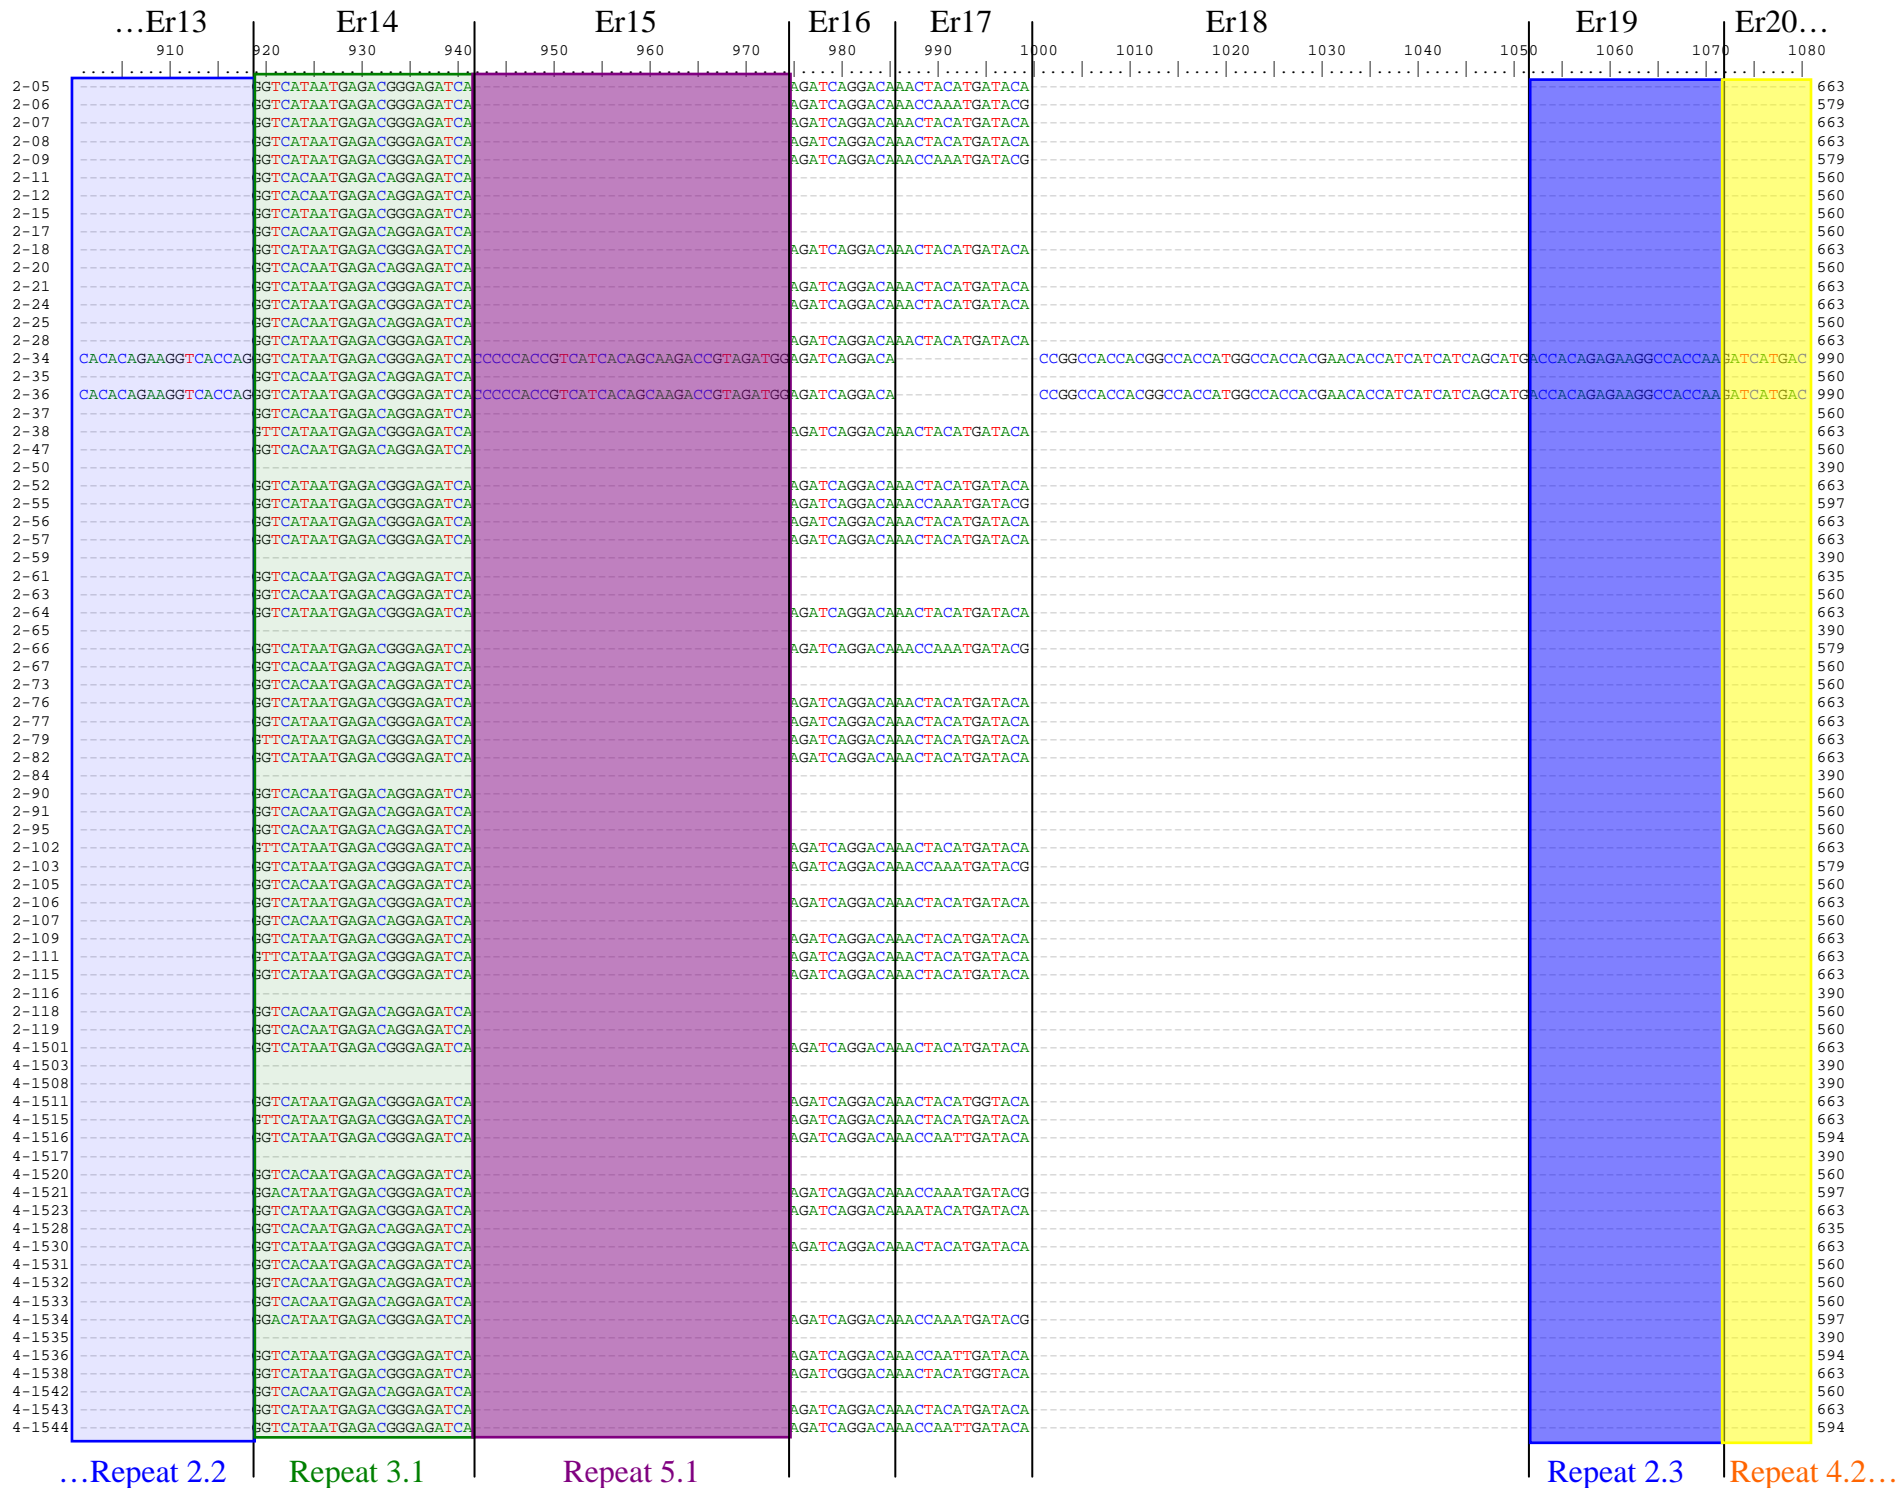

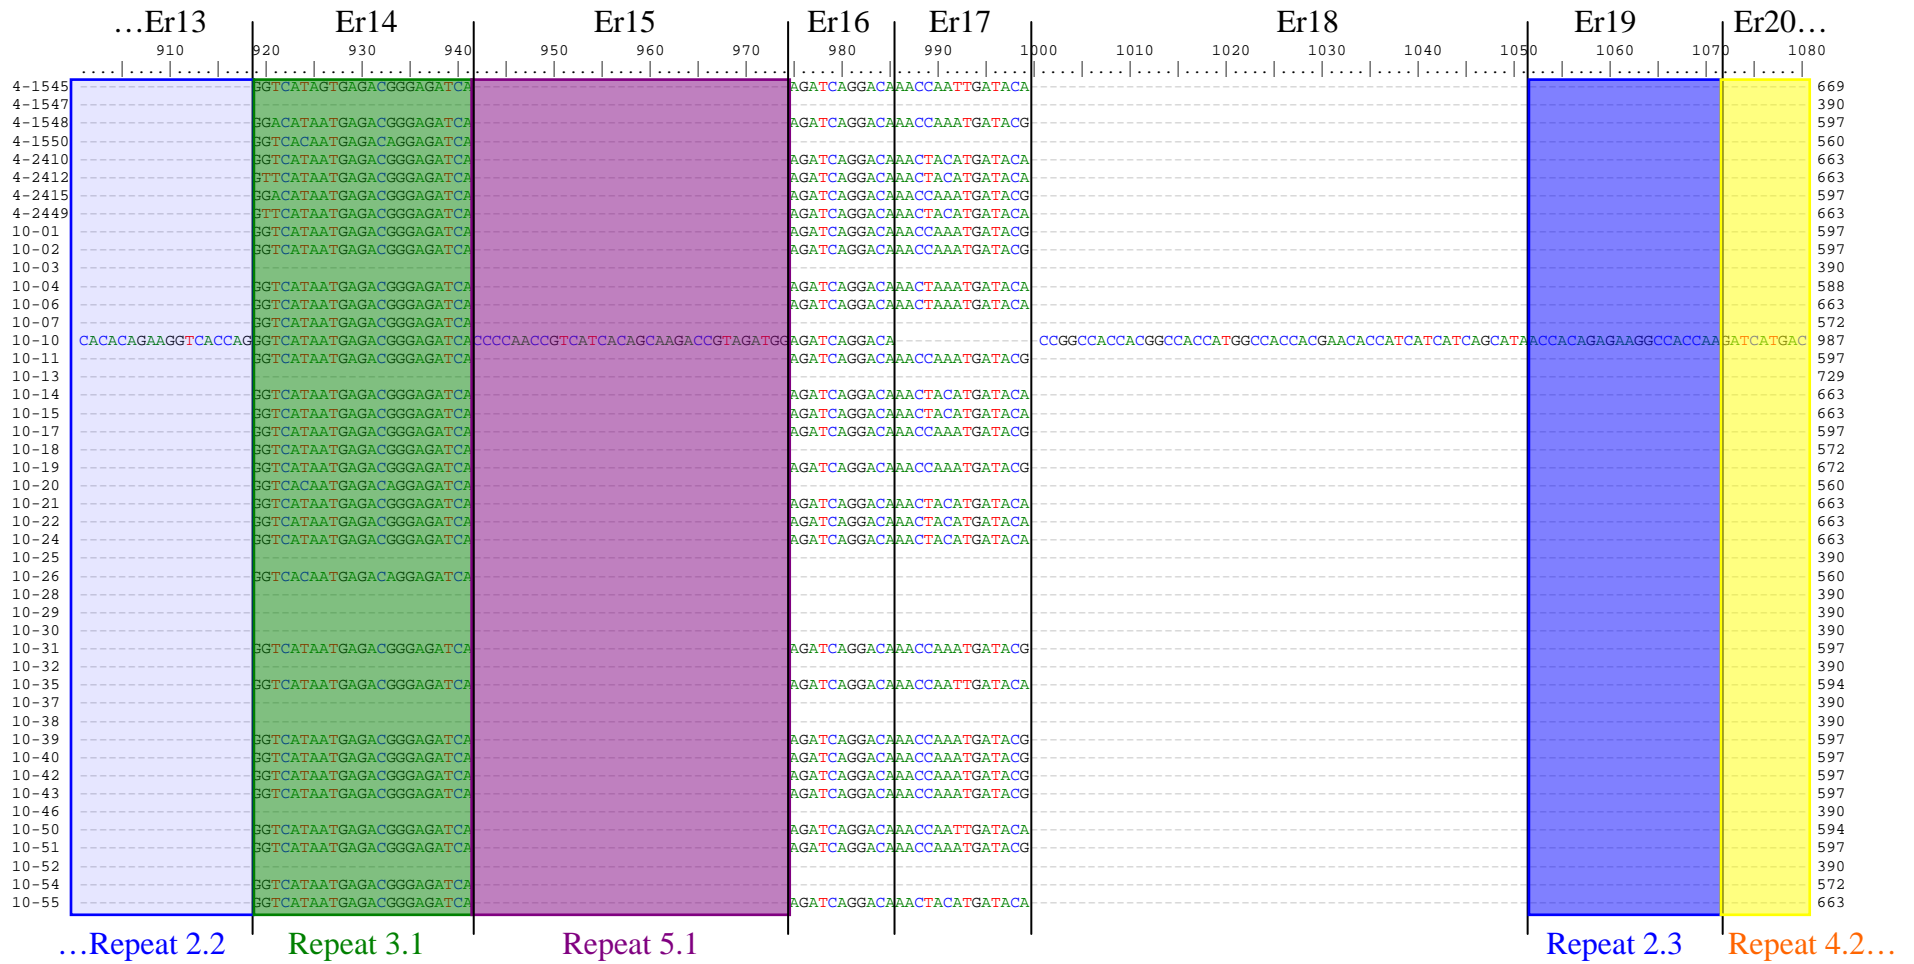













...Er27a

Er27b

1450 1460 1470 1480 1490 1500 1510 1520

4-1545 GAAAGCGTAAACGACATCTTCCACCCTGAAATGGTTGAGATCGCAGTCAATGAAGAAGACGTC AATGTGGTCGCCGAGGTGTAG 1092

4-1547 GAAAGCGTAAACGACATCTTCCACCCTGAAATGGTCGAGATCGCGATCAATGA ----- TGTCCGCCGAGGTGTAG 771

4-1548 GAAAGCGTAAACGACATCTTCCACCCTGAAATGGTTGAGATCGCAGTCAATGAAGAAGACGTC AATGTGGTCGCCGAGGTGTAG 990

4-1550 GAAAGCGTAAACGACATCTTCCACCCTTAAATGGTCGAGATCGCAGTCAATGAAGAAGACATCA AATGTGGTCGCCGAGGTGTAG 876

4-2410 GAAAGCGTAAACGACATCTTCCACCCTGAAATGGTTC ----- GCAATCAATGAAGAAGACATCA AATGTGGTCGCCGAGGTGTAG 1080

4-2412 GAAAGCGTAAACGACATCTTCCACCCTGAAATGGTTC ----- GCAATCAATGAAGAAGACATCA AATGTGGTCGCCGAGGTGTAG 1080

4-2415 GAAAGCGTAAACGACATCTTCCACCCTGAAATGGTTGAGATCGCAGTCAATGAAGAAGACGTC AATGTGGTCGCCGAGGTGTAA 990

4-2449 GAAAGCGTAAACGACATCTTCCACCCTGAAATGGTTC ----- GCAATCAATGAAGAAGACATCA AATGTGGTCGCCGAGGTGTAG 1080

10-01 GAAAGCGTAAACGACATCTTCCACCCTGAAATGGTTGAGATCGCAGTCAATGAAGAAGACGTC AATGTGGTCGCCGAGGTGTAG 990

10-02 GAAAGCGTAAACGACATCTTCCACCCTGAAATGGTTGAGATCGCAGTCAATGAAGAAGACGTC AATGTGGTCGCCGAGGTGTAG 990

10-03 GAAAGCGTAAACGACATCTTCCACCCTGAAATGGTCGAGATCGCGATCAATGA ----- TGTCCGCCGAGGTGTAG 771

10-04 GAAAGCGTAAACGACATCTTCCACCCTGAAATGGTTC ----- GCAATCAATGAAGAAGACATCA AATGTGGTCGCCGAGGTGTAG 1005

10-06 GAAAGCGTAAACGACATCTTCCACCCTGAAATGGTTC ----- GCAATCAATGAAGAAGACATCA AATGTGGTCGCCGAGGTGTAG 1080

10-07 GAAAGCGTAAACGACATCTTCCACCCTGAAATGGTTGAGATCGCATTC AATGAAGAAGACGTC AATGTGGTCGCCGAGGTGTAG 888

10-10 GAAAGCGTAAACGACATCTTCCACCCTTAAATGTATCGAGATCGCAATCAATGAAGTAGACACCAATGTGGTCGCCGAGGTGTAG 1428

10-11 GAAAGCGTAAACGACATCTTCCACCCTGAAATGGTTC ----- GCAATCAATGAAGAAGACATCA AATGTGGTCGCCGAGGTGTAG 984

10-13 GAAAGCGTAAACGACATCTTCCACCCTGAAATGGTTGAGATCGCAGTCAATGAAGAAGACGTC AATGTGGTCGCCGAGGTGTAG 1011

10-14 GAAAGCGTAAACGACATCTTCCACCCTGAAATGGTTC ----- GCAATCAATGAAGAAGACATCA AATGTGGTCGCCGAGGTGTAG 1080

10-15 GAAAGCGTAAACGACATCTTCCACCCTGAAATGGTTC ----- GCAATCAATGAAGAAGACATCA AATGTGGTCGCCGAGGTGTAG 1080

10-17 GAAAGCGTAAACGACATCTTCCACCCTGAAATGGTTGAGATCGCAGTCAATGAAGAAGACGTC AATGTGGTCGCCGAGGTGTAG 990

10-18 GAAAGCGTAAACGACATCTTCCACCCTGAAATGGTTGAGATCGCATTC AATGAAGAAGACGTC AATGTGGTCGCCGAGGTGTAG 888

10-19 GAAAGCGTAAACGACATCTTCCACCCTGAAATGGTTC ----- GCAATCAATGAAGAAGACATCA AATGTGGTCGCCGAGGTGTAG 1059

10-20 GAAAGCGTAAACGACATCTTCCACCCTTAAATGGTCGAGATCGCAGTCAATGAAGAAGACATCA AATGGGTCGCCGAGGTGTAG 876

10-21 GAAAGCGTAAACGACATCTTCCACCCTGAAATGGTTC ----- GCAATCAATGAAGAAGACATCA AATGTGGTCGCCGAGGTGTAG 1080

10-22 GAAAGCGTAAACGACATCTTCCACCCTGAAATGGTTC ----- GCAATCAATGAAGAAGACATCA AATGTGGTCGCCGAGGTGTAG 1080

10-24 GAAAGCGTAAACGACATCTTCCACCCTGAAATGGTTGAGATCGCAGTCAATGAAGAAGACGTC AATGTGGTCGCCGAGGTGTAG 1086

10-25 GAAAGCGTAAACGACATCTTCCACCCTGAAATGGTCGAGATCGCGATCAATGA ----- TGTCCGCCGAGGTGTAG 771

10-26 GAAAGCGTAAACGACATCTTCCACCCTTAAATGGTCGAGATCGCAGTCAATGAAGAAGACATCA AATGGGTCGCCGAGGTGTAG 876

10-28 GAAAGCGTAAACGACATCTTCCACCCTGAAATGGTCGAGATCGCGATCAATGA ----- TGTCCGCCGAGGTGTAG 771

10-29 GAAAGCGTAAACGACATCTTCCACCCTGAAATGGTCGAGATCGCGATCAATGA ----- TGTCCGCCGAGGTGTAG 771

10-30 GAAAGCGTAAACGACATCTTCCACCCTGAAATGGTCGAGATCGCGATCAATGA ----- TGTCCGCCGAGGTGTAG 771

10-31 GAAAGCGTAAACGACATCTTCCACCCTGAAATGGTTGAGATCGCAGTCAATGAAGAAGACGTC AATGTGGTCGCCGAGGTGTAG 990

10-32 GAAAGCGTAAACGACATCTTCCACCCTGAAATGGTCGAGATCGCGATCAATGA ----- TGTCCGCCGAGGTGTAG 771

10-35 GAAAGCGTAAACGACATCTCCACCAGTGAATGGTTGAGATCGCATTC AATGAAGAAGACGTC AATGTGGTCGCCGAGGTGTAG 1017

10-37 GAAAGCGTAAACGACATCTTCCACCCTGAAATGGTCGAGATCGCGATCAATGA ----- TGTCCGCCGAGGTGTAG 771

10-38 GAAAGCGTAAACGACATCTTCCACCCTGAAATGGTCGAGATCGCGATCAATGA ----- TGTCCGCCGAGGTGTAG 771

10-39 GAAAGCGTAAACGACATCTTCCACCCTGAAATGGTTGAGATCGCAGTCAATGAAGAAGACGTC AATGTGGTCGCCGAGGTGTAG 990

10-40 GAAAGCGTAAACGACATCTTCCACCCTGAAATGGTCGAGATCGCGATCAATGA ----- TGTCCGCCGAGGTGTAG 975

10-42 GAAAGCGTAAACGACATCTTCCACCCTGAAATGGTTGAGATCGCAGTCAATGAAGAAGACGTC AATGTGGTCGCCGAGGTGTTA 990

10-43 GAAAGCGTAAACGACATCTTCCACCCTGAAATGGTTGAGATCGCAGTCAATGAAGAAGACGTC AATGTGGTCGCCGAGGTGTTA 990

10-46 GAAAGCGTAAACGACATCTTCCACCCTGAAATGGTCGAGATCGCGATCAATGA ----- TGTGGCCGAGGTGTAG 771

10-50 GAAAGCGTAAACGACATCTTCCACCCTGAAATGGTTGAGATCGCATTC AATGAAGAAGACGTC AATGTGGTCGCCGAGGTGTAG 1017

10-51 GAAAGCGTAAACGACATCTCCACCCTGAAATGGTCGAGATCGCAGTCAATGAAGAAGACGTC AATGTGGTCGCCGAGGTGTAG 990

10-52 GAAAGCGTAAACGACATCTTCCACCCTGAAATGGTCGAGATCGCGATCAATGA ----- TGTCCGCCGAGGTGTAG 771

10-54 GAAAGCGTAAACGACATCTTCCACCCTGAAATGGTTGAGATCGCATTC AATGAAGAAGACGTC AATGTGGTCGCCGAGGTGTAG 888

10-55 GAAAGCGTAAACGACATCTTCCACCCTGAAATGGTTGAGATCGCAGTCAATGAAGAAGACGTC AATGTGGTCGCCGAGGTGTAG 1086
