# Supplementary material for: Extraordinary diversity among members of the large gene family, 185/333, from the purple sea urchin, Strongylocentrotus purpuratus
Source: PubMed Central journal article supplement (PMC1988830; doi:10.1186/1471-2199-8-68), 2007-08-15

**Additional File 7: Repeat-based alignment of the encoded amino acid sequences.** Only the second exon alignment is shown; the leader alignment is identical to that shown in Additional File 3. Element borders are indicated by vertical black lines, and are labeled above the sequence. Repeats are indicated by shaded boxes, which each different color (red = type 1; blue = type 2; green = type 3; yellow = type 4; and purple = type 5).







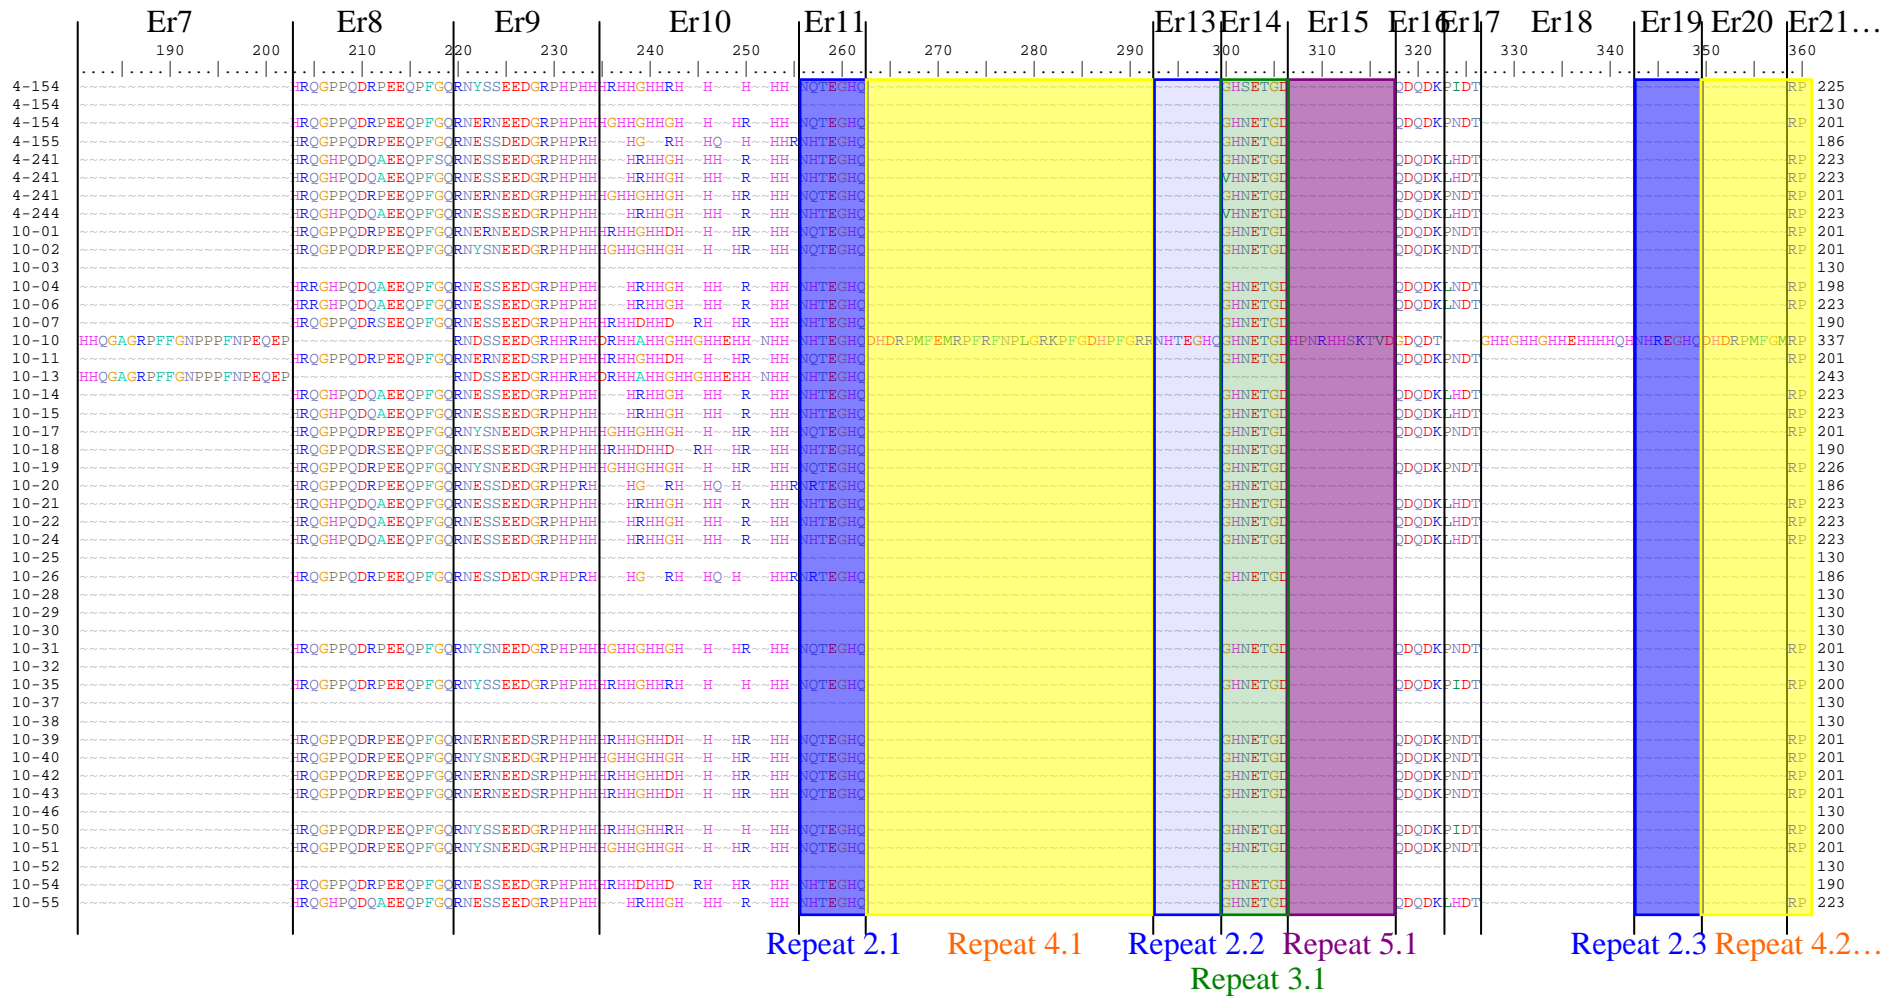

Supplement: 1471-2199-8-68-S7.pdf [file 1471-2199-8-68-S7.pdf]
